# Supplementary material for: Synthesis of 1,4-diketones via palladium/photo-cocatalyzed dehydrogenative cross-coupling
Source: Royal Society of Chemistry journal article supplement (doi:10.1039/d2qo00935h), 2022-01-01

## Supporting Information

### **Synthesis of 1,4-Diketones via Palladium/Photo-Cocatalyzed Dehydrogenative Cross-Coupling**

Pei Fan,<sup>[a, b]</sup> Yujia Mao,<sup>[b]</sup> and Chuan Wang\*,<sup>[b]</sup>

<sup>[a]</sup> School of Chemistry and Materials Engineering, Anhui Province Key Laboratory of Low Temperature Co-Fired Materials, Huainan Normal University, Huainan, Anhui, 232038 (P. R. China).

<sup>[b]</sup> Department of Chemistry, Center for Excellence in Molecular Synthesis, University of Science and Technology of China, Hefei, Anhui, 230026 (P. R. China).

E-mail: [chuanw@ustc.edu.cn](mailto:chuanw@ustc.edu.cn)

### **Table of Contents**

|                                                                                        |    |
|----------------------------------------------------------------------------------------|----|
| General Information.....                                                               | 2  |
| Procedures for Synthesis of Starting Materials.....                                    | 3  |
| General Procedure for Palladium/TBADT-Cocatalyzed Dehydrogenative Cross-Coupling ..... | 5  |
| Characterization Data of 1, 4-Diketones.....                                           | 6  |
| Procedures for 1 mmol Scale Synthesis of 3a.....                                       | 21 |
| Procedures for Derivatizations of the Cross-Coupling Product.....                      | 22 |
| Control Experiments.....                                                               | 24 |
| References.....                                                                        | 26 |
| <sup>1</sup> H, <sup>13</sup> C and <sup>19</sup> F-Spectra.....                       | 27 |

## General Information

Unless otherwise noted, all reagents were purchased from commercial suppliers and used without further purification.  $^1\text{H}$  NMR and  $^{13}\text{C}$  NMR spectra were recorded on a Bruker Advance 400M NMR spectrometers at ambient temperature in  $\text{CDCl}_3$  at 400 and 101 MHz.  $^{19}\text{F}$  NMR were reported as  $^{19}\text{F}$  exp. comp. pulse decoupling ( $\text{F}^{19}\text{CPD}$ ) unless otherwise noted. The chemical shifts are given in ppm relative to tetramethylsilane [ $^1\text{H}$ :  $\delta$  ( $\text{SiMe}_4$ ) = 0.00 ppm] as an internal standard or relative to the resonance of the solvent [ $^1\text{H}$ :  $\delta$  ( $\text{CDCl}_3$ ) = 7.26,  $^{13}\text{C}$ :  $\delta$  ( $\text{CDCl}_3$ ) = 77.16 ppm]. Multiplicities were given as: s (singlet); d (doublet); t (triplet); q (quartet); dd (doublet of doublets); dt (doublet of triplets); m (multiplets), etc. Coupling constants are reported as  $J$  values in Hz. High resolution mass spectral analysis (HRMS) was performed on Waters XEVO G2 Q-TOF. HPLC was performed on Thermo UltiMate 3000. Flash chromatography was performed using 200-300 mesh silica gel with the indicated solvent system.

Unless otherwise noted, all reagents and starting materials were purchased from Aldrich, Strem, Alfa Aesar Energy-chemical, or Adamas-beta used without further purification. TBADT (tetrabutyl ammonium decatungstate) were synthesized according to the reported method<sup>1</sup>.

## Procedures for Synthesis of Starting Materials

Starting aldehydes were purchased from Aldrich, Energy, Alfa Aesar or Adamas-beta.

Allylic alcohols **1a-f** and **1h-t** were synthesized according to the reported methods<sup>2</sup>.

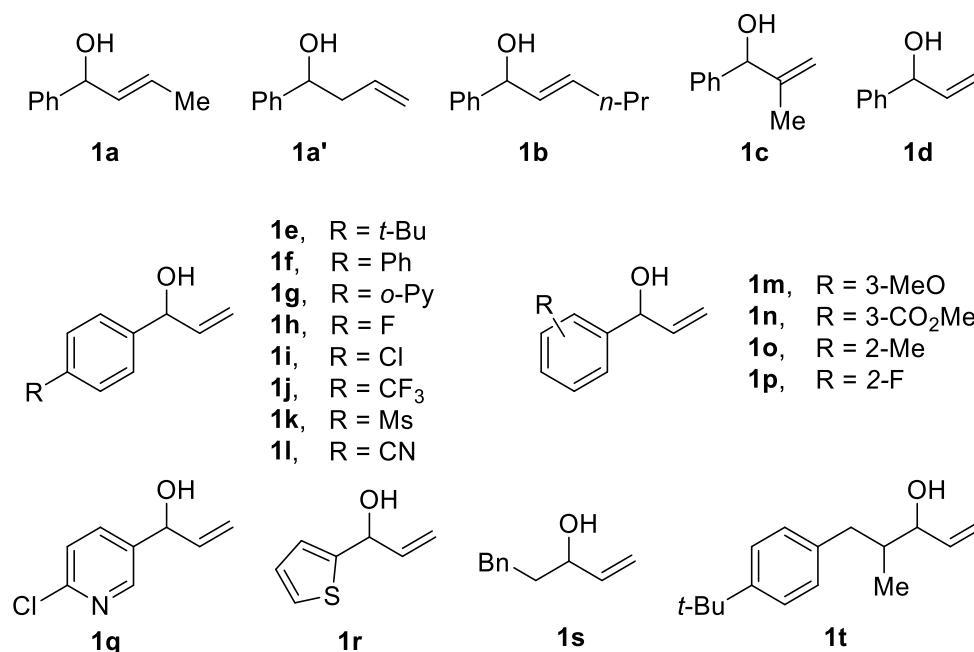

### Procedure for the preparation of 1-(4-(Pyridin-2-yl)phenyl)prop-2-en-1-ol (**1g**)

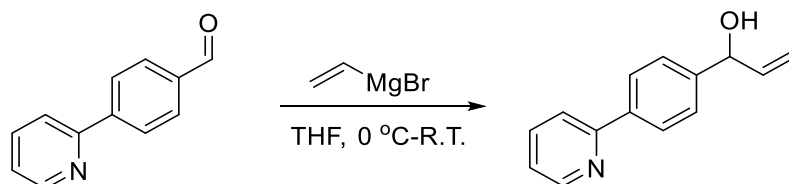

A round bottomed flask was charged with 4-(pyridin-2-yl)benzaldehyde (3.66g, 20 mmol, 1 equiv) in THF (40 mL), flushed with nitrogen, and cooled to 0 °C. Vinylmagnesium bromide (24 mL, 24 mmol, 1.2 equiv, 1 M in THF) was added slowly to the solution. The reaction was warmed to room temperature within 1 hour, before it was quenched with water. The aqueous layer was extracted three times with EtOAc. The combined organic layers were washed with brine, dried over Na<sub>2</sub>SO<sub>4</sub>, filtered, and concentrated under reduced pressure. The residue was purified through column chromatography (silica gel, petroleum ether/ethyl acetate 2:1) to afford the 1-(4-(pyridin-2-yl)phenyl)prop-2-en-1-ol (**1g**) in 82% yield (3.46 g) as a white solid. mp 61-

63 °C **<sup>1</sup>H NMR** (400 MHz, Chloroform-*d*)  $\delta$  = 8.67 (d,  $J$  = 4.8, 1H), 7.95 (d,  $J$  = 8.3 Hz, 2H), 7.77 – 7.67 (m, 2H), 7.45 (d,  $J$  = 8.3 Hz, 2H), 7.24 – 7.20 (m, 1H), 6.07 (ddd,  $J$  = 17.0, 10.3, 6.0 Hz, 1H), 5.36 (d,  $J$  = 17.1 Hz, 1H), 5.25 (d,  $J$  = 6.0 Hz, 1H), 5.20 (d,  $J$  = 10.4, 1H), 2.74 – 2.49 (br s, 1H) ppm. **<sup>13</sup>C NMR** (101 MHz, Chloroform-*d*)  $\delta$  = 157.3, 149.8, 143.6, 140.3, 138.8, 136.9, 127.2 (2C), 126.8 (2C), 122.3, 120.7, 115.4, 75.1 ppm. **HRMS** (ESI)  $m/z$  calculated for C<sub>14</sub>H<sub>14</sub>NO [M+H]<sup>+</sup>: 212.1070, found: 212.1073.

## General Procedure for Palladium/TBADT-Cocatalyzed Dehydrogenative Cross-Coupling

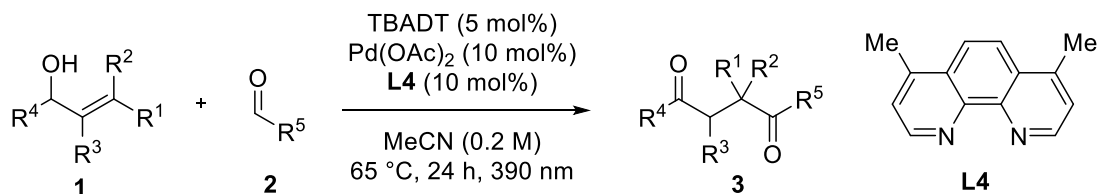

TBADT (tetrabutylammonium decatungstate) (33.2 mg, 0.01 mmol, 5 mol%), Pd(OAc)<sub>2</sub> (4.5 mg, 0.02 mmol, 10 mol%), Ligand **L4** (4.2 mg, 0.02 mmol, 10 mol%), aldehydes **2** (if solid, 0.6 mmol, 3.0 equiv), allylic alcohols **1** (if solid, 0.2 mmol, 1.0 equiv) were placed in a tube equipped with a stir bar. The tube was evacuated and filled with argon (three cycles). To these solids, dry MeCN (1 mL, 0.2 M) was added under argon atmosphere. Next, aldehydes (if liquid, 0.6 mmol, 3.0 equiv) and allylic alcohols (if liquid, 0.2 mmol, 1.0 equiv) were added, sequentially. Subsequently, the reaction mixture was stirred and irradiated using two 34 W 390 nm LED lamps (Kessil PR160-390, 5 cm away to keep the reaction maintain 65 °C) for 24h. After exposing to air for 15 minutes, the reaction mixture was filtered through a pad of silica gel and concentrated under reduced pressure. The residue was purified through column chromatography (silica gel, petroleum ether/ethyl acetate) to afford the desired products **3**.

## Characterization Data of 1, 4-Diketones

### 3-Methyl-1-phenylheptane-1,4-dione (3aa)

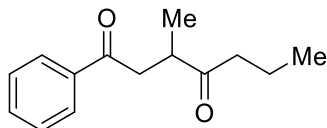

The title compound **3aa** was isolated through column chromatography (silica gel, petroleum ether/ethyl acetate 4:1) as a pale yellow oil. Yield: 75% (32.7 mg), starting from (*E*)-1-phenylbut-2-en-1-ol (**1a**); yield: 52% (22.7 mg), starting from (*Z*)-1-phenylbut-2-en-1-ol (*cis*-**1a**); yield: 34% (14.9 mg), starting from 1-phenylbut-3-en-1-ol (**1a'**).

**<sup>1</sup>H NMR** (400 MHz, Chloroform-*d*)  $\delta$  = 7.95 (d,  $J$  = 7.1 Hz, 2H), 7.54 (t,  $J$  = 7.4 Hz, 1H), 7.44 (t,  $J$  = 7.7 Hz, 2H), 3.54 (dd,  $J$  = 17.9, 8.9 Hz, 1H), 3.27 – 3.16 (m, 1H), 2.91 (dd,  $J$  = 17.9, 4.4 Hz, 1H), 2.69 – 2.52 (m, 2H), 1.70 – 1.58 (m, 2H), 1.17 (d,  $J$  = 7.2 Hz, 3H), 0.93 (t,  $J$  = 7.4 Hz, 3H) ppm.

**<sup>13</sup>C NMR** (101 MHz, Chloroform-*d*)  $\delta$  = 213.8, 198.8, 136.8, 133.3, 128.7 (2C), 128.2 (2C), 43.5, 42.0, 41.2, 17.2, 17.1, 13.9 ppm.

**HRMS** (ESI)  $m/z$  calculated for C<sub>14</sub>H<sub>19</sub>O<sub>2</sub> [M+H]<sup>+</sup>: 219.1380, found: 219.1382.

### 1-Phenyl-3-propylheptane-1,4-dione (3ba)

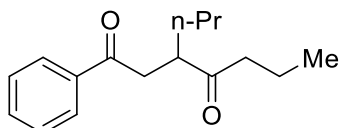

The title compound **3ba** was isolated through column chromatography (silica gel, petroleum ether/ethyl acetate 4:1) as a pale yellow oil (25.6 mg, 52%).

**<sup>1</sup>H NMR** (400 MHz, Chloroform-*d*)  $\delta$  = 7.94 (d,  $J$  = 7.1 Hz, 2H), 7.55 (t,  $J$  = 7.4 Hz, 1H), 7.44 (t,  $J$  = 7.6 Hz, 2H), 3.52 (dd,  $J$  = 17.9, 9.8 Hz, 1H), 3.24 – 3.15 (m, 1H), 2.97 (dd,  $J$  = 17.9, 3.7 Hz, 1H), 2.76 – 2.66 (m, 1H), 2.60 – 2.50 (m, 1H), 1.73 – 1.53 (m, 4H), 1.44 – 1.32 (m, 2H), 0.98 – 0.89 (m, 6H) ppm.

**<sup>13</sup>C NMR** (101 MHz, Chloroform-*d*)  $\delta$  = 213.8, 199.1, 136.8, 133.3, 128.7 (2C), 128.2 (2C), 46.3, 44.7, 40.3, 34.0, 20.6, 17.0, 14.3, 13.9 ppm.

**HRMS** (ESI)  $m/z$  calculated for C<sub>16</sub>H<sub>22</sub>O<sub>2</sub>Na [M+Na]<sup>+</sup>: 269.1512, found: 269.1512.

### 2-Methyl-1-phenylheptane-1,4-dione (3ca)

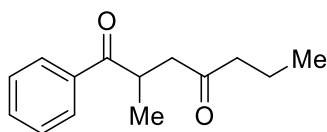

The title compound **3ca** was isolated through column chromatography (silica gel, petroleum ether/ethyl acetate 4:1) as a pale yellow oil (32.7 mg, 75%).

$^1\text{H NMR}$  (400 MHz, Chloroform-*d*)  $\delta$  = 7.98 (d,  $J$  = 7.2 Hz, 2H), 7.55 (t,  $J$  = 7.4 Hz, 1H), 7.46 (t,  $J$  = 7.6 Hz, 2H), 4.03 – 3.94 (m, 1H), 3.13 (dd,  $J$  = 17.9, 8.6 Hz, 1H), 2.52 (dd,  $J$  = 17.9, 5.0 Hz, 1H), 2.46 – 2.36 (m, 2H), 1.63 – 1.55 (m, 2H), 1.17 (d,  $J$  = 7.2 Hz, 3H), 0.90 (t,  $J$  = 7.4 Hz, 3H) ppm.

$^{13}\text{C NMR}$  (101 MHz, Chloroform-*d*)  $\delta$  = 209.7, 203.6, 136.1, 133.1, 128.7 (2C), 128.6 (2C), 46.2, 45.0, 36.2, 17.9, 17.3, 13.8 ppm.

HRMS (ESI)  $m/z$  calculated for  $\text{C}_{14}\text{H}_{19}\text{O}_2$   $[\text{M}+\text{H}]^+$ : 219.1380, found: 219.1385.

### 1-Phenylheptane-1,4-dione (3da)

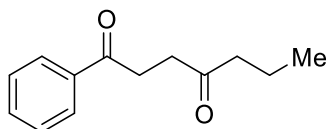

The title compound **3da** was isolated through column chromatography (silica gel, petroleum ether/ethyl acetate 4:1) as a pale yellow oil (29.0 mg, 71%).

$^1\text{H NMR}$  (400 MHz, Chloroform-*d*)  $\delta$  = 7.98 (d,  $J$  = 7.4 Hz, 2H), 7.55 (t,  $J$  = 7.4 Hz, 1H), 7.45 (t,  $J$  = 7.6 Hz, 2H), 3.28 (t,  $J$  = 6.3 Hz, 2H), 2.85 (t,  $J$  = 6.3 Hz, 2H), 2.51 (t,  $J$  = 7.4 Hz, 2H), 1.69 – 1.61 (m, 2H), 0.94 (t,  $J$  = 7.4 Hz, 3H) ppm.

$^{13}\text{C NMR}$  (101 MHz, Chloroform-*d*)  $\delta$  = 209.8, 198.8, 136.8, 133.2, 128.7 (2C), 128.2 (2C), 45.0, 36.3, 32.5, 17.5, 13.9 ppm.

HRMS (ESI)  $m/z$  calculated for  $\text{C}_{13}\text{H}_{17}\text{O}_2$   $[\text{M}+\text{H}]^+$ : 205.1223, found: 205.1228.

### 1-(4-(*tert*-Butyl)phenyl)heptane-1,4-dione (3ea)

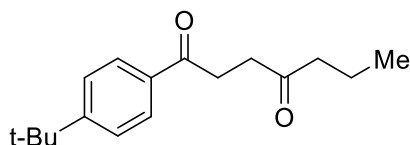

The title compound **3ea** was isolated through column chromatography (silica gel,

petroleum ether/ethyl acetate 4:1) as a pale yellow oil (38.5 mg, 74%).

$^1\text{H NMR}$  (400 MHz, Chloroform-*d*)  $\delta$  = 7.92 (d,  $J$  = 8.5 Hz, 2H), 7.47 (d,  $J$  = 8.5 Hz, 2H), 3.26 (t,  $J$  = 6.3 Hz, 2H), 2.84 (t,  $J$  = 6.3 Hz, 2H), 2.51 (t,  $J$  = 7.4 Hz, 2H), 1.71 – 1.59 (m, 2H), 1.33 (s, 9H), 0.93 (t,  $J$  = 7.4 Hz, 3H) ppm.

$^{13}\text{C NMR}$  (101 MHz, Chloroform-*d*)  $\delta$  = 209.9, 198.5, 156.9, 134.2, 128.1 (2C), 125.6 (2C), 45.0, 36.4, 35.2, 32.4, 31.2 (3C), 17.5, 13.9 ppm.

**HRMS** (ESI)  $m/z$  calculated for  $\text{C}_{17}\text{H}_{24}\text{O}_2\text{Na}$   $[\text{M}+\text{Na}]^+$ : 283.1669, found: 283.1674.

### 1-([1,1'-Biphenyl]-4-yl)heptane-1,4-dione (3fa)

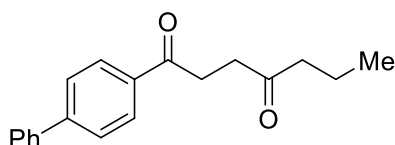

The title compound **3fa** was isolated through column chromatography (silica gel, petroleum ether/ethyl acetate 4:1) as a pale yellow oil (50.5 mg, 90%).

$^1\text{H NMR}$  (400 MHz, Chloroform-*d*)  $\delta$  = 8.05 (d,  $J$  = 8.4 Hz, 2H), 7.68 (d,  $J$  = 8.4 Hz, 2H), 7.62 (d,  $J$  = 7.3 Hz, 2H), 7.47 (t,  $J$  = 7.5 Hz, 2H), 7.39 (t,  $J$  = 7.3 Hz, 1H), 3.31 (t,  $J$  = 6.3 Hz, 2H), 2.87 (t,  $J$  = 6.3 Hz, 2H), 2.52 (t,  $J$  = 7.4 Hz, 2H), 1.71 – 1.62 (m, 2H), 0.95 (t,  $J$  = 7.4 Hz, 3H) ppm.

$^{13}\text{C NMR}$  (101 MHz, Chloroform-*d*)  $\delta$  = 209.8, 198.4, 145.9, 140.0, 135.5, 129.0 (2C), 128.8 (2C), 128.3, 127.4 (2C), 127.3 (2C), 45.0, 36.4, 32.5, 17.5, 13.9 ppm.

**HRMS** (ESI)  $m/z$  calculated for  $\text{C}_{19}\text{H}_{20}\text{O}_2\text{Na}$   $[\text{M}+\text{Na}]^+$ : 303.1356, found: 303.1355.

### 1-(4-(Pyridin-2-yl)phenyl)heptane-1,4-dione (3ga)

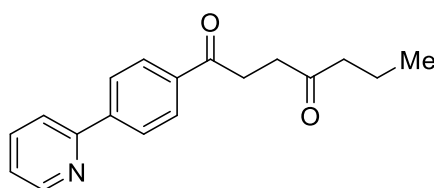

The title compound **3ga** was isolated through column chromatography (silica gel, petroleum ether/ethyl acetate 4:1) as a pale yellow oil (42.8 mg, 76%).

$^1\text{H NMR}$  (400 MHz, Chloroform-*d*)  $\delta$  = 8.70 (d,  $J$  = 4.9 Hz, 1H), 8.10 – 7.94 (m, 4H), 7.78 – 7.61 (m, 2H), 7.25 – 7.15 (m, 1H), 3.30 (t,  $J$  = 5.8 Hz, 2H), 2.85 (t,  $J$  = 5.7 Hz, 2H), 2.50 (t,  $J$  = 7.1 Hz, 2H), 1.69 – 1.58 (m, 2H), 0.92 (t,  $J$  = 7.2 Hz, 3H) ppm.

$^{13}\text{C NMR}$  (101 MHz, Chloroform-*d*)  $\delta$  = 209.8, 198.5, 156.2, 150.0, 143.7, 137.0, 136.8, 128.7 (2C), 127.1 (2C), 123.0, 121.1, 45.0, 36.3, 32.6, 17.5, 13.9 ppm.



HRMS (ESI)  $m/z$  calculated for  $C_{18}H_{19}NO_2Na$   $[M+Na]^+$ : 304.1308, found: 304.1309.

### 1-(4-Fluorophenyl)heptane-1,4-dione (**3ha**)

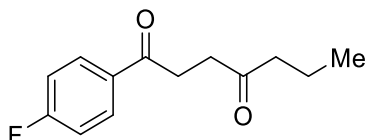

The title compound **3ha** was isolated through column chromatography (silica gel, petroleum ether/ethyl acetate 4:1) as a pale yellow oil (29.3 mg, 66%).

$^1H$  NMR (400 MHz, Chloroform-*d*)  $\delta$  = 8.00 (dd,  $J$  = 8.8, 5.4 Hz, 2H), 7.11 (dd,  $J$  = 8.6 Hz, 8.6 Hz, 2H), 3.23 (t,  $J$  = 6.1 Hz, 2H), 2.84 (t,  $J$  = 6.4 Hz, 2H), 2.50 (t,  $J$  = 7.4 Hz, 2H), 1.70 – 1.58 (m, 2H), 0.93 (t,  $J$  = 7.4 Hz, 3H) ppm.

$^{13}C$  NMR (101 MHz, Chloroform-*d*)  $\delta$  = 209.7, 197.2, 165.9 (d,  $J_{C-F}$  = 254.6 Hz), 133.2 (d,  $J_{C-F}$  = 3.0 Hz), 130.8 (d,  $J_{C-F}$  = 9.4 Hz, 2C), 115.8 (d,  $J_{C-F}$  = 21.9 Hz, 2C), 45.0, 36.3, 32.3, 17.4, 13.9 ppm.

$^{19}F$  NMR (376 MHz, Chloroform-*d*)  $\delta$  = -105.26 (s, 1F) ppm.

HRMS (ESI)  $m/z$  calculated for  $C_{13}H_{16}FO_2$   $[M+H]^+$ : 223.1129, found: 223.1133.

### 1-(4-Chlorophenyl)heptane-1,4-dione (**3ia**)

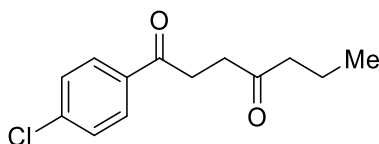

The title compound **3ia** was isolated through column chromatography (silica gel, petroleum ether/ethyl acetate 4:1) as a pale yellow oil (29.6 mg, 62%).

$^1H$  NMR (400 MHz, Chloroform-*d*)  $\delta$  = 7.91 (d,  $J$  = 8.6 Hz, 2H), 7.42 (d,  $J$  = 8.6 Hz, 2H), 3.22 (t,  $J$  = 6.1 Hz, 2H), 2.84 (t,  $J$  = 6.3 Hz, 2H), 2.49 (t,  $J$  = 7.4 Hz, 2H), 1.68 – 1.60 (m, 2H), 0.93 (t,  $J$  = 7.4 Hz, 3H) ppm.

$^{13}C$  NMR (101 MHz, Chloroform-*d*)  $\delta$  = 209.6, 197.6, 139.7, 135.2, 129.6 (2C), 129.0 (2C), 45.0, 36.3, 32.4, 17.5, 13.9 ppm.

HRMS (ESI)  $m/z$  calculated for  $C_{13}H_{16}ClO_2$   $[M+H]^+$ : 239.0833, found: 239.0840.

### 1-(4-(Trifluoromethyl)phenyl)heptane-1,4-dione (3ja)

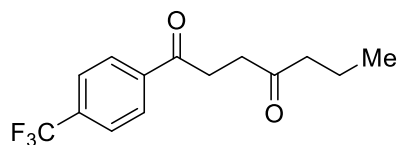

The title compound **3ja** was isolated through column chromatography (silica gel, petroleum ether/ethyl acetate 4:1) as a pale yellow oil (27.8 mg, 51%).

<sup>1</sup>H NMR (400 MHz, Chloroform-*d*)  $\delta$  = 8.08 (d,  $J$  = 8.1 Hz, 2H), 7.72 (d,  $J$  = 8.2 Hz, 2H), 3.28 (t,  $J$  = 6.1 Hz, 2H), 2.88 (t,  $J$  = 6.4 Hz, 2H), 2.51 (t,  $J$  = 7.4 Hz, 2H), 1.69 – 1.60 (m, 2H), 0.94 (t,  $J$  = 7.4 Hz, 3H) ppm.

<sup>13</sup>C NMR (101 MHz, Chloroform-*d*)  $\delta$  = 209.5, 198.0, 139.5, 134.5 (q,  $J_{C-F}$  = 32.5 Hz), 128.5 (2C), 125.8 (q,  $J_{C-F}$  = 3.7 Hz, 2C), 123.7 (q,  $J_{C-F}$  = 272.7 Hz), 44.9, 36.3, 32.7, 17.5, 13.9 ppm.

<sup>19</sup>F NMR (376 MHz, Chloroform-*d*)  $\delta$  = – 63.1 (s, 1F) ppm.

HRMS (ESI)  $m/z$  calculated for C<sub>14</sub>H<sub>16</sub>F<sub>3</sub>O<sub>2</sub> [M+H]<sup>+</sup>: 273.1097, found: 273.1104.

### 1-(4-(Methylsulfonyl)phenyl)heptane-1,4-dione (3ka)

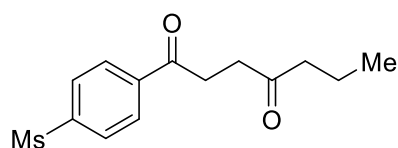

The title compound **3ka** was isolated through column chromatography (silica gel, petroleum ether/ethyl acetate 4:1) as a pale yellow oil (26.0 mg, 46%).

<sup>1</sup>H NMR (400 MHz, Chloroform-*d*)  $\delta$  = 8.14 (d,  $J$  = 8.6 Hz, 2H), 8.04 (d,  $J$  = 8.6 Hz, 2H), 3.27 (t,  $J$  = 6.0 Hz, 2H), 3.07 (s, 3H), 2.89 (t,  $J$  = 6.2 Hz, 2H), 2.50 (t,  $J$  = 7.4 Hz, 2H), 1.68 – 1.60 (m, 2H), 0.93 (t,  $J$  = 7.4 Hz, 3H) ppm.

<sup>13</sup>C NMR (101 MHz, Chloroform-*d*)  $\delta$  = 209.4, 197.8, 144.2, 140.8, 129.1 (2C), 127.9 (2C), 44.9, 44.5, 36.3, 32.8, 17.4, 13.8 ppm.

HRMS (ESI)  $m/z$  calculated for C<sub>14</sub>H<sub>19</sub>O<sub>4</sub>S [M+H]<sup>+</sup>: 283.0999, found: 283.1006.

### 4-(4-Oxoheptanoyl)benzonitrile (**3la**)

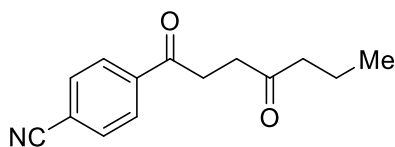

The title compound **3la** was isolated through column chromatography (silica gel, petroleum ether/ethyl acetate 4:1) as a pale yellow oil (18.8 mg, 41%).

$^1\text{H NMR}$  (400 MHz, Chloroform-*d*)  $\delta$  = 8.06 (d,  $J$  = 8.4 Hz, 2H), 7.77 (d,  $J$  = 8.4 Hz, 2H), 3.25 (t,  $J$  = 6.0 Hz, 2H), 2.88 (t,  $J$  = 6.2 Hz, 2H), 2.50 (t,  $J$  = 7.4 Hz, 2H), 1.69 – 1.59 (m, 2H), 0.93 (t,  $J$  = 7.4 Hz, 3H) ppm.

$^{13}\text{C NMR}$  (101 MHz, Chloroform-*d*)  $\delta$  = 209.4, 197.6, 139.8, 132.6 (2C), 128.6 (2C), 118.1, 116.5, 44.9, 36.3, 32.7, 17.4, 13.9 ppm.

**HRMS** (ESI)  $m/z$  calculated for  $\text{C}_{14}\text{H}_{16}\text{NO}_2$   $[\text{M}+\text{H}]^+$ : 230.1176, found: 230.1179.

### 1-(3-Methoxyphenyl)heptane-1,4-dione (**3ma**)

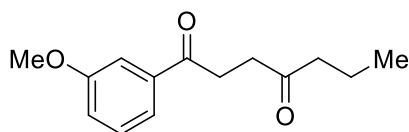

The title compound **3ma** was isolated through column chromatography (silica gel, petroleum ether/ethyl acetate 4:1) as a pale yellow oil (27.6 mg, 59%).

$^1\text{H NMR}$  (400 MHz, Chloroform-*d*)  $\delta$  = 7.57 (d,  $J$  = 7.7 Hz, 1H), 7.48 (s, 1H), 7.36 (t,  $J$  = 7.9 Hz, 1H), 7.10 (dd,  $J$  = 8.2, 2.2 Hz, 1H), 3.84 (s, 3H), 3.26 (t,  $J$  = 6.3 Hz, 2H), 2.84 (t,  $J$  = 6.3 Hz, 2H), 2.51 (t,  $J$  = 7.4 Hz, 2H), 1.70 – 1.60 (m, 2H), 0.93 (t,  $J$  = 7.4 Hz, 3H) ppm.

$^{13}\text{C NMR}$  (101 MHz, Chloroform-*d*)  $\delta$  = 209.8, 198.7, 159.9, 138.1, 129.7, 120.9, 119.8, 112.3, 55.5, 45.0, 36.3, 32.6, 17.5, 13.9 ppm.

**HRMS** (ESI)  $m/z$  calculated for  $\text{C}_{14}\text{H}_{18}\text{O}_3\text{Na}$   $[\text{M}+\text{Na}]^+$ : 257.1148, found: 257.1152.

### Methyl 3-(4-oxoheptanoyl)benzoate (**3na**)

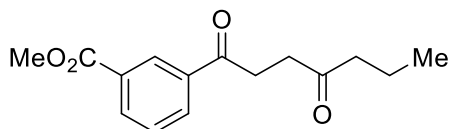

The title compound **3na** was isolated through column chromatography (silica gel,

petroleum ether/ethyl acetate 4:1) as a pale yellow oil (31.5 mg, 60%).

$^1\text{H NMR}$  (400 MHz, Chloroform-*d*)  $\delta$  = 8.62 (s, 1H), 8.22 (d,  $J$  = 7.8 Hz, 1H), 8.16 (d,  $J$  = 7.8 Hz, 1H), 7.54 (t,  $J$  = 7.8 Hz, 1H), 3.94 (s, 3H), 3.30 (t,  $J$  = 6.1 Hz, 2H), 2.87 (t,  $J$  = 6.2 Hz, 2H), 2.50 (t,  $J$  = 7.4 Hz, 2H), 1.70 – 1.59 (m, 2H), 0.93 (t,  $J$  = 7.4 Hz, 3H) ppm.

$^{13}\text{C NMR}$  (101 MHz, Chloroform-*d*)  $\delta$  = 209.6, 198.0, 166.4, 137.0, 134.0, 132.3, 130.8, 129.4, 129.0, 52.5, 45.0, 36.3, 32.6, 17.5, 13.9 ppm.

**HRMS** (ESI)  $m/z$  calculated for  $\text{C}_{15}\text{H}_{18}\text{O}_4\text{Na}$  [ $\text{M}+\text{Na}$ ] $^+$ : 285.1097, found: 285.1090.

### 1-(*o*-Tolyl)heptane-1,4-dione (**3oa**)

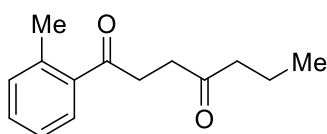

The title compound **3oa** was isolated through column chromatography (silica gel, petroleum ether/ethyl acetate 4:1) as a pale yellow oil (18.8 mg, 43%).

$^1\text{H NMR}$  (400 MHz, Chloroform-*d*)  $\delta$  = 7.73 (d,  $J$  = 7.7 Hz, 1H), 7.40 – 7.32 (m, 1H), 7.30 – 7.19 (m, 2H), 3.17 (t,  $J$  = 6.0 Hz, 2H), 2.84 (t,  $J$  = 6.4 Hz, 2H), 2.50 (t,  $J$  = 7.4 Hz, 2H), 2.47 (s, 3H), 1.68 – 1.62 (m, 2H), 0.93 (t,  $J$  = 7.4 Hz, 3H) ppm.

$^{13}\text{C NMR}$  (101 MHz, Chloroform-*d*)  $\delta$  = 209.8, 202.9, 138.1, 137.9, 132.0, 131.4, 128.6, 125.8, 44.9, 36.6, 35.3, 21.3, 17.5, 13.9 ppm.

**HRMS** (ESI)  $m/z$  calculated for  $\text{C}_{14}\text{H}_{19}\text{O}_2$  [ $\text{M}+\text{H}$ ] $^+$ : 219.1380, found: 219.1384.

### 1-(2-Fluorophenyl)heptane-1,4-dione (**3pa**)

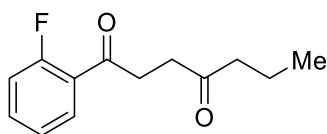

The title compound **3pa** was isolated through column chromatography (silica gel, petroleum ether/ethyl acetate 4:1) as a pale yellow oil (19.5 mg, 44%).

$^1\text{H NMR}$  (400 MHz, Chloroform-*d*)  $\delta$  = 7.86-7.84 (m, 1H), 7.56 – 7.45 (m, 1H), 7.21 (t,  $J$  = 7.9 Hz, 1H), 7.13 (dd,  $J$  = 11.2, 8.3 Hz, 1H), 3.30 – 3.24 (m, 2H), 2.83 (t,  $J$  = 6.1 Hz, 2H), 2.50 (t,  $J$  = 7.4 Hz, 2H), 1.70 – 1.60 (m, 2H), 0.93 (t,  $J$  = 7.4 Hz, 3H) ppm.

$^{13}\text{C NMR}$  (101 MHz, Chloroform-*d*)  $\delta$  = 209.7, 197.1 (d,  $J_{\text{C-F}}$  = 4.2 Hz), 162.2 (d,  $J_{\text{C-F}}$  = 255.2 Hz), 134.7 (d,  $J_{\text{C-F}}$  = 8.9 Hz), 130.7 (d,  $J_{\text{C-F}}$  = 2.8 Hz), 125.4 (d,  $J_{\text{C-F}}$  = 13.1 Hz),

124.5 (d,  $J_{C-F}$  = 3.0 Hz), 116.8 (d,  $J_{C-F}$  = 23.6 Hz), 44.9, 37.4 (d,  $J_{C-F}$  = 8.2 Hz), 36.4 (d,  $J_{C-F}$  = 2.7 Hz), 17.4, 13.9 ppm.

$^{19}\text{F}$  NMR (376 MHz, Chloroform-*d*)  $\delta$  = -109.0 (s, 1F) ppm.

HRMS (ESI)  $m/z$  calculated for  $\text{C}_{13}\text{H}_{16}\text{FO}_2$   $[\text{M}+\text{H}]^+$ : 223,1129, found: 223,1130.

### 1-(6-Chloropyridin-3-yl)heptane-1,4-dione (3qa)

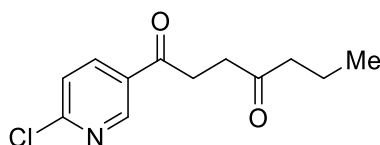

The title compound **3qa** was isolated through column chromatography (silica gel, petroleum ether/ethyl acetate 4:1) as a pale yellow oil (20.6 mg, 43%).

$^1\text{H}$  NMR (400 MHz, Chloroform-*d*)  $\delta$  = 8.96 (d,  $J$  = 2.3 Hz, 1H), 8.19 (dd,  $J$  = 8.3, 2.4 Hz, 1H), 7.43 (d,  $J$  = 8.3 Hz, 1H), 3.22 (t,  $J$  = 6.0 Hz, 2H), 2.88 (t,  $J$  = 6.4 Hz, 2H), 2.50 (t,  $J$  = 7.4 Hz, 2H), 1.67 – 1.59 (m, 2H), 0.93 (t,  $J$  = 7.4 Hz, 3H) ppm.

$^{13}\text{C}$  NMR (101 MHz, Chloroform-*d*)  $\delta$  = 209.3, 196.6, 155.8, 150.0, 138.2, 131.0, 124.6, 44.8, 36.1, 32.7, 17.4, 13.8 ppm.

HRMS (ESI)  $m/z$  calculated for  $\text{C}_{12}\text{H}_{15}\text{ClNO}_2$   $[\text{M}+\text{H}]^+$ : 240.0786, found: 240.0793.

### 1-(Thiophen-2-yl)heptane-1,4-dione (3ra)

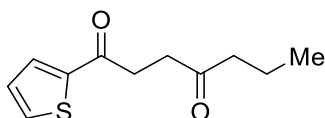

The title compound **3ra** was isolated through column chromatography (silica gel, petroleum ether/ethyl acetate 4:1) as a pale yellow oil (20.6 mg, 49%).

$^1\text{H}$  NMR (400 MHz, Chloroform-*d*)  $\delta$  = 7.76 (d,  $J$  = 3.8 Hz, 1H), 7.62 (d,  $J$  = 4.9 Hz, 1H), 7.12 (t,  $J$  = 4.0 Hz, 1H), 3.22 (t,  $J$  = 6.4 Hz, 2H), 2.84 (t,  $J$  = 6.4 Hz, 2H), 2.49 (t,  $J$  = 7.4 Hz, 2H), 1.66 – 1.60 (m, 2H), 0.92 (t,  $J$  = 7.4 Hz, 3H) ppm.

$^{13}\text{C}$  NMR (101 MHz, Chloroform-*d*)  $\delta$  = 209.6, 191.8, 143.9, 133.6, 132.1, 128.2, 45.0, 36.3, 33.0, 17.4, 13.9 ppm.

HRMS (ESI)  $m/z$  calculated for  $\text{C}_{11}\text{H}_{14}\text{O}_2\text{SNa}$   $[\text{M}+\text{Na}]^+$ : 233.0607, found: 233.0608.

### 1-Phenylnonane-3,6-dione (3sa)

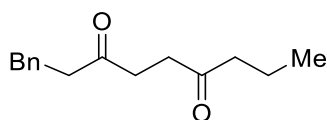

The title compound **3sa** was isolated through column chromatography (silica gel, petroleum ether/ethyl acetate 4:1) as a pale yellow oil (20.6 mg, 29%).

$^1\text{H NMR}$  (400 MHz, Chloroform-*d*)  $\delta$  = 7.24 (t,  $J$  = 7.9 Hz, 2H), 7.19 – 7.12 (m, 3H), 2.87 (t,  $J$  = 7.3 Hz, 2H), 2.77 (t,  $J$  = 7.8 Hz, 2H), 2.67 – 2.60 (m, 4H), 2.40 (t,  $J$  = 7.4 Hz, 2H), 1.62 – 1.55 (m, 2H), 0.88 (t,  $J$  = 7.4 Hz, 3H) ppm.

$^{13}\text{C NMR}$  (101 MHz, Chloroform-*d*)  $\delta$  = 209.8, 208.7, 141.2, 128.6 (2C), 128.4 (2C), 126.2, 44.8, 44.5, 36.3, 36.1, 29.8, 17.4, 13.8 ppm.

**HRMS** (ESI)  $m/z$  calculated for  $\text{C}_{15}\text{H}_{21}\text{O}_2$   $[\text{M}+\text{H}]^+$ : 233.1536, found: 233.1538.

### 1-(4-(*tert*-Butyl)phenyl)-2-methylnonane-3,6-dione (3ta)

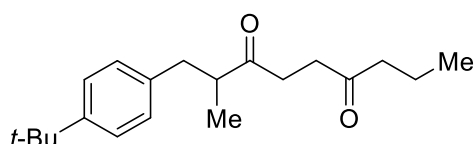

The title compound **3ta** was isolated through column chromatography (silica gel, petroleum ether/ethyl acetate 5:1) as a pale yellow oil (17.0 mg, 28%).

$^1\text{H NMR}$  (400 MHz, Chloroform-*d*)  $\delta$  = 7.29 (d,  $J$  = 8.2 Hz, 2H), 7.07 (d,  $J$  = 8.2 Hz, 2H), 3.01 – 2.95 (m, 1H), 2.89 – 2.83 (m, 1H), 2.79 – 2.74 (m, 1H), 2.70 – 2.63 (m, 1H), 2.60 – 2.50 (m, 3H), 2.43 – 2.40 (m, 2H), 1.64 – 1.57 (m, 2H), 1.30 (s, 9H), 1.10 (d,  $J$  = 6.9 Hz, 3H), 0.91 (t,  $J$  = 7.4 Hz, 3H). ppm.

$^{13}\text{C NMR}$  (101 MHz, Chloroform-*d*)  $\delta$  = 213.0, 209.8, 149.1, 136.7, 128.7 (2C), 125.4 (2C), 48.2, 44.9, 38.6, 36.0, 35.3, 34.5, 31.5 (3C), 17.4, 16.5, 13.9 ppm.

**HRMS** (ESI)  $m/z$  calculated for  $\text{C}_{20}\text{H}_{31}\text{O}_2$   $[\text{M}+\text{H}]^+$ : 303.2319, found: 303.2325.

### 1-(4-(Pyridin-2-yl)phenyl)hexane-1,4-dione (3ab)

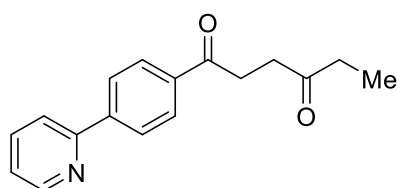

The title compound **3ab** was isolated through column chromatography (silica gel,

petroleum ether/ethyl acetate 4:1) as a pale yellow oil (31.0 mg, 58%).

**<sup>1</sup>H NMR** (400 MHz, Chloroform-*d*)  $\delta$  = 8.72 (d,  $J$  = 4.7 Hz, 1H), 8.12 – 7.96 (m, 4H), 7.78 – 7.63 (m, 2H), 7.29 – 7.23 (m, 1H), 3.33 (t,  $J$  = 6.3 Hz, 2H), 2.87 (t,  $J$  = 6.3 Hz, 2H), 2.57 (q,  $J$  = 7.3 Hz, 2H), 1.10 (t,  $J$  = 7.3 Hz, 3H) ppm.

**<sup>13</sup>C NMR** (101 MHz, Chloroform-*d*)  $\delta$  = 210.3, 198.5, 156.2, 150.0, 143.7, 137.0, 136.8, 128.7 (2C), 127.1 (2C), 123.0, 121.2, 36.2, 35.9, 32.7, 8.0 ppm.

**HRMS** (ESI)  $m/z$  calculated for C<sub>17</sub>H<sub>18</sub>NO<sub>2</sub> [M+H]<sup>+</sup>: 268.1332, found: 268.1338.

### 6-Methyl-1-(4-(pyridin-2-yl)phenyl)heptane-1,4-dione (3ac)

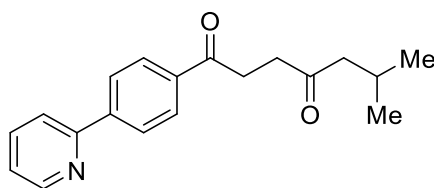

The title compound **3ac** was isolated through column chromatography (silica gel, petroleum ether/ethyl acetate 4:1) as a pale yellow oil (38.4 mg, 65%).

**<sup>1</sup>H NMR** (400 MHz, Chloroform-*d*)  $\delta$  = 8.72 (d,  $J$  = 4.7 Hz, 1H), 8.13 – 7.98 (m, 4H), 7.80 – 7.74 (m, 2H), 7.28 (t,  $J$  = 4.7 Hz, 1H), 3.31 (t,  $J$  = 6.3 Hz, 2H), 2.85 (t,  $J$  = 6.3 Hz, 2H), 2.41 (d,  $J$  = 7.0 Hz, 2H), 2.23 – 2.15 (m, 1H), 0.94 (d,  $J$  = 6.7 Hz, 6H) ppm.

**<sup>13</sup>C NMR** (101 MHz, Chloroform-*d*)  $\delta$  = 209.5, 198.4, 156.2, 150.0, 143.7, 137.0, 136.8, 128.7 (2C), 127.1 (2C), 123.0, 121.2, 52.1, 36.9, 32.5, 24.8, 22.7 (2C) ppm.

**HRMS** (ESI)  $m/z$  calculated for C<sub>19</sub>H<sub>22</sub>NO<sub>2</sub> [M+H]<sup>+</sup>: 296.1645, found: 296.1650.

### 6,6-Dimethyl-1-(4-(pyridin-2-yl)phenyl)heptane-1,4-dione (3ad)

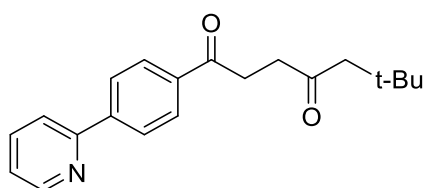

The title compound **3ad** was isolated through column chromatography (silica gel, petroleum ether/ethyl acetate 4:1) as a pale yellow oil (50.7 mg, 82%).

**<sup>1</sup>H NMR** (400 MHz, Chloroform-*d*)  $\delta$  = 8.72 (d,  $J$  = 4.7 Hz, 1H), 8.11 – 7.98 (m, 4H), 7.81 – 7.76 (m, 2H), 7.28 (t,  $J$  = 2.7 Hz, 1H), 3.27 (t,  $J$  = 6.3 Hz, 2H), 2.86 (t,  $J$  = 6.3 Hz, 2H), 2.42 (s, 2H), 1.04 (d,  $J$  = 3.1 Hz, 9H) ppm.

**<sup>13</sup>C NMR** (101 MHz, Chloroform-*d*)  $\delta$  = 209.4, 198.5, 156.2, 150.0, 143.7, 137.0, 136.9, 128.7 (2C), 127.1 (2C), 123.0, 121.2, 55.2, 38.8, 32.6, 31.2, 29.9 (3C). ppm.

**HRMS** (ESI)  $m/z$  calculated for  $C_{20}H_{24}NO_2$   $[M+H]^+$ : 310.1802, found: 310.1801.

**6-Phenyl-1-(4-(pyridin-2-yl)phenyl)hexane-1,4-dione (3ae)**

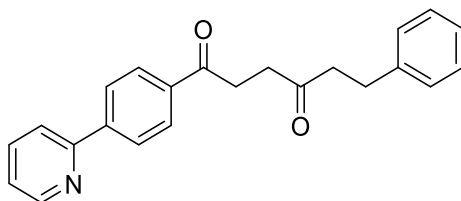

The title compound **3ae** was isolated through column chromatography (silica gel, petroleum ether/ethyl acetate 4:1) as a pale yellow oil (30.2 mg, 44%).

**$^1H$  NMR** (400 MHz, Chloroform-*d*)  $\delta$  = 8.73 (d,  $J$  = 4.8 Hz, 1H), 8.14 – 8.04 (m, 4H), 7.81 – 7.77 (m, 2H), 7.32 – 7.26 (m, 3H), 7.23 – 7.17 (m, 3H), 3.33 (t,  $J$  = 6.3 Hz, 2H), 2.99 – 2.93 (m, 2H), 2.91 – 2.84 (m, 4H) ppm.

**$^{13}C$  NMR** (101 MHz, Chloroform-*d*)  $\delta$  = 208.7, 198.3, 156.2, 150.0, 143.7, 141.2, 137.1, 136.7, 128.7 (2C), 128.6 (2C), 128.4 (2C), 127.2 (2C), 126.2, 123.1, 121.2, 44.6, 36.5, 32.7, 29.9 ppm.

**HRMS** (ESI)  $m/z$  calculated for  $C_{23}H_{22}NO_2$   $[M+H]^+$ : 344.1645, found: 344.1648.

**1-Cyclohexyl-4-(4-(pyridin-2-yl)phenyl)butane-1,4-dione (3af)**

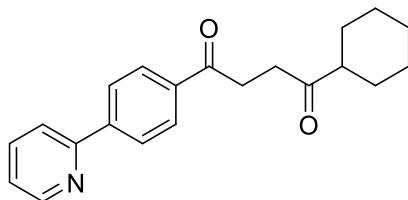

The title compound **3af** was isolated through column chromatography (silica gel, petroleum ether/ethyl acetate 4:1) as a pale yellow oil (19.3 mg, 30%).

**$^1H$  NMR** (400 MHz, Chloroform-*d*)  $\delta$  = 8.73 (d,  $J$  = 4.7 Hz, 1H), 8.13 – 8.03 (m, 4H), 7.82 – 7.76 (m, 2H), 7.32 – 7.26 (m, 1H), 3.31 (t,  $J$  = 6.8 Hz, 2H), 2.92 (t,  $J$  = 6.8 Hz, 2H), 2.53 – 2.43 (m, 1H), 1.97 – 1.90 (m, 2H), 1.84 – 1.77 (m, 2H), 1.47 – 1.35 (m, 2H), 1.35 – 1.17 (m, 4H) ppm.

**$^{13}C$  NMR** (101 MHz, Chloroform-*d*)  $\delta$  = 212.9, 198.6, 156.3, 150.0, 143.7, 137.0, 136.9, 128.7 (2C), 127.2 (2C), 123.0, 121.2, 51.1, 34.4, 32.6, 28.7 (2C), 26.0, 25.8 (2C) ppm.

**HRMS** (ESI)  $m/z$  calculated for  $C_{21}H_{24}NO_2$   $[M+H]^+$ : 322.1802, found: 322.1805.



### 1-Cyclopropyl-4-(4-(pyridin-2-yl)phenyl)butane-1,4-dione (**3ag**)

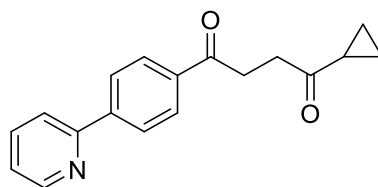

The title compound **3ag** was isolated through column chromatography (silica gel, petroleum ether/ethyl acetate 4:1) as a pale yellow oil (23.5 mg, 42%).

$^1\text{H NMR}$  (400 MHz, Chloroform-*d*)  $\delta$  = 8.72 (d,  $J$  = 4.7 Hz, 1H), 8.12 – 8.06 (m, 4H), 7.79 – 7.77 (m, 2H), 7.31 – 7.27 (m, 1H), 3.32 (t,  $J$  = 6.4 Hz, 2H), 3.06 (t,  $J$  = 6.4 Hz, 2H), 2.08 – 2.01 (m, 1H), 1.09 – 1.05 (m, 2H), 0.94 – 0.90 (m, 2H) ppm.

$^{13}\text{C NMR}$  (101 MHz, Chloroform-*d*)  $\delta$  = 209.5, 198.5, 156.2, 150.0, 143.7, 137.0, 136.9, 128.7 (2C), 127.1 (2C), 123.0, 121.2, 36.9, 32.6, 20.9, 11.0 (2C) ppm.

**HRMS** (ESI)  $m/z$  calculated for  $\text{C}_{18}\text{H}_{18}\text{NO}_2$   $[\text{M}+\text{H}]^+$ : 280.1332, found: 280.1338.

### 1-(4-(Pyridin-2-yl)phenyl)-4-(*o*-tolyl)butane-1,4-dione (**3ah**)

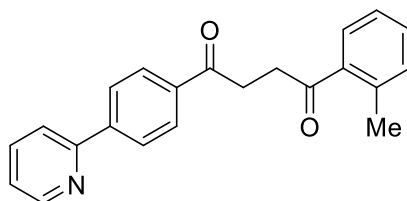

The title compound **3ah** was isolated through column chromatography (silica gel, petroleum ether/ethyl acetate 4:1) as a pale yellow oil (42.2 mg, 64%).

$^1\text{H NMR}$  (400 MHz, Chloroform-*d*)  $\delta$  = 8.69 (d,  $J$  = 4.7 Hz, 1H), 8.09 (d,  $J$  = 8.7 Hz, 2H), 8.06 (d,  $J$  = 8.7 Hz, 2H), 7.80 – 7.76 (m, 1H), 7.75 – 7.72 (m, 2H), 7.28 – 7.17 (m, 3H), 3.44 (t,  $J$  = 6.2 Hz, 2H), 3.33 (t,  $J$  = 6.1 Hz, 2H), 2.47 (s, 3H) ppm.

$^{13}\text{C NMR}$  (101 MHz, Chloroform-*d*)  $\delta$  = 202.7, 198.4, 156.2, 150.0, 143.7, 138.2, 137.9, 137.1, 136.9, 132.0, 131.5, 128.7, 128.7 (2C), 127.2 (2C), 125.8, 123.1, 121.2, 35.4, 33.1, 21.4 ppm.

**HRMS** (ESI)  $m/z$  calculated for  $\text{C}_{22}\text{H}_{19}\text{NO}_2\text{Na}$   $[\text{M}+\text{Na}]^+$ : 352.1308, found: 352.1315.

### 1-(2-Fluorophenyl)-4-(4-(pyridin-2-yl)phenyl)butane-1,4-dione (**3ai**)

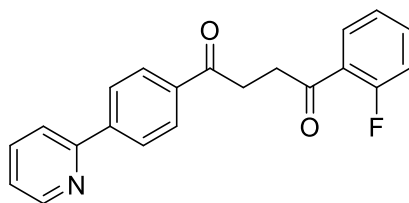

The title compound **3ai** was isolated through column chromatography (silica gel, petroleum ether/ethyl acetate 4:1) as a pale yellow oil (28.0 mg, 42%).

$^1\text{H NMR}$  (400 MHz, Chloroform-*d*)  $\delta$  = 8.73 (d,  $J$  = 4.8 Hz, 1H), 8.14 (d,  $J$  = 8.9 Hz, 2H), 8.11 (d,  $J$  = 8.8 Hz, 2H), 7.94 – 7.89 (m, 1H), 7.95 – 7.89 (m, 1H), 7.56 – 7.50 (m, 1H), 7.31 – 7.14 (m, 4H), 3.51 – 3.46 (m, 4H) ppm.

$^{13}\text{C NMR}$  (101 MHz, Chloroform-*d*)  $\delta$  = 198.3, 197.1 (d,  $J_{\text{C-F}}$  = 3.8 Hz), 162.3 (d,  $J_{\text{C-F}}$  = 255.2 Hz), 156.2, 150.0, 143.7, 137.1, 136.9, 134.8 (d,  $J_{\text{C-F}}$  = 8.9 Hz), 130.8 (d,  $J_{\text{C-F}}$  = 2.3 Hz), 128.8 (2C), 127.2 (2C), 125.6 (d,  $J_{\text{C-F}}$  = 13.1 Hz), 124.6 (d,  $J_{\text{C-F}}$  = 3.6 Hz), 123.0, 121.2, 116.8 (d,  $J_{\text{C-F}}$  = 23.6 Hz), 37.5 (d,  $J_{\text{C-F}}$  = 8.1 Hz), 32.9 (d,  $J_{\text{C-F}}$  = 2.2 Hz) ppm.

$^{19}\text{F NMR}$  (376 MHz, Chloroform-*d*)  $\delta$  = -108.9 (s, 1F) ppm.

**HRMS** (ESI)  $m/z$  calculated for  $\text{C}_{21}\text{H}_{17}\text{FNO}_2$   $[\text{M}+\text{H}]^+$ : 334.1238, found: 334.1242.

### 1-(3-Methoxyphenyl)-4-(4-(pyridin-2-yl)phenyl)butane-1,4-dione (**3aj**)

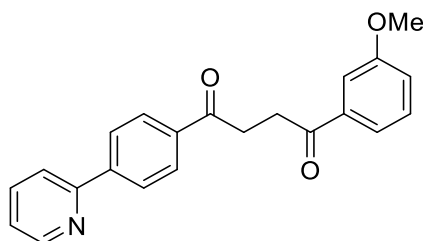

The title compound **3aj** was isolated through column chromatography (silica gel, petroleum ether/ethyl acetate 4:1) as a pale yellow oil (25.6 mg, 37%).

$^1\text{H NMR}$  (400 MHz, Chloroform-*d*)  $\delta$  = 8.74 (d,  $J$  = 4.7 Hz, 1H), 8.15 (d,  $J$  = 8.6 Hz, 2H), 8.12 (d,  $J$  = 8.5 Hz, 2H), 7.82 – 7.75 (m, 2H), 7.65 (d,  $J$  = 7.6 Hz, 1H), 7.56 (s, 1H), 7.40 (t,  $J$  = 7.9 Hz, 1H), 7.33 – 7.26 (m, 1H), 7.13 (dd,  $J$  = 8.1, 2.6 Hz, 1H), 3.86 (s, 3H), 3.53 – 3.45 (m, 4H) ppm.

$^{13}\text{C NMR}$  (101 MHz, Chloroform-*d*)  $\delta$  = 198.7, 198.5, 160.0, 156.3, 150.1, 143.8, 138.3, 137.1, 136.9, 129.8, 128.8 (2C), 127.2 (2C), 123.1, 121.2, 121.0, 119.9, 112.4, 55.6, 32.9 (2C) ppm.

**HRMS** (ESI)  $m/z$  calculated for  $\text{C}_{22}\text{H}_{20}\text{NO}_3$   $[\text{M}+\text{H}]^+$ : 346.1438, found: 346.1443.

### 1-(3-Chlorophenyl)-4-(4-(pyridin-2-yl)phenyl)butane-1,4-dione (**3ak**)

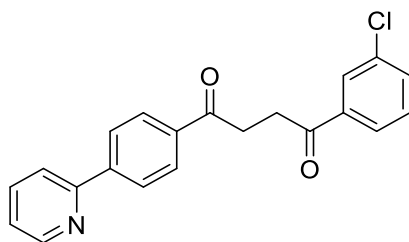

The title compound **3ak** was isolated through column chromatography (silica gel, petroleum ether/ethyl acetate 4:1) as a pale yellow oil (21.0 mg, 30%).

<sup>1</sup>H NMR (400 MHz, Chloroform-*d*)  $\delta$  = 8.73 (d,  $J$  = 4.7 Hz, 1H), 8.15 – 8.10 (m, 4H), 8.02 (s, 1H), 7.93 (d,  $J$  = 7.7 Hz, 1H), 7.82 – 7.77 (m, 2H), 7.55 (d,  $J$  = 7.8 Hz, 1H), 7.43 (t,  $J$  = 7.9 Hz, 1H), 7.31 – 7.27 (m, 1H), 3.51 (t,  $J$  = 6.3 Hz, 2H), 3.44 (t,  $J$  = 6.2 Hz, 2H) ppm.

<sup>13</sup>C NMR (101 MHz, Chloroform-*d*)  $\delta$  = 198.2, 197.6, 156.2, 150.1, 143.9, 138.5, 137.1, 136.8, 135.1, 133.2, 130.1, 128.8 (2C), 128.4, 127.2 (2C), 126.4, 123.1, 121.2, 32.8 (2C) ppm.

HRMS (ESI)  $m/z$  calculated for C<sub>21</sub>H<sub>17</sub>ClNO<sub>2</sub> [M+H]<sup>+</sup>: 350.0942, found: 350.0946.

### 1-(4-Methoxyphenyl)-4-(4-(pyridin-2-yl)phenyl)butane-1,4-dione (**3al**)

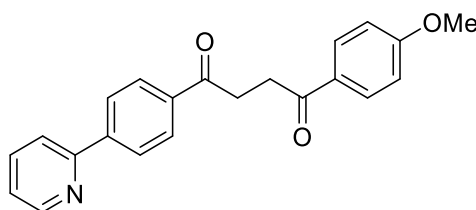

The title compound **3al** was isolated through column chromatography (silica gel, petroleum ether/ethyl acetate 4:1) as a pale yellow oil (22.1 mg, 32%).

<sup>1</sup>H NMR (400 MHz, Chloroform-*d*)  $\delta$  = 8.72 (d,  $J$  = 4.7 Hz, 1H), 8.13 (d,  $J$  = 8.7 Hz, 2H), 8.10 (d,  $J$  = 8.7 Hz, 2H), 8.02 (d,  $J$  = 8.9 Hz, 2H), 7.81 – 7.75 (m, 2H), 7.28 (t,  $J$  = 4.0 Hz, 1H), 6.94 (d,  $J$  = 8.9 Hz, 2H), 3.86 (s, 3H), 3.51 – 3.45 (m, 1H), 3.45 – 3.40 (m, 1H) ppm.

<sup>13</sup>C NMR (101 MHz, Chloroform-*d*)  $\delta$  = 198.7, 197.3, 163.6, 156.2, 150.0, 143.7, 137.0, 136.9, 130.5 (2C), 129.9, 128.7 (2C), 127.1 (2C), 123.0, 121.1, 113.8 (2C), 55.6, 32.9, 32.3 ppm.

HRMS (ESI)  $m/z$  calculated for C<sub>22</sub>H<sub>20</sub>NO<sub>3</sub> [M+H]<sup>+</sup>: 346.1438, found: 346.1439.

**1-(4-(Pyridin-2-yl)phenyl)-4-(thiophen-2-yl)butane-1,4-dione (3am)**

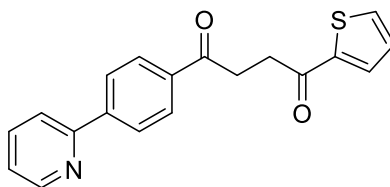

The title compound **3am** was isolated through column chromatography (silica gel, petroleum ether/ethyl acetate 4:1) as a pale yellow oil (25.1 mg, 39%).

**<sup>1</sup>H NMR** (400 MHz, Chloroform-*d*)  $\delta$  = 8.72 (d,  $J$  = 4.8 Hz, 1H), 8.14 – 8.09 (m, 4H), 7.84 (d,  $J$  = 3.8 Hz, 1H), 7.79 (d,  $J$  = 4.2 Hz, 2H), 7.65 (d,  $J$  = 4.9 Hz, 1H), 7.29 (t,  $J$  = 4.4 Hz, 1H), 7.15 (t,  $J$  = 4.4 Hz, 1H), 3.50 (t,  $J$  = 6.4 Hz, 2H), 3.42 (t,  $J$  = 6.3 Hz, 2H) ppm.

**<sup>13</sup>C NMR** (101 MHz, Chloroform-*d*)  $\delta$  = 198.2, 191.8, 156.2, 150.0, 144.0, 143.8, 137.1, 136.8, 133.7, 132.2, 128.7 (2C), 128.3, 127.2 (2C), 123.1, 121.2, 33.3, 32.9 ppm.

**HRMS** (ESI)  $m/z$  calculated for C<sub>19</sub>H<sub>15</sub>NO<sub>2</sub>SNa [M+Na]<sup>+</sup>: 344.0716, found: 344.0722.

## Procedures for 1 mmol Scale Synthesis of **3a**

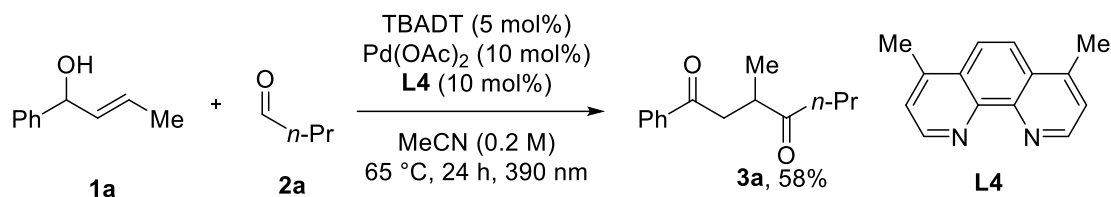

TBADT (tetrabutylammonium decatungstate) (166 mg, 0.05 mmol, 5 mol%), Pd(OAc)<sub>2</sub> (22.5 mg, 0.1 mmol, 10 mol%), Ligand **L4** (21 mg, 0.1 mmol, 10 mol%), The tube was evacuated and filled with argon (three cycles). To these solids, dry MeCN (5 mL, 0.2 M) was added under argon atmosphere. Next, aldehydes **2a** (216 mg, 3.0 mmol, 3.0 equiv) and allylic alcohols **1a** (148 mg, 1.0 mmol, 1.0 equiv) were added, sequentially. Subsequently, the reaction mixture was stirred and irradiated using two 34 W 390 nm LED lamps (Kessil PR160-390, 5 cm away to keep the reaction maintain 65 °C) for 24h. After exposing to air for 15 minutes, the reaction mixture was filtered through a pad of silica gel and concentrated under reduced pressure. The residue was purified through column chromatography (silica gel, petroleum ether/ethyl acetate 10:1) to afford the desired products **3a** as a pale yellow oil (127 mg, 58%).

## Procedures for Derivatizations of the Cross-Coupling Product

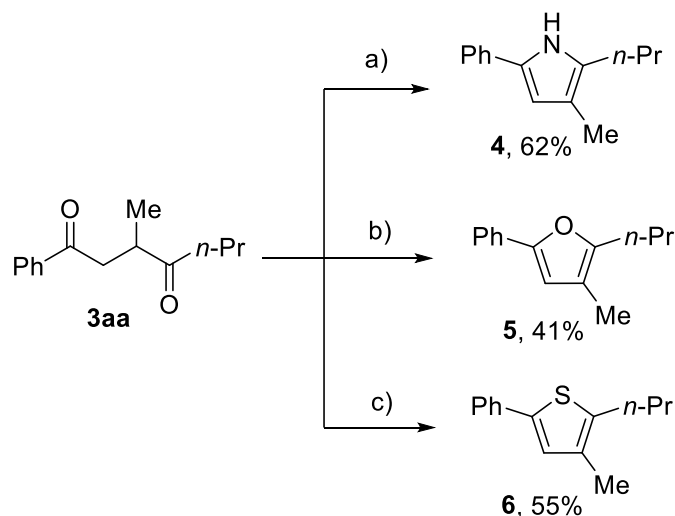

a)  $\text{NH}_4\text{OAc}$ , AcOH, Reflux, 20 h; b) TfOH,  $\text{CH}_3\text{CN}$ , 85 °C;  
c) Lawesson reagent (1.5 equiv), THF, 55 °C, 24 h.

**Procedure a):** A mixture of the 1,4-diketone **3aa** (0.40 mmol, 87.2 mg, 1.0 equiv), ammonium acetate (2.4 mmol, 186 mg, 6.0 equiv), and acetic acid (0.1 M, 4 mL) was heated under reflux for 20 h. After cooling down, the reaction mixture was poured into ice-water. The aqueous layer was extracted three times with EtOAc. The combined organic layers were washed with brine, dried over  $\text{Na}_2\text{SO}_4$ , filtered, and concentrated under reduced pressure. The residue was purified through column chromatography (silica gel, petroleum ether/ethyl acetate 1:1) to afford 3-methyl-5-phenyl-2-propyl-1H-pyrrole (**4**) in 62% yield (49.4 mg) as a yellow oil.  $^1\text{H NMR}$  (400 MHz, Chloroform-*d*)  $\delta$  = 7.43 (d,  $J$  = 7.3 Hz, 2H), 7.34 (t,  $J$  = 7.8 Hz, 2H), 7.16 (t,  $J$  = 7.3 Hz, 1H), 6.32 (d,  $J$  = 2.8 Hz, 1H), 2.59 (t,  $J$  = 7.6 Hz, 2H), 2.09 (s, 3H), 1.69 – 1.62 (m, 2H), 1.00 (t,  $J$  = 7.3 Hz, 3H) ppm.  $^{13}\text{C NMR}$  (101 MHz, Chloroform-*d*)  $\delta$  = 133.2, 130.2, 129.3, 128.9 (2C), 125.5, 123.3 (2C), 116.2, 108.0, 28.2, 23.4, 14.0, 11.1 ppm. **HRMS** (ESI)  $m/z$  calculated for  $\text{C}_{14}\text{H}_{18}\text{N}$   $[\text{M}+\text{H}]^+$ : 200.1434, found: 200.1436.

**Procedure b):** To a dry Schlenk tube that charged with nitrogen, 1,4-diketone **3aa** (0.40 mmol, 87.2 mg, 1.0 equiv) was added,  $\text{CH}_3\text{CN}$  (0.1 M, 4.0 mL) was injected through a syringe. Subsequently, triflic acid (60 mg, 0.40 mmol, 1.0 equiv) was added to the mixture, and the resulting solution was stirred at 85 °C for 1 h. Next, the resulting solution was cooled to room temperature, and solvent was evaporated under vacuum. The residue was purified by flash column chromatography on silica gel (eluent: ethyl acetate/ petroleum ether 20:1) to afford 3-methyl-5-phenyl-2-propylfuran (**5**) in 41%

yield (31.1 mg) as a yellow oil. **<sup>1</sup>H NMR** (400 MHz, Chloroform-*d*)  $\delta$  = 7.61 (d,  $J$  = 7.3 Hz, 2H), 7.35 (t,  $J$  = 7.8 Hz, 2H), 7.20 (t,  $J$  = 7.4 Hz, 1H), 6.45 (s, 1H), 2.60 (t,  $J$  = 7.3 Hz, 2H), 2.00 (s, 3H), 1.74 – 1.64 (m, 2H), 0.97 (t,  $J$  = 7.4 Hz, 3H) ppm. **<sup>13</sup>C NMR** (101 MHz, Chloroform-*d*)  $\delta$  = 151.5, 150.9, 131.4, 128.7 (2C), 126.6, 123.3 (2C), 116.2, 108.4, 28.1, 22.1, 13.9, 10.1 ppm. **HRMS** (ESI)  $m/z$  calculated for C<sub>14</sub>H<sub>17</sub>O [M+H]<sup>+</sup>: 201.1274, found: 201.1276.

Procedure c): To a dry Schlenk tube charged with nitrogen, the 1,4-diketone **3aa** (0.40 mmol, 87.2 mg, 1.0 equiv), THF (8.0 mL), and lawesson reagent (242 mg, 0.60 mmol, 1.5 equiv) were added successively. Subsequently, the resulting solution was stirred at 55 °C for 24 h, before it was cooled to room temperature. After evaporating the volatiles under vacuum, the residue was purified by flash column chromatography on silica gel (eluent: petroleum ether) to afford *3-methyl-5-phenyl-2-propylthiophene* (**6**) in 55% yield (47.6 mg) as a yellow oil. **<sup>1</sup>H NMR** (400 MHz, Chloroform-*d*)  $\delta$  = 7.60 – 7.57 (m, 2H), 7.39 – 7.35 (m, 2H), 7.29 – 7.24 (m, 1H), 7.06 (s, 1H), 2.75 (t,  $J$  = 7.6 Hz, 2H), 2.21 (s, 3H), 1.77 – 1.69 (m, 2H), 1.05 (t,  $J$  = 7.3 Hz, 3H) ppm. **<sup>13</sup>C NMR** (101 MHz, Chloroform-*d*)  $\delta$  = 139.5, 138.8, 134.9, 133.7, 128.9 (2C), 126.9, 126.1, 125.4 (2C), 30.2, 24.8, 14.0, 13.9 ppm. **HRMS** (ESI)  $m/z$  calculated for C<sub>14</sub>H<sub>17</sub>S [M+H]<sup>+</sup>: 217.1045, found: 217.1049.

## Control Experiments

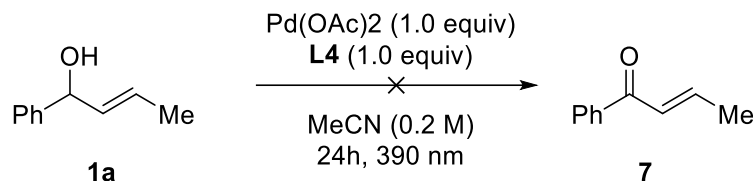

$\text{Pd}(\text{OAc})_2$  (45 mg, 0.2 mmol, 1.0 equiv), Ligand **L4** (42 mg, 0.2 mmol, 1.0 equiv), allylic alcohols **1a** (29.6 mg, 0.2 mmol, 1.0 equiv) were placed in a tube equipped with a stir bar. The tube was evacuated and filled with nitrogen (three cycles). To these solids, dry MeCN (1 mL, 0.2 M) was added under nitrogen atmosphere. Subsequently, the reaction mixture was stirred and irradiated using two 34 W 390 nm LED lamps (Kessil PR160-390, 5 cm away to keep the reaction maintain 65 °C) for 24h. After exposing to air for 15 minutes, the reaction mixture was filtered through a pad of silica gel and concentrated under reduced pressure. The formation of **7** was not observed.

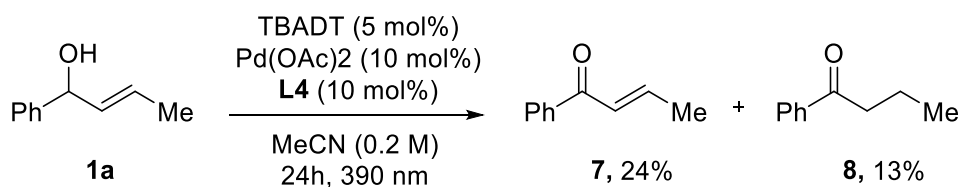

TBADT (tetrabutyl ammonium decatungstate) (66.4 mg, 0.02 mmol, 5 mol%),  $\text{Pd}(\text{OAc})_2$  (9.0 mg, 0.04 mmol, 10 mol%), Ligand **L4** (8.4 mg, 0.04 mmol, 10 mol%), allylic alcohols **1a** (59.2 mg, 0.4 mmol, 1.0 equiv) were placed in a tube equipped with a stir bar. The tube was evacuated and filled with nitrogen (three cycles). To these solids, dry MeCN (2 mL, 0.2 M) was added under nitrogen atmosphere. Subsequently, the reaction mixture was stirred and irradiated using two 34 W 390 nm LED lamps (Kessil PR160-390, 5 cm away to keep the reaction maintain 65 °C) for 24h. After exposing to air for 15 minutes, the reaction mixture was filtered through a pad of silica gel and concentrated under reduced pressure. The residue was purified through column chromatography (silica gel, petroleum ether/ethyl acetate) to afford (*E*)-1-phenylbut-2-en-1-one (**6**) as a colorless oil (14.2 mg, 24%) and 1-phenylbutan-1-one (**8**) as a colorless oil (7.6 mg, 13%). The NMR data of **7**<sup>3</sup> or **8**<sup>4</sup> are consistent with the reported literature.



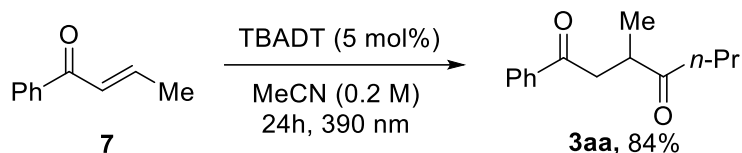

TBADT (tetrabutyl ammonium decatungstate) (33.2 mg, 0.01 mmol, 5 mol%), (*E*)-1-phenylbut-2-en-1-one (**7**) (29.2 mg, 0.2 mmol, 1.0 equiv) were placed in a tube equipped with a stir bar. The tube was evacuated and filled with nitrogen (three cycles). To these solids, dry MeCN (1 mL, 0.2 M) was added under nitrogen atmosphere. Subsequently, the reaction mixture was stirred and irradiated using two 34 W 390 nm LED lamps (Kessil PR160-390, 5 cm away to keep the reaction maintain 65 °C) for 24h. After exposing to air for 15 minutes, the reaction mixture was filtered through a pad of silica gel and concentrated under reduced pressure. The residue was purified through column chromatography (silica gel, petroleum ether/ethyl acetate) to afford 3-methyl-1-phenylheptane-1,4-dione (**3aa**) as a colorless oil (36.7 mg, 84%) .

## References

1. Perry, I. B.; Brewer, T. F.; Sarver, P. J.; Schultz, D. M.; Dirocco, D. A.; MacMillan, D. W. C. Direct Arylation of Strong Aliphatic C–H Bonds. *Nature* **2018**, *560*, 70–75.
2. (a) Fuchter, M. J.; Levy, J.-N.; One-Pot Formation of Allylic Chlorides from Carbonyl Derivatives. *Org. Lett.* **2008**, *10*, 4919–4922. (b) Miura, K.; Wang, D.; Hosomi, A. Highly Diastereoselective Hydrostannylation of Allyl and Homoallyl Alcohols with Dibutyl(trifluoromethanesulfoxy)stannane. *J. Am. Chem. Soc.* **2005**, *127*, 9366–9367. (c) Farndon, J. J.; Young, T. A.; Bower, J. F. Stereospecific Alkene Aziridinization Using a Bifunctional Amino-Reagent: An Aza-Prilezhaev Reaction. *J. Am. Chem. Soc.* **2018**, *140*, 17846–17850. (d) Lafrance, M.; Roggen, M.; Carreira, E. M. Direct, Enantioselective Iridium-Catalyzed Allylic Amination of Racemic Allylic Alcohols. *Angew. Chem., Int. Ed.* **2012**, *51*, 3470–3473. (e) Musacchio, A.; Nguyen, L.; Beard, G.; Knowles, R. Catalytic Olefin Hydroamination with Aminium Radical Cations: a Photoredox Method for Direct C–N Bond Formation. *J. Am. Chem. Soc.* **2014**, *136*, 12217–12220. (f) Wang, Y.; Kang, Q. Palladium-Catalyzed Allylic Esterification *via* C–C Bond Cleavage of a Secondary Homoallyl Alcohol. *Org. Lett.* **2014**, *16*, 4190–4193. (g) Liao, J.; Zhang, Z.; Tang, X.; Wu, W. Palladium-Catalyzed Desulfitative Oxidative Coupling between Arenesulfinic Acid Salts and Allylic Alcohols: A Strategy for the Selective Construction of  $\beta$ -Aryl Ketones and Aldehydes. *J. Org. Chem.* **2015**, *80*, 8903–8909.
3. Phillips, E. M.; Riedrich, M.; Scheidt, K. *N*-Heterocyclic Carbene-Catalyzed Conjugate Additions of Alcohols. *J. Am. Chem. Soc.* **2010**, *132*, 13179–13181.
4. Dong, W.; Yang, H.; Yang, W.; Zhao, W. Rhodium-Catalyzed Remote Isomerization of Alkenyl Alcohols to Ketones. *Org. Lett.* **2020**, *22*, 1265–1269.

# $^1\text{H}$ , $^{13}\text{C}$ and $^{19}\text{F}$ -Spectra

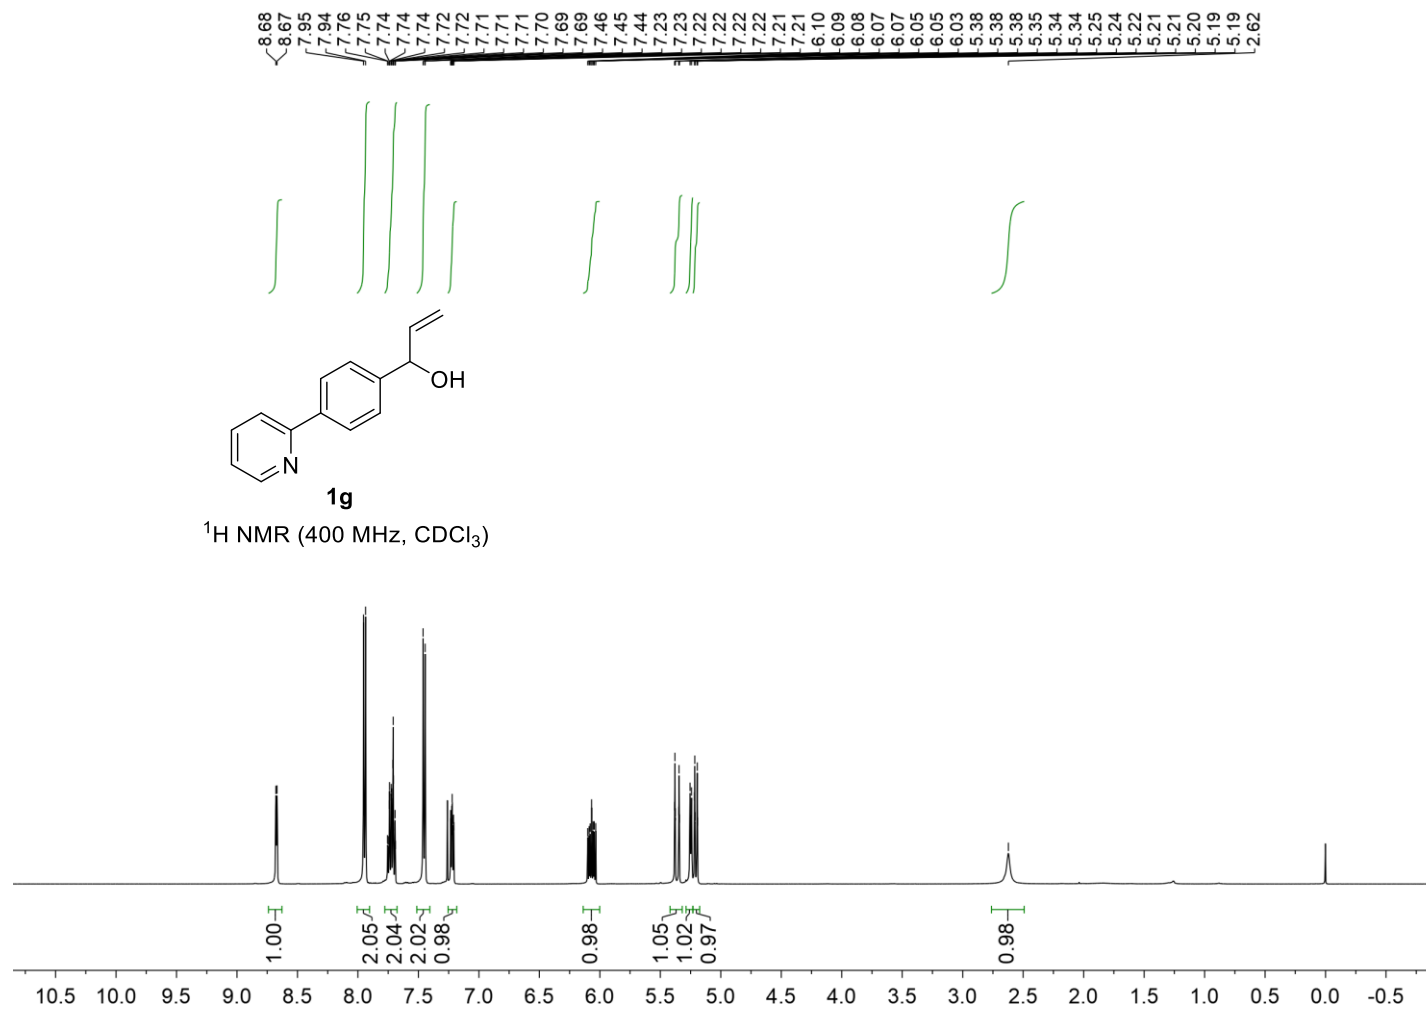

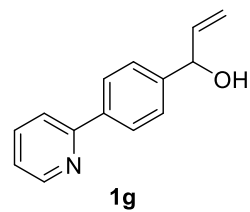

$^{13}\text{C}$  NMR (101 MHz,  $\text{CDCl}_3$ )

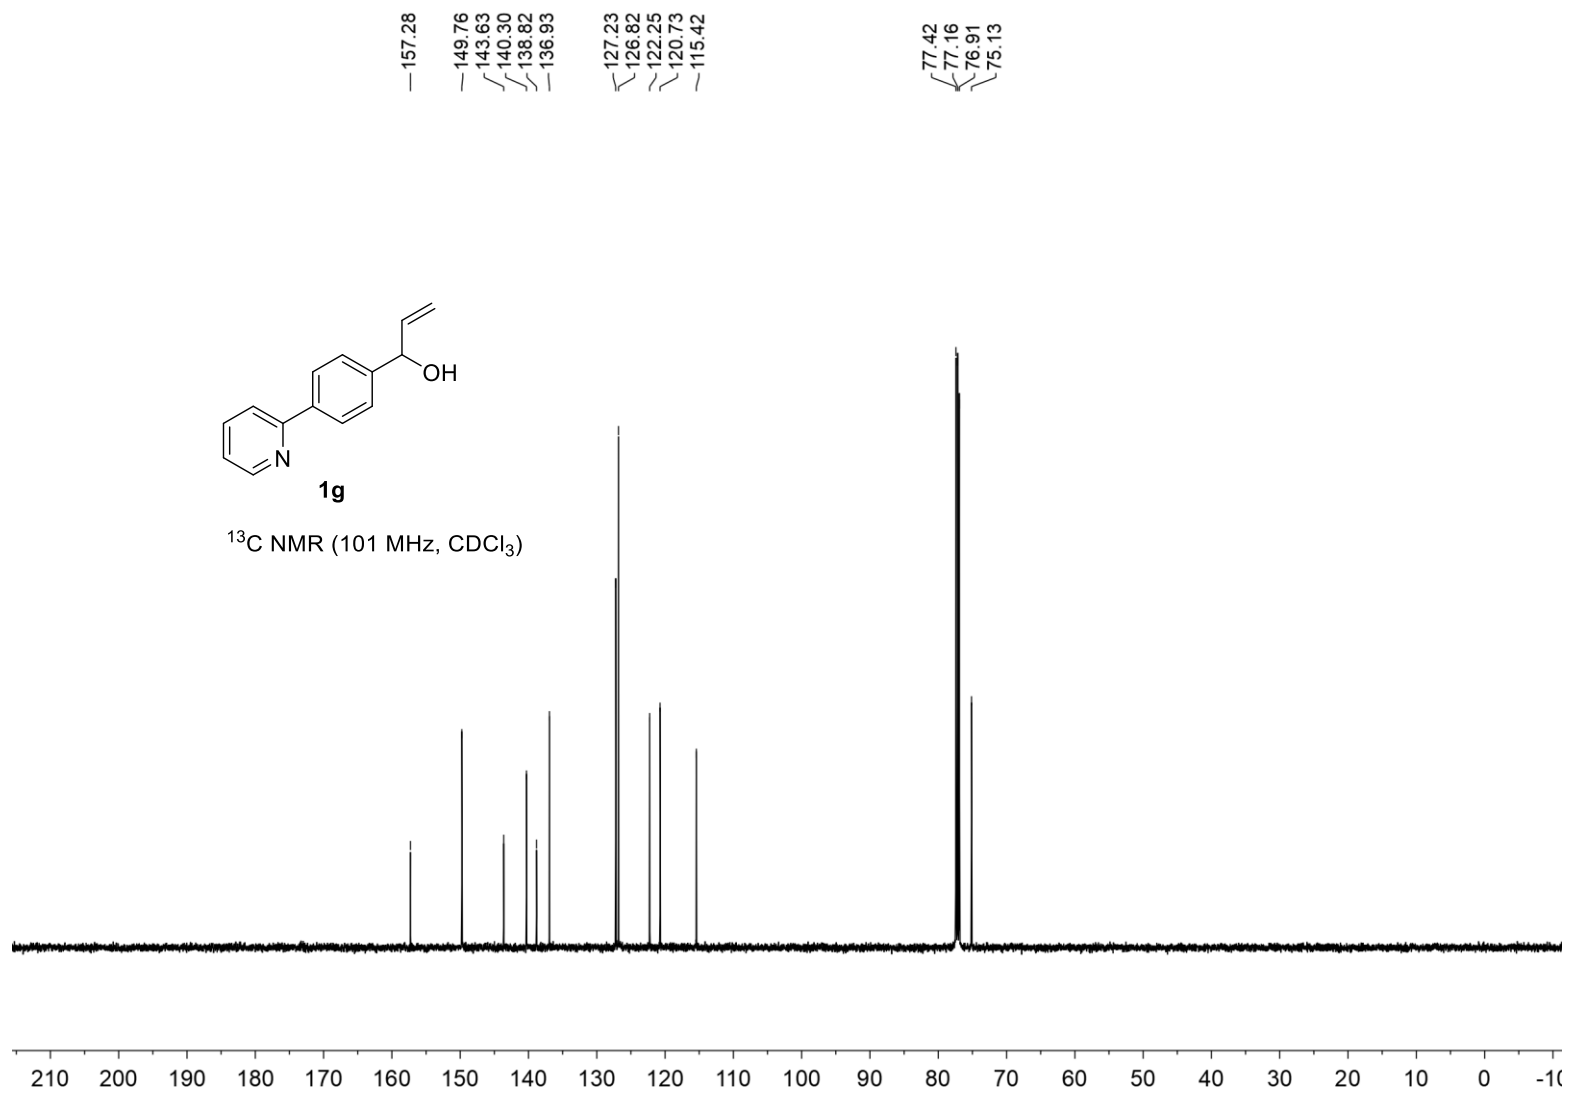

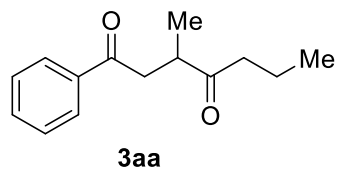

<sup>1</sup>H NMR (400 MHz, CDCl<sub>3</sub>)

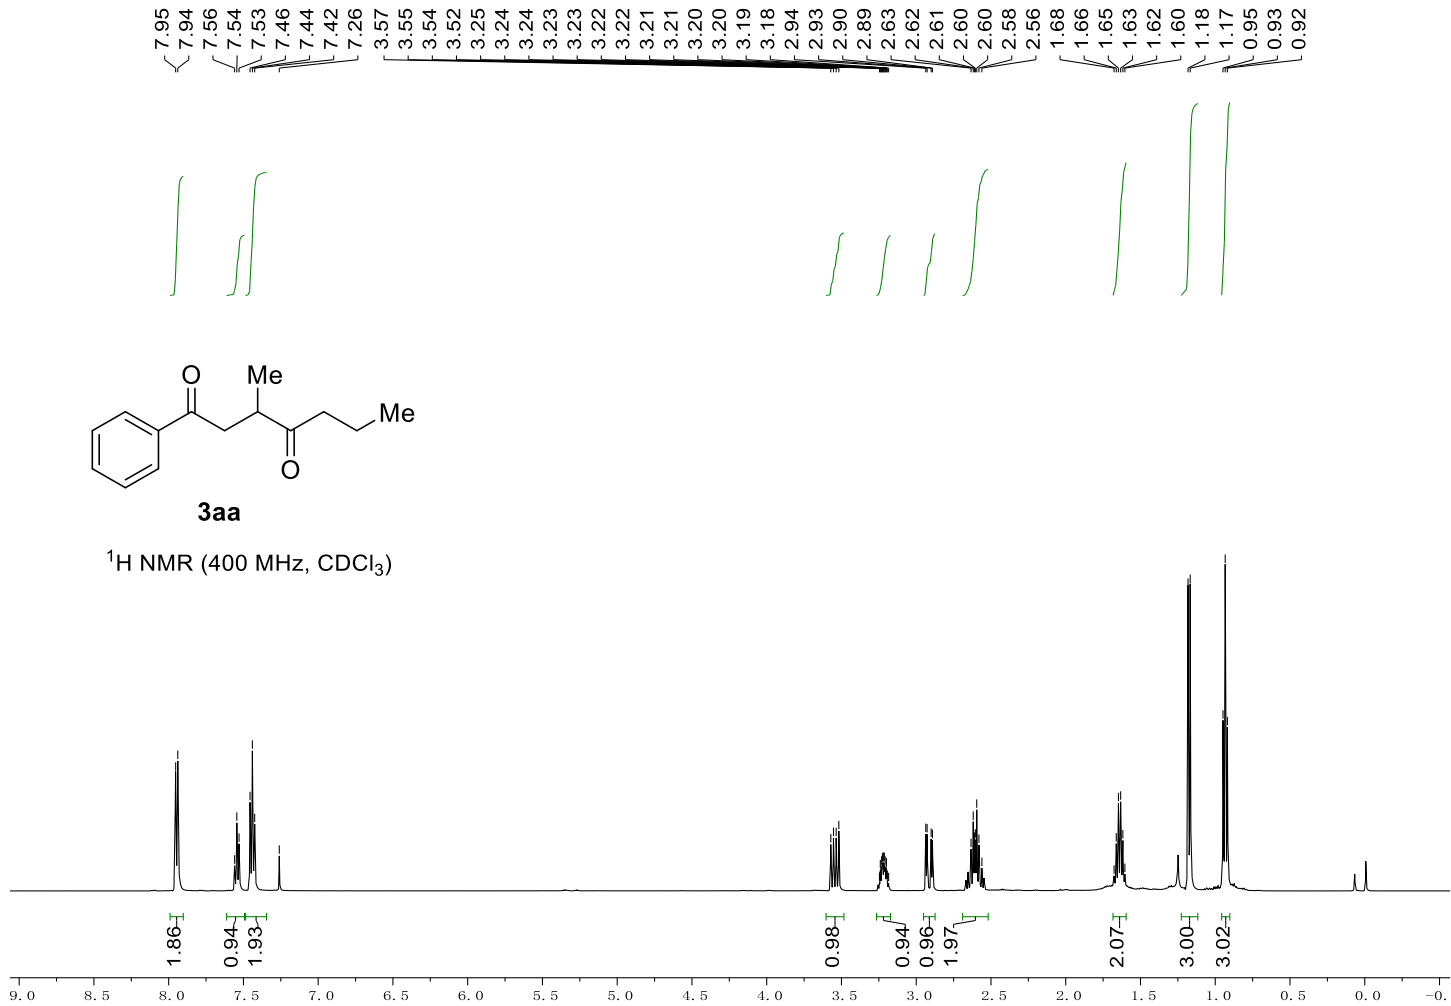

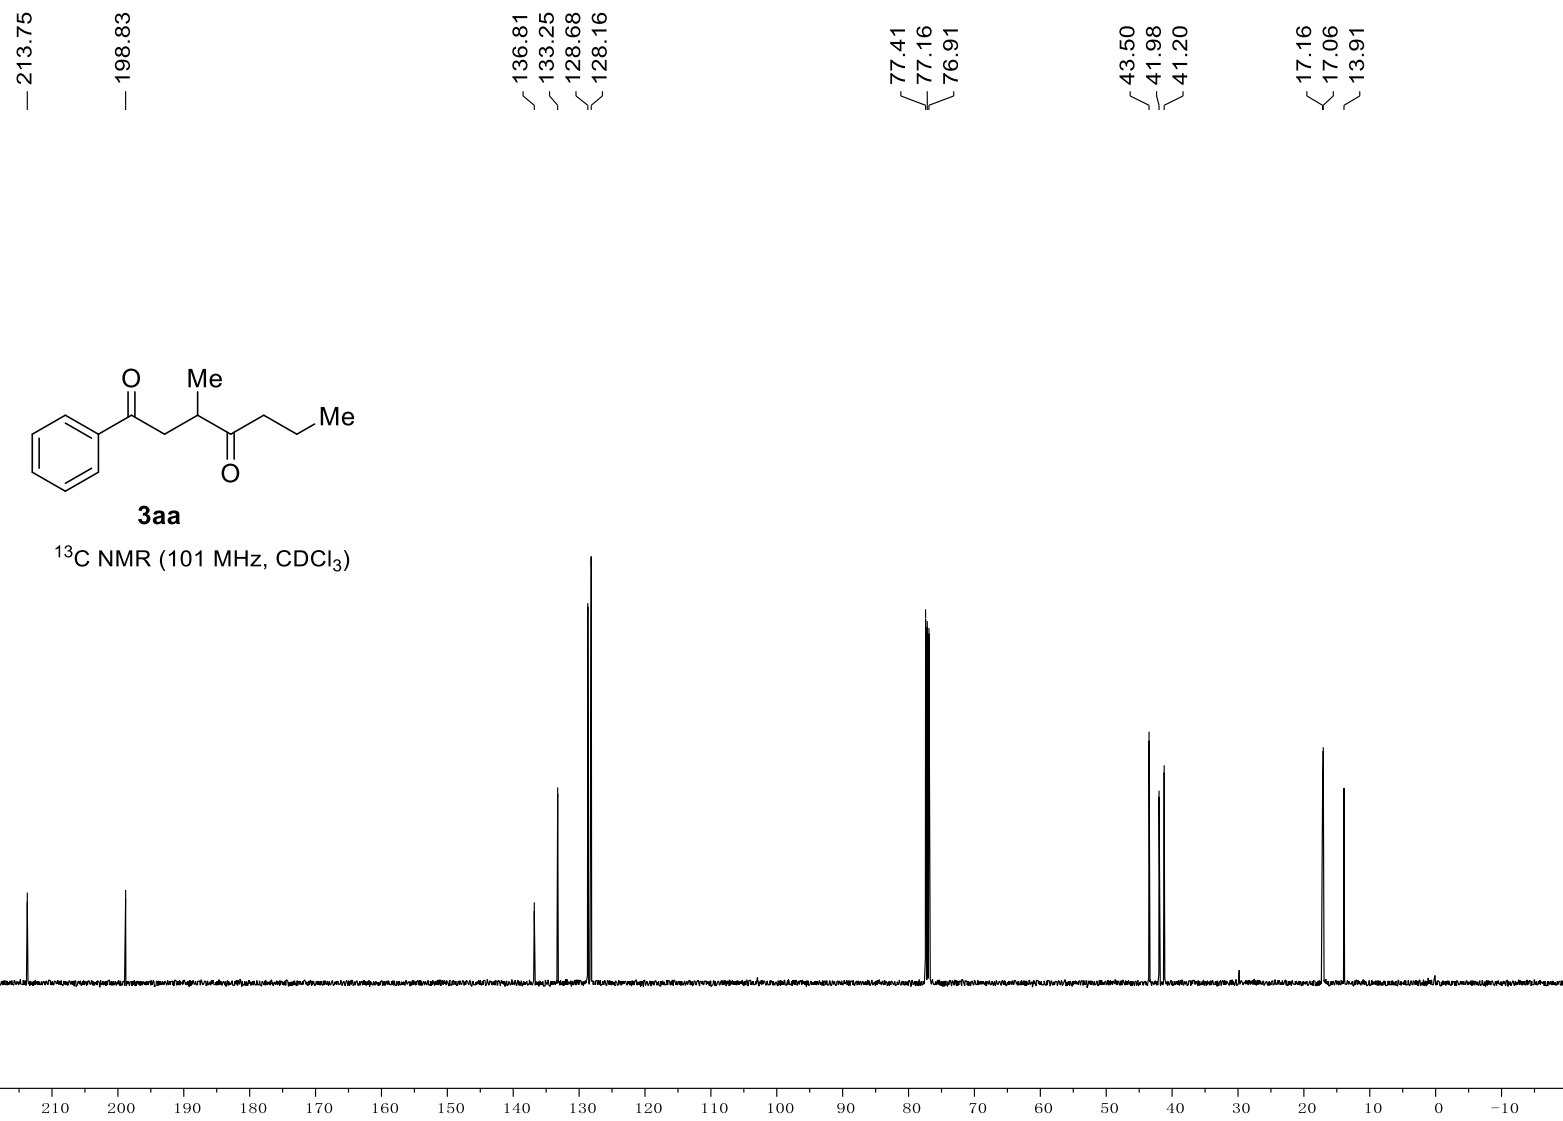

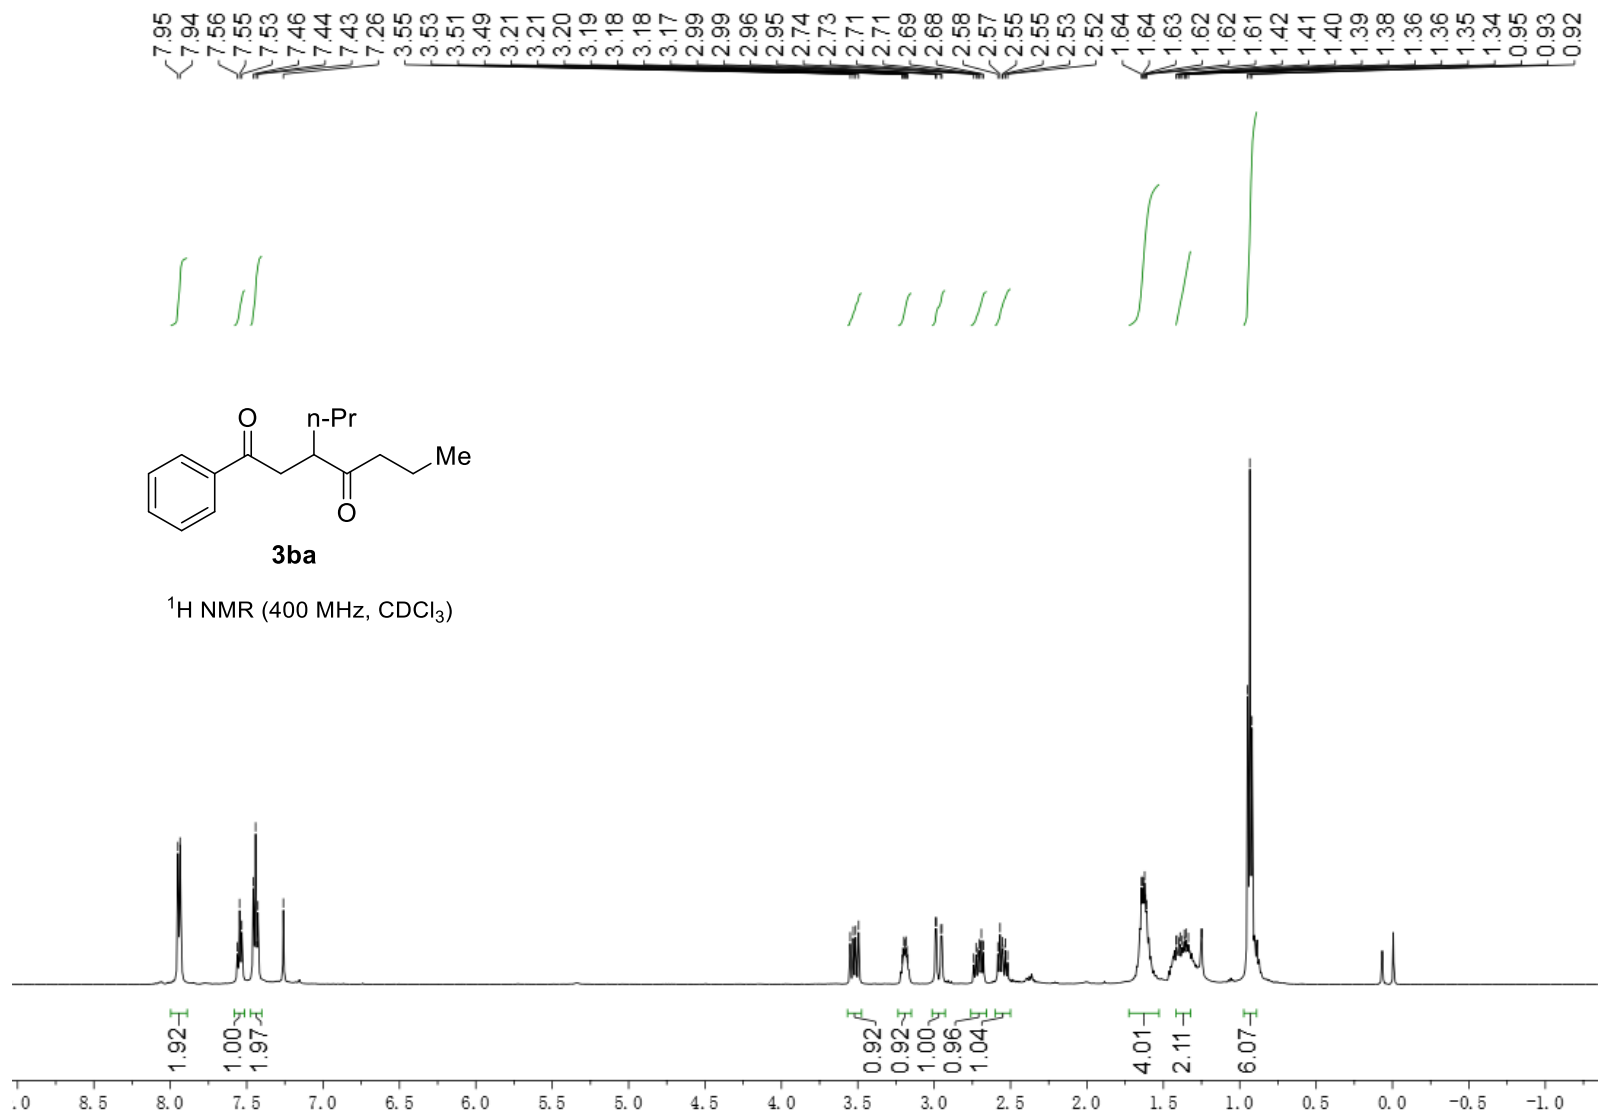

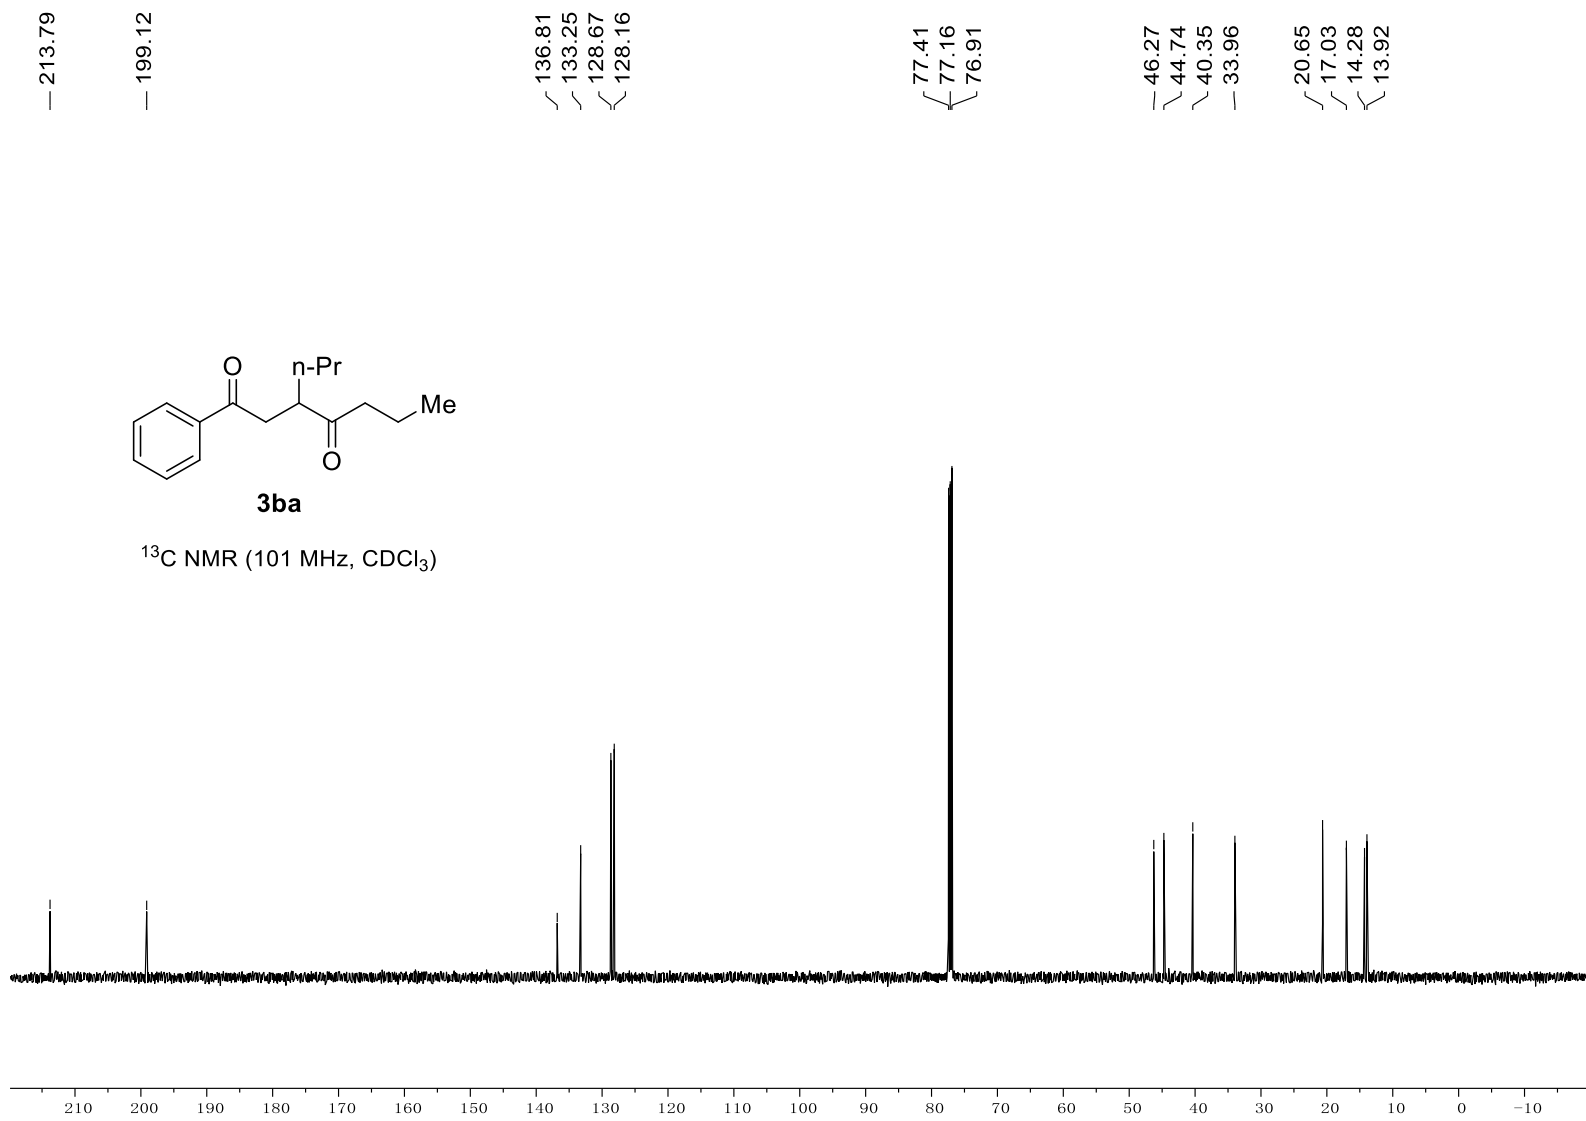



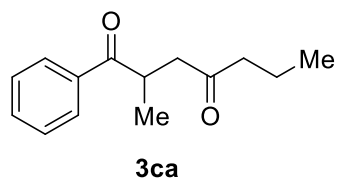

$^1\text{H NMR}$  (400 MHz,  $\text{CDCl}_3$ )

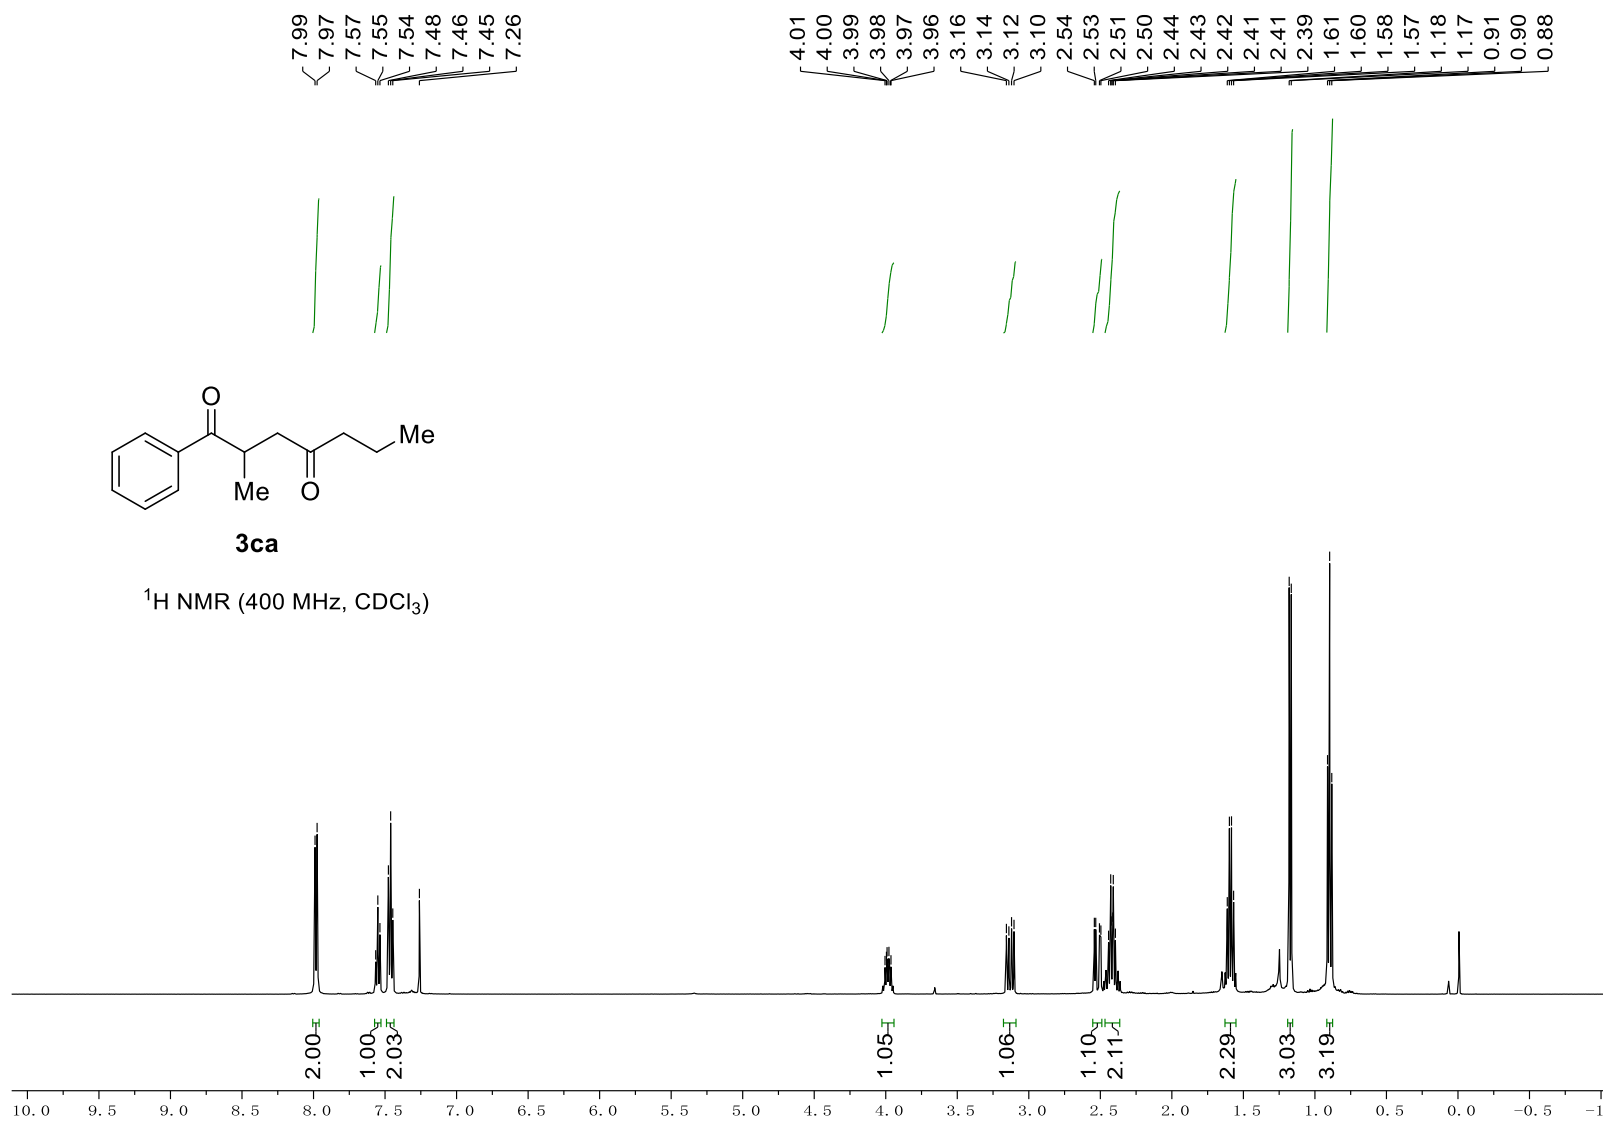

— 209.68  
— 203.57

— 136.14  
— 133.07  
— 128.75  
— 128.58

— 77.42  
— 77.16  
— 76.91

— 46.18  
— 44.97  
— 36.22

— 17.91  
— 17.32  
— 13.84

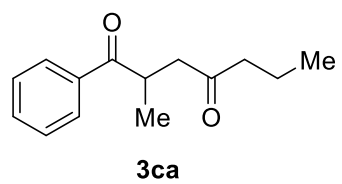

$^{13}\text{C}$  NMR (101 MHz,  $\text{CDCl}_3$ )

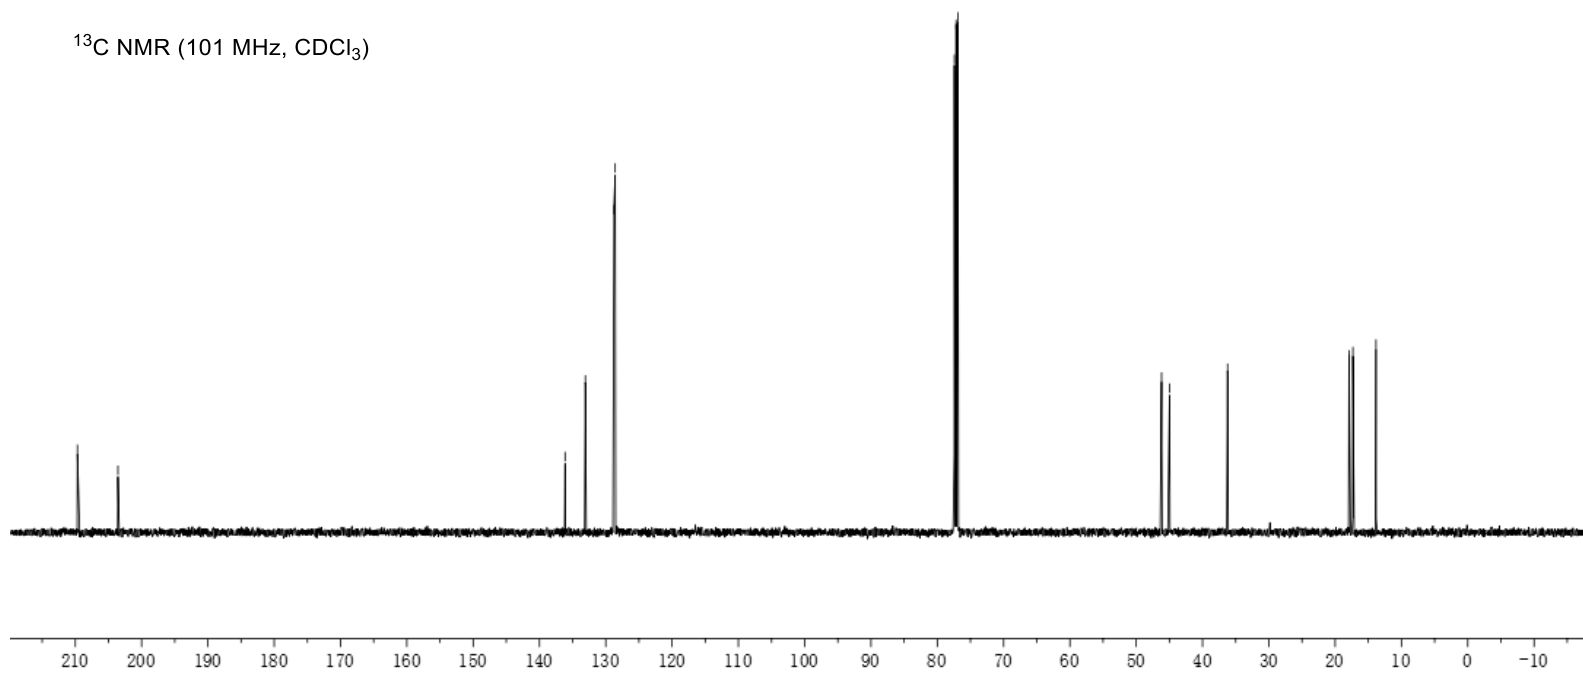

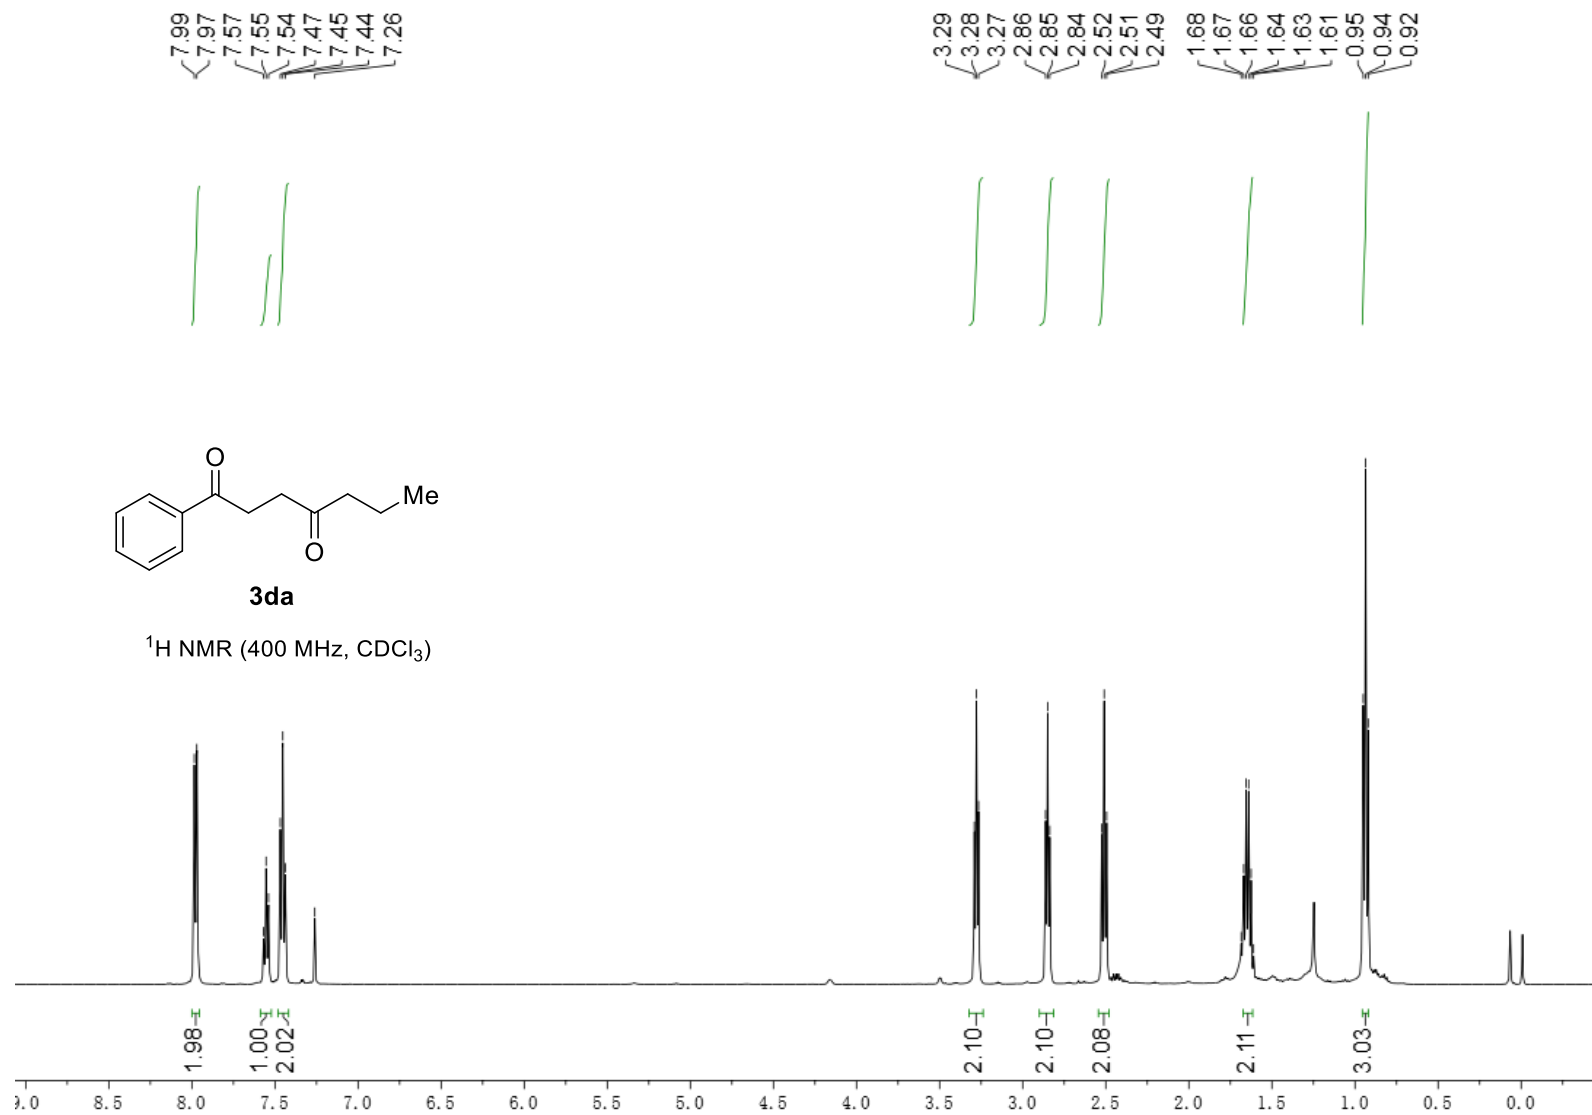

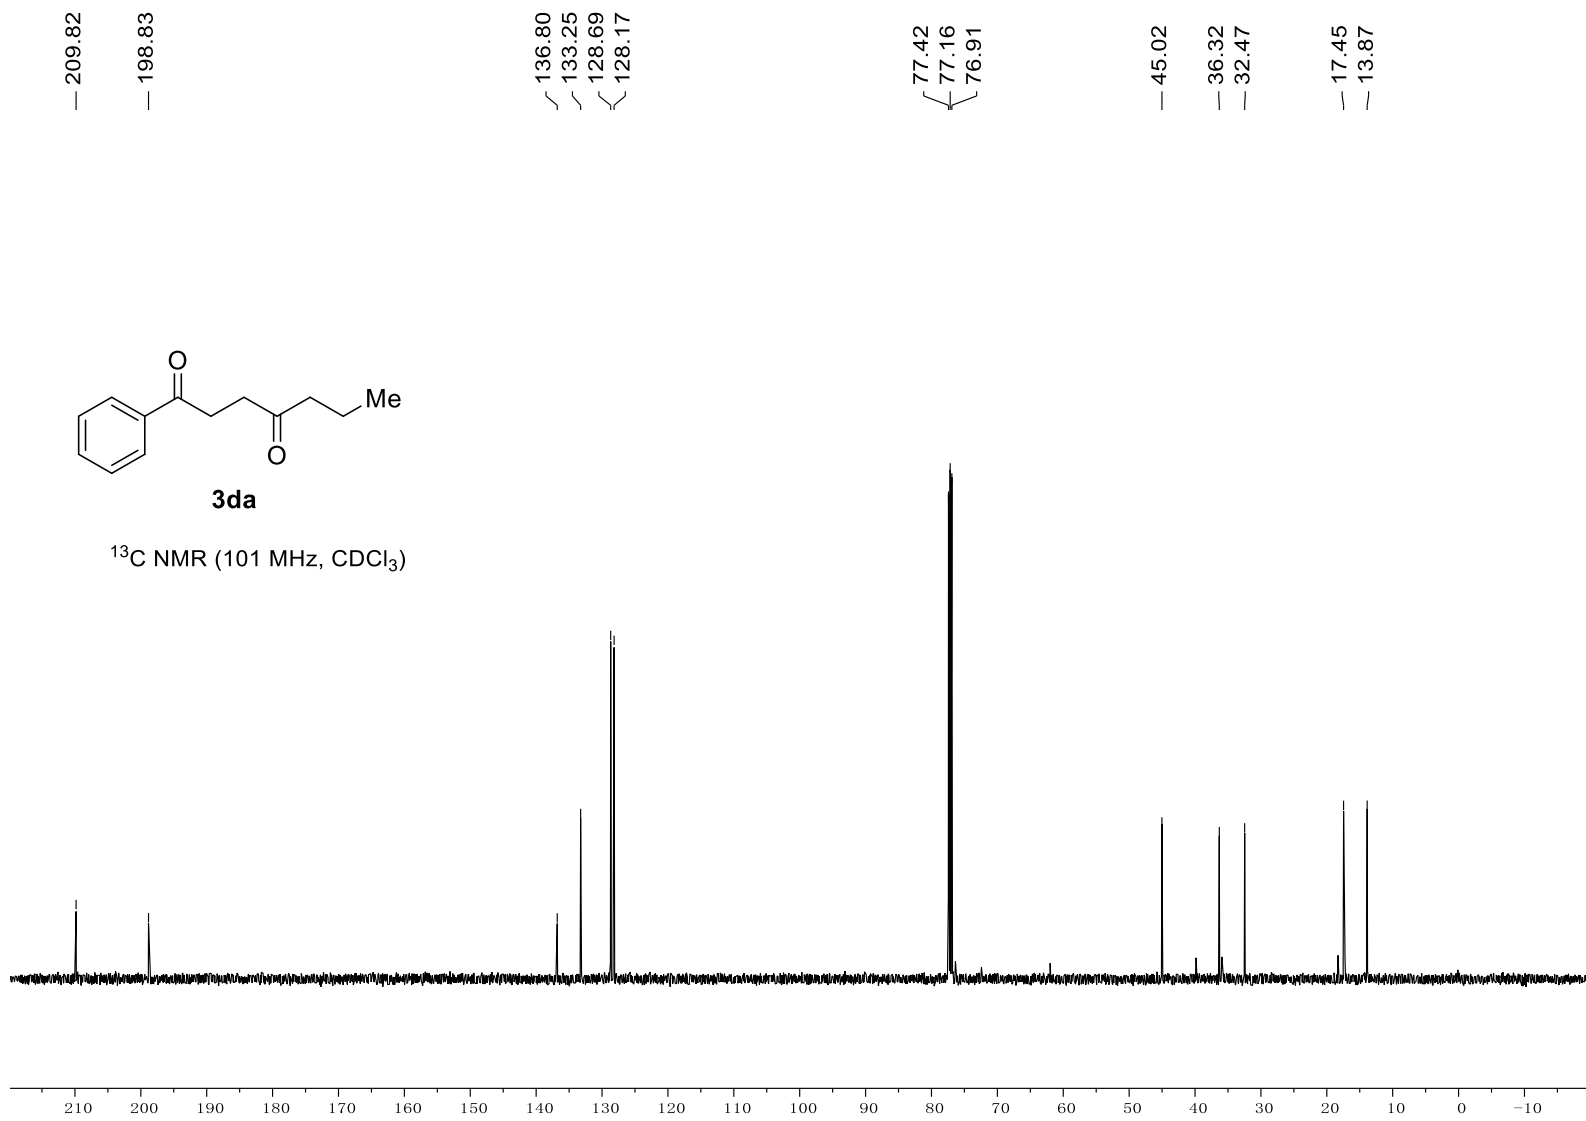

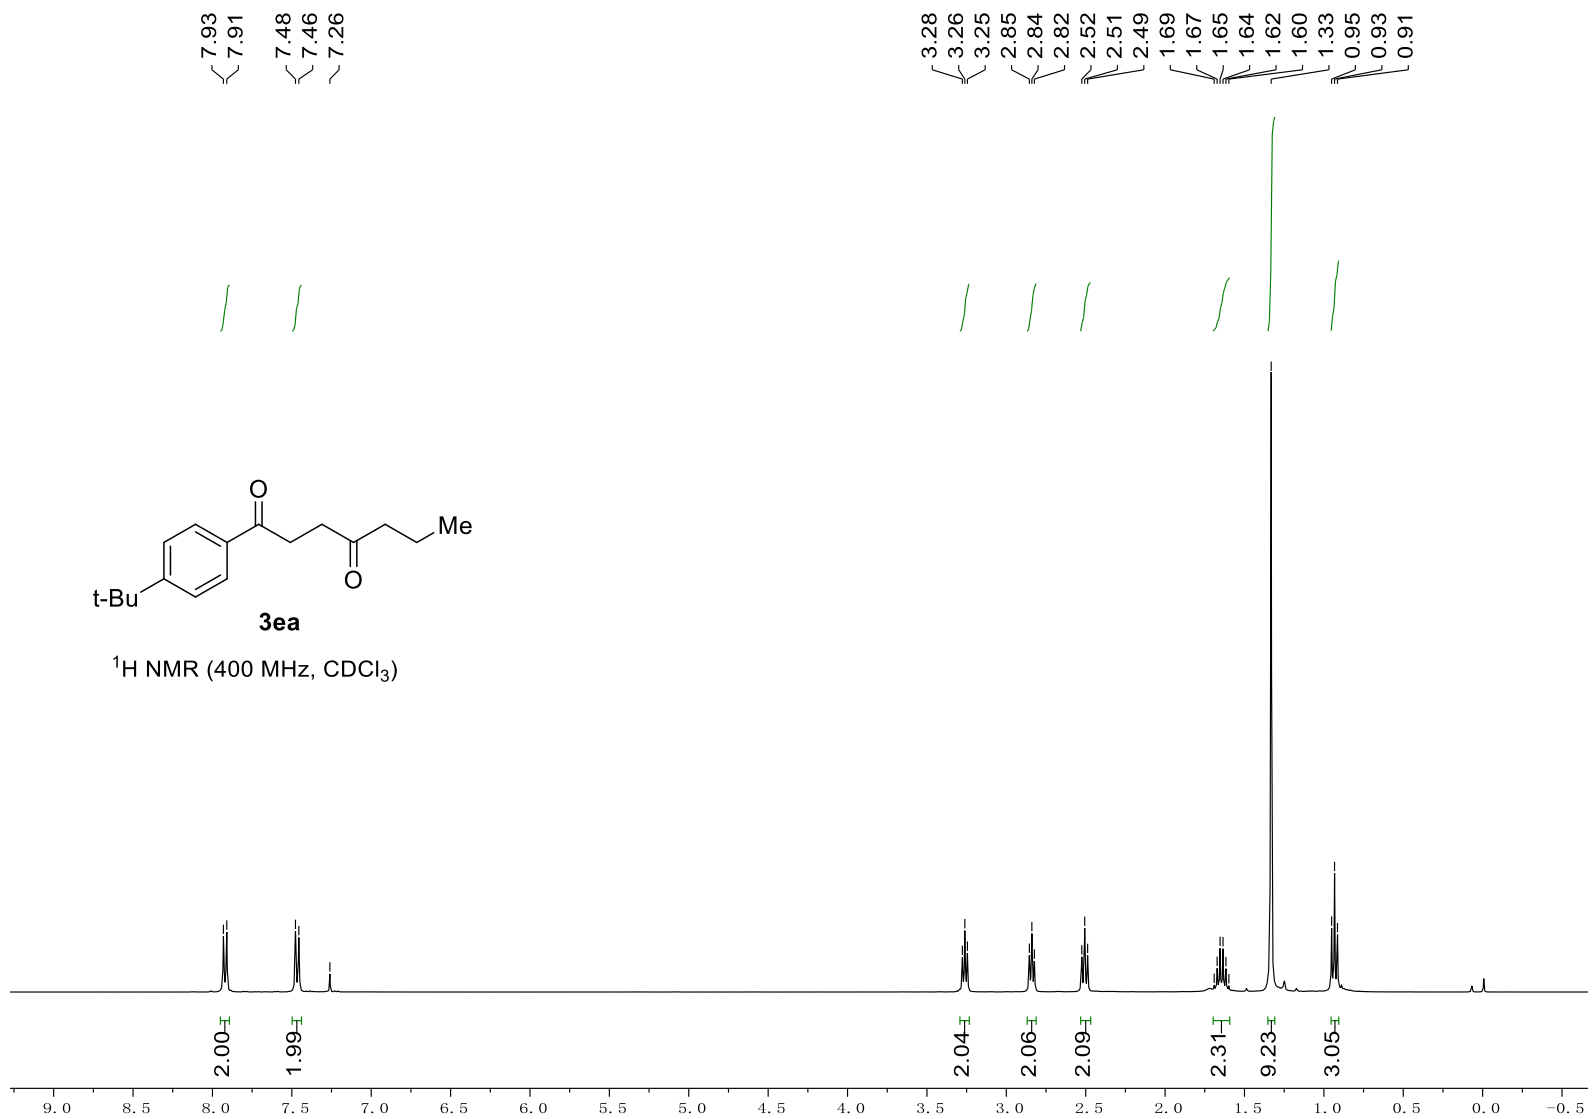

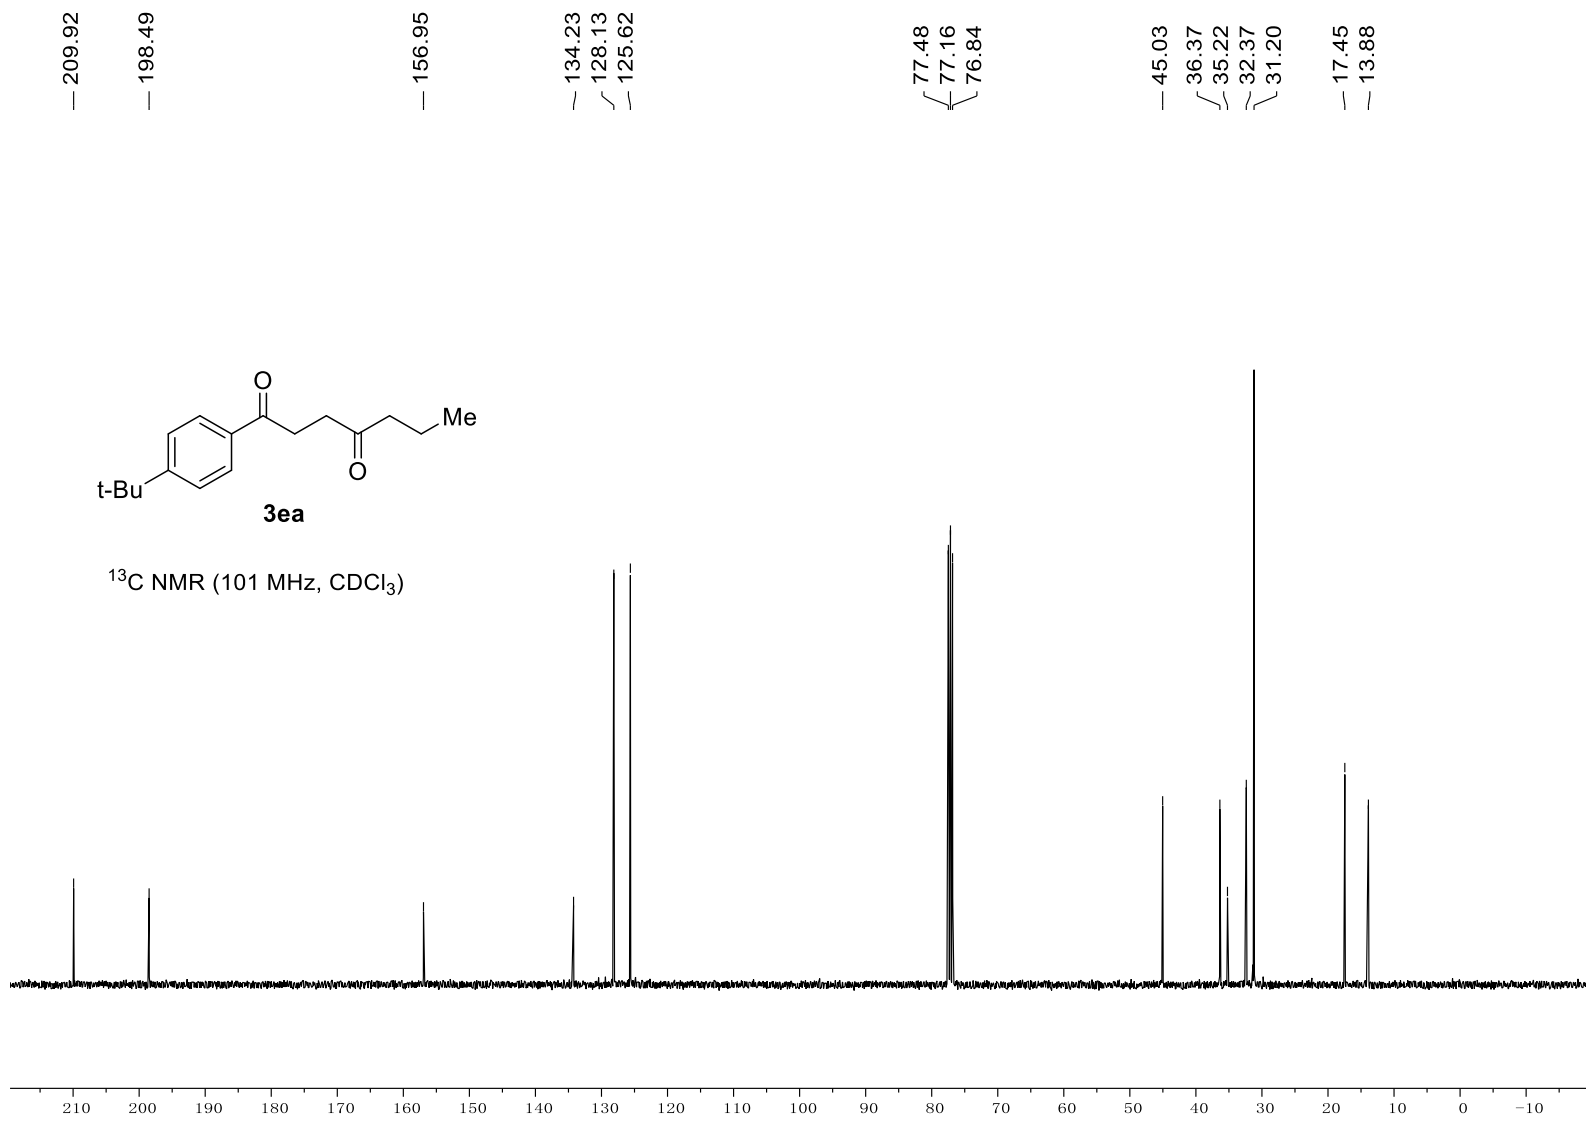

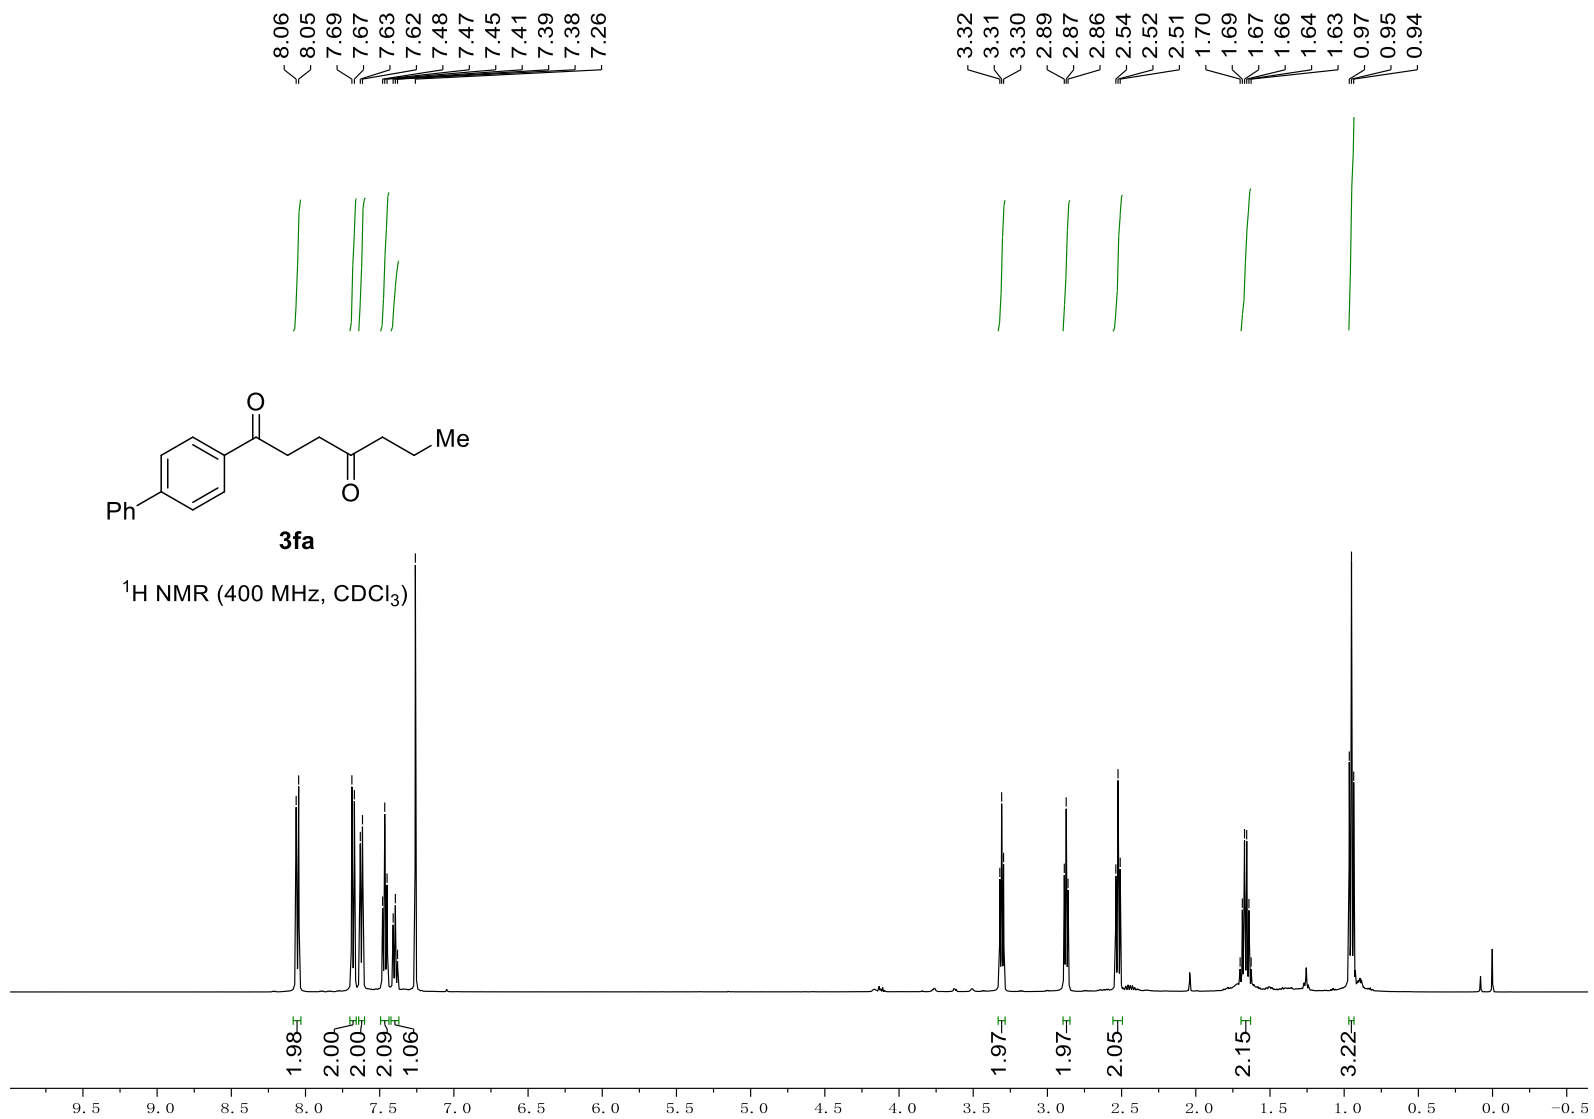

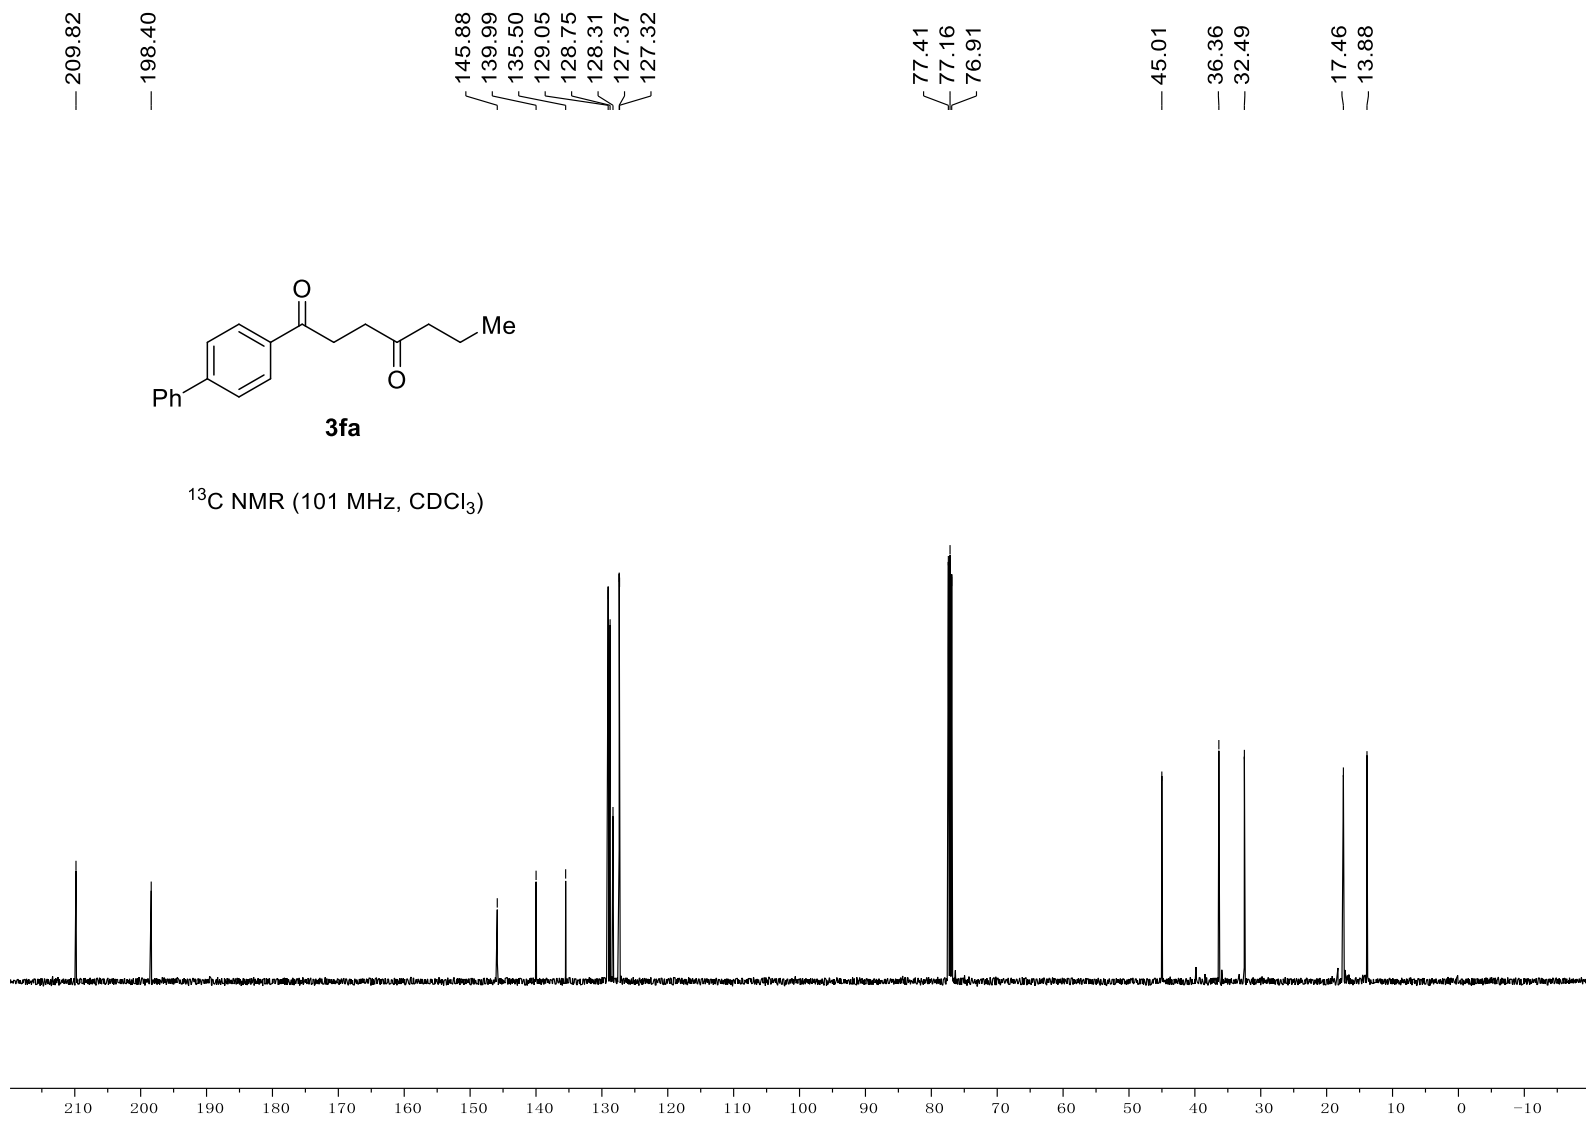



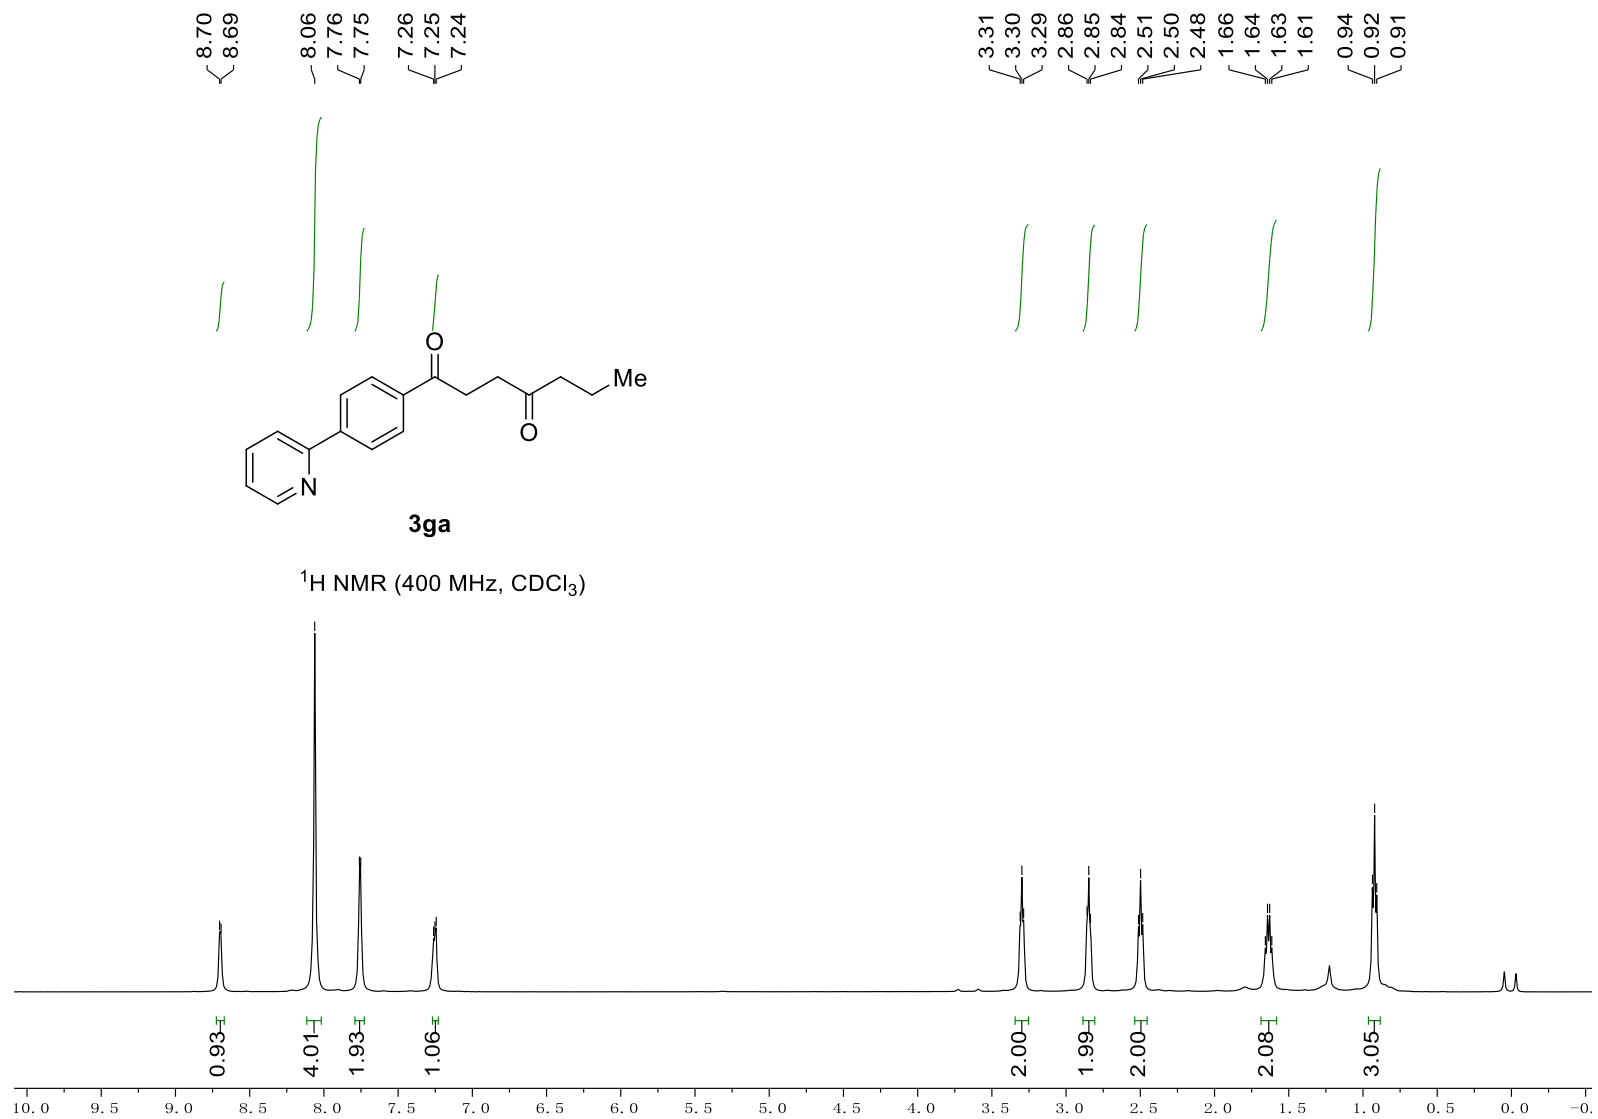

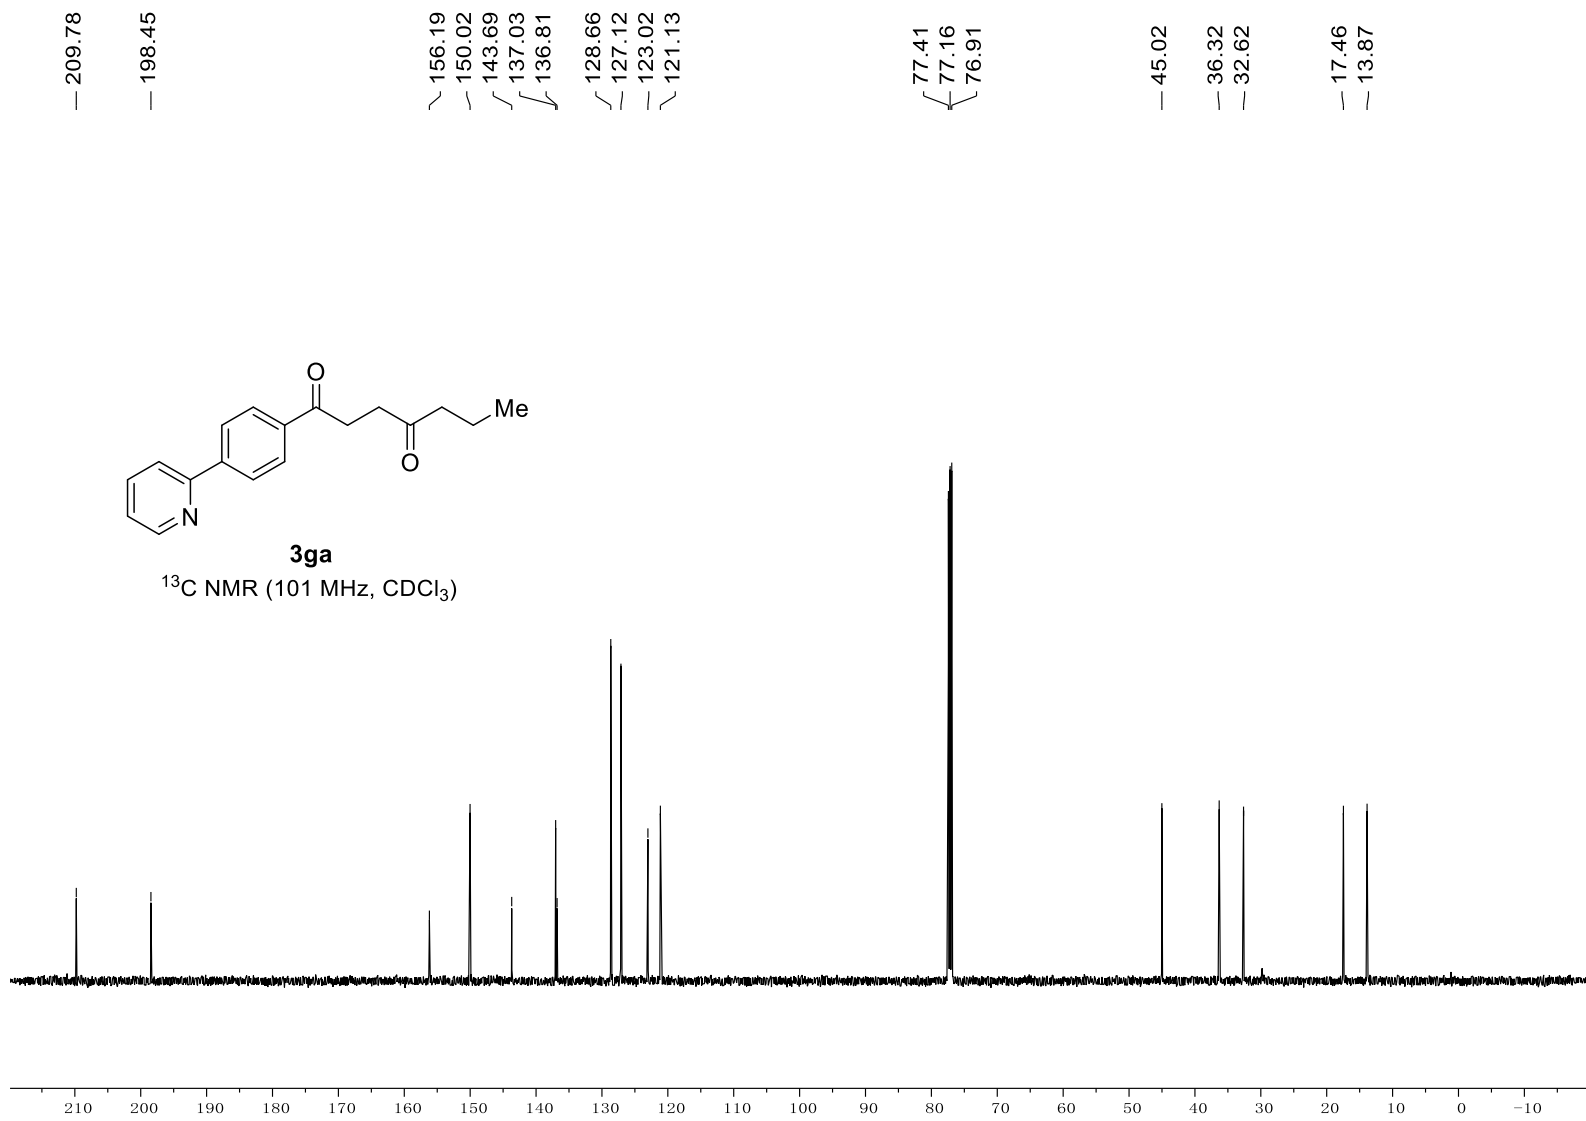

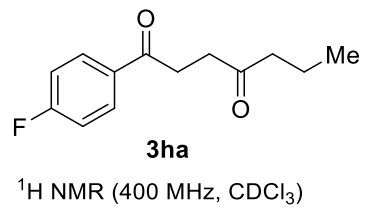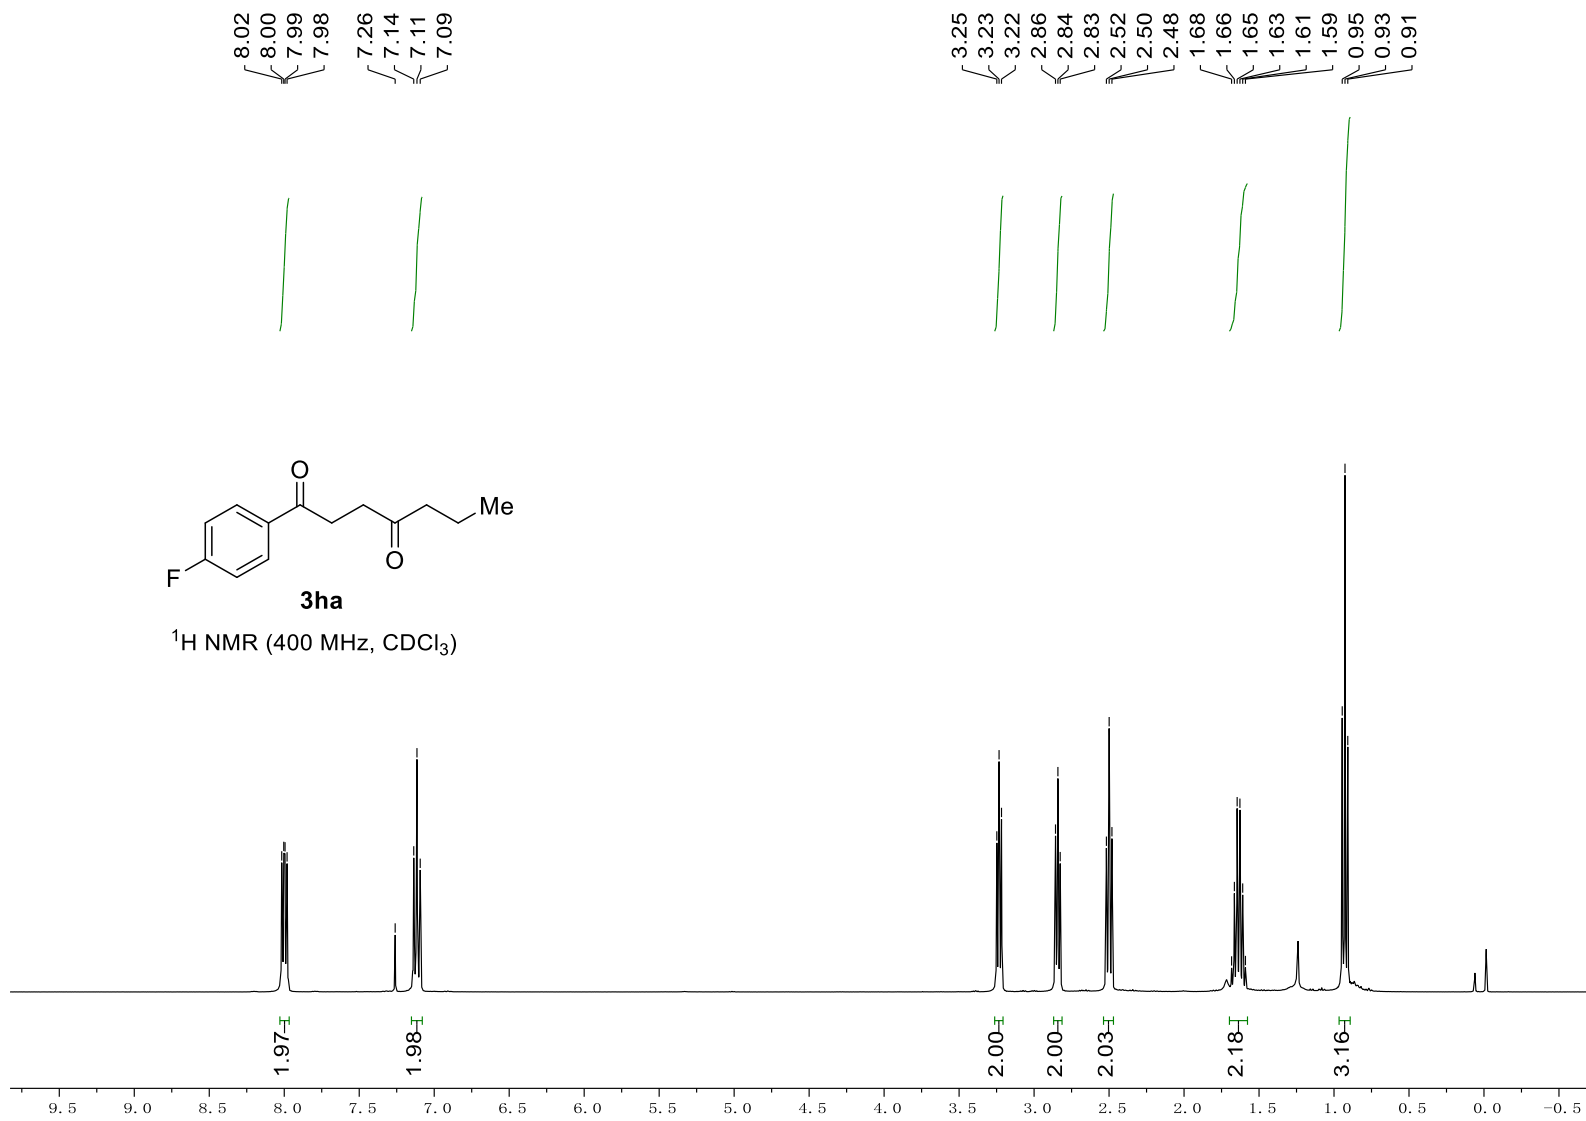

— 209.73

— 197.22

— 167.13

— 164.60

— 133.25

— 133.22

— 130.84

— 130.74

— 115.88

— 115.66

— 77.48

— 77.16

— 76.84

— 44.97

— 36.28

— 32.32

— 17.43

— 13.86

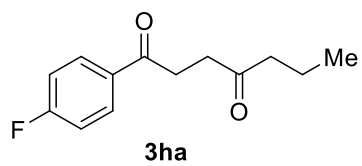

$^{13}\text{C}$  NMR (101 MHz,  $\text{CDCl}_3$ )

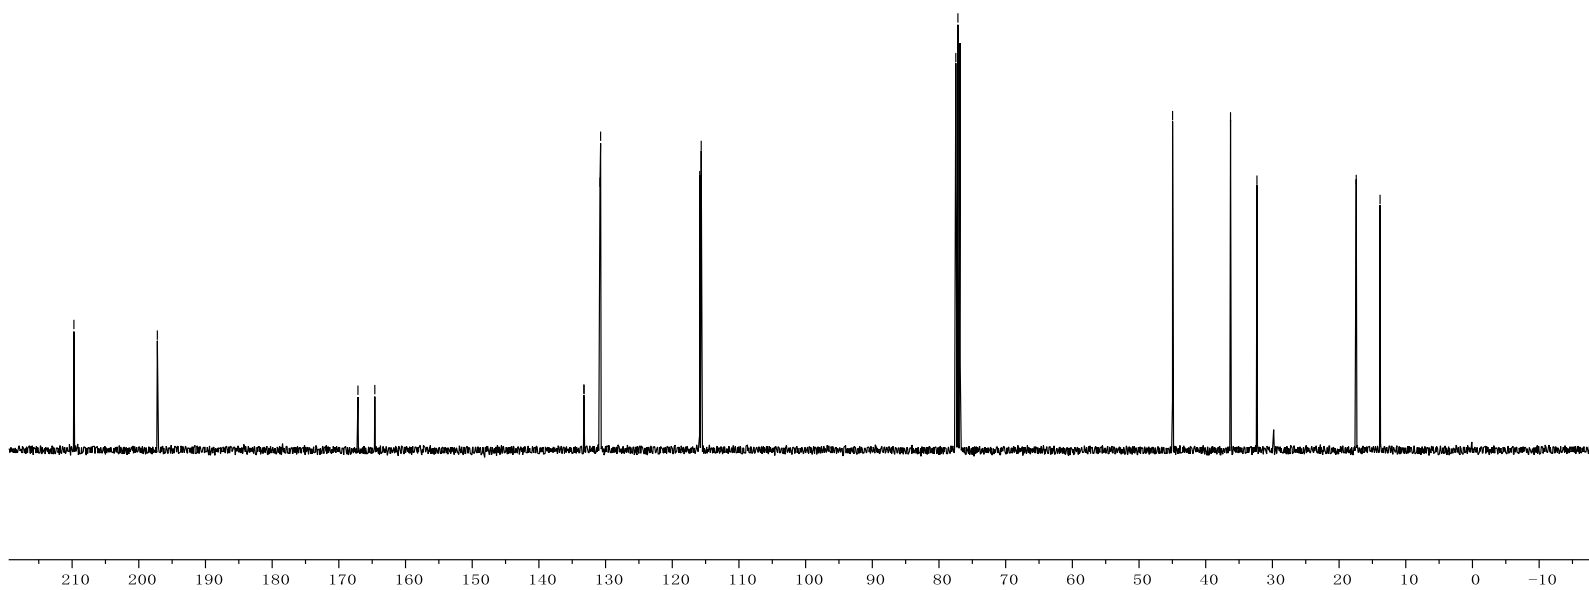

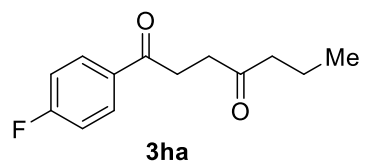

<sup>19</sup>F NMR (376 MHz, CDCl<sub>3</sub>)

— -105.26

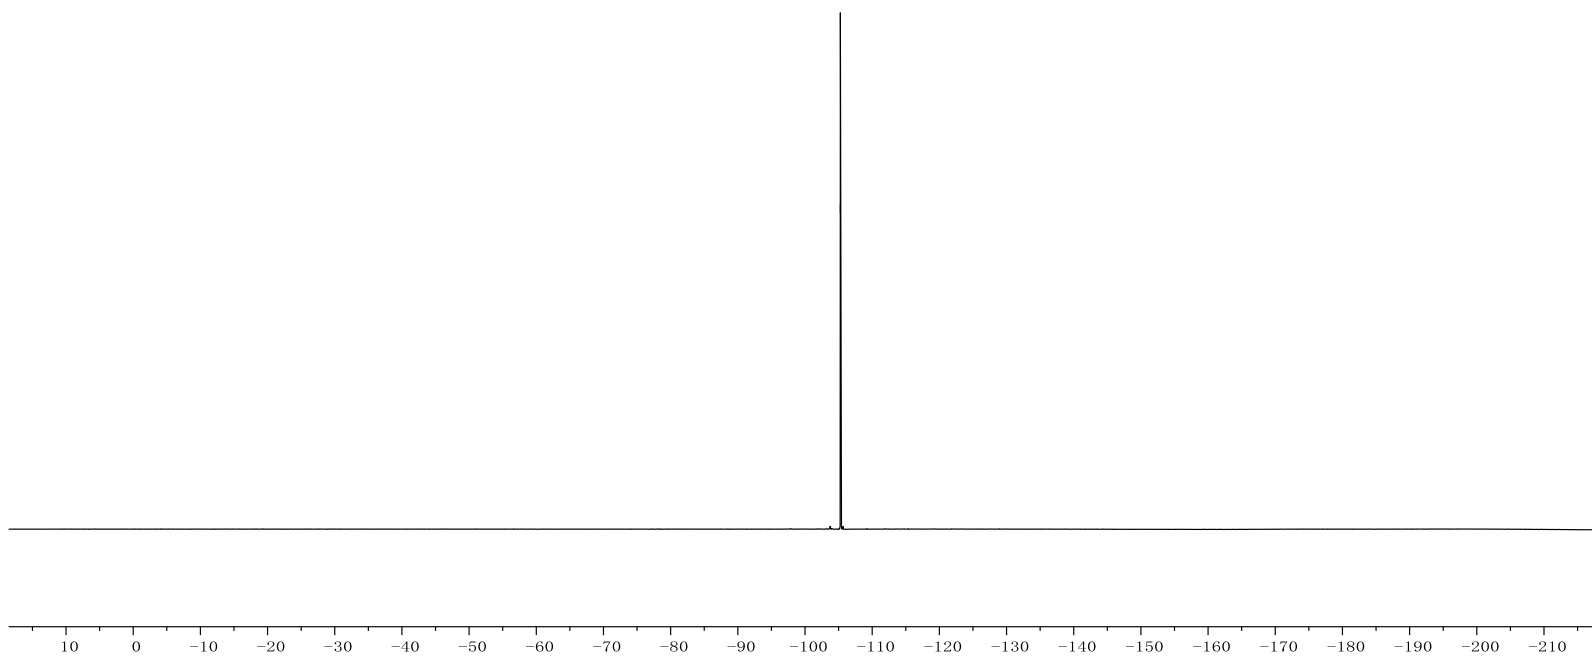

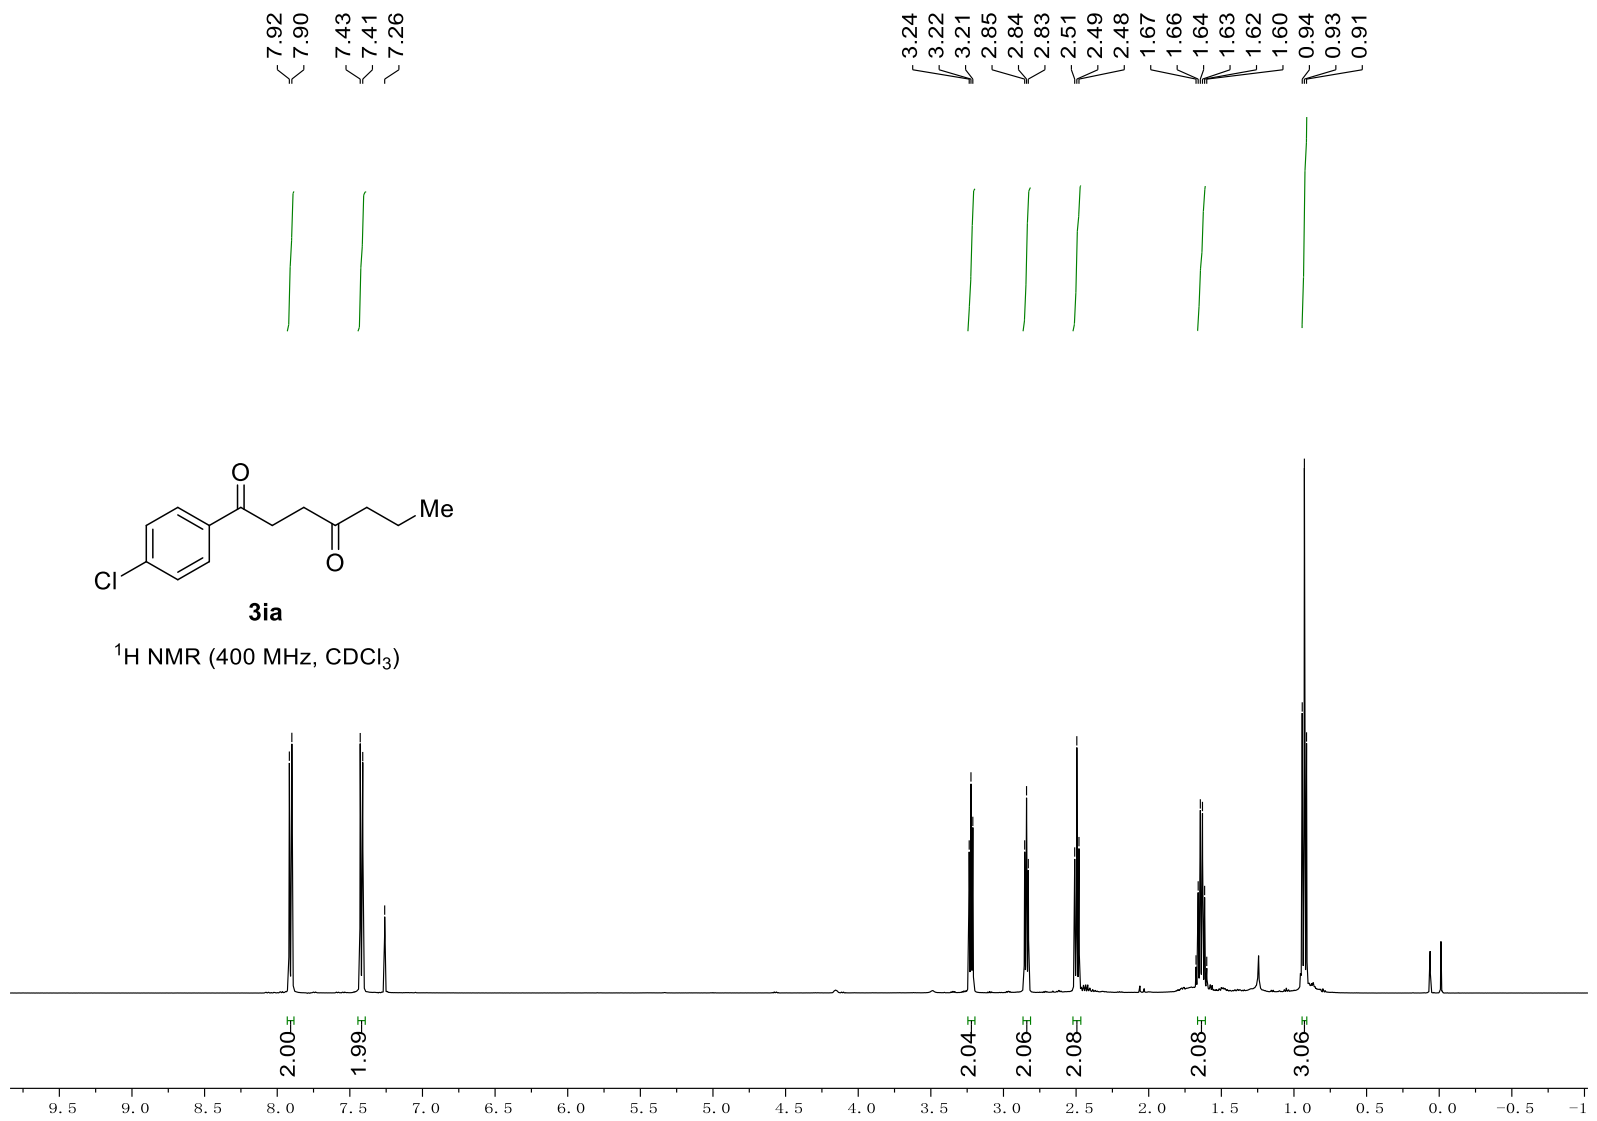

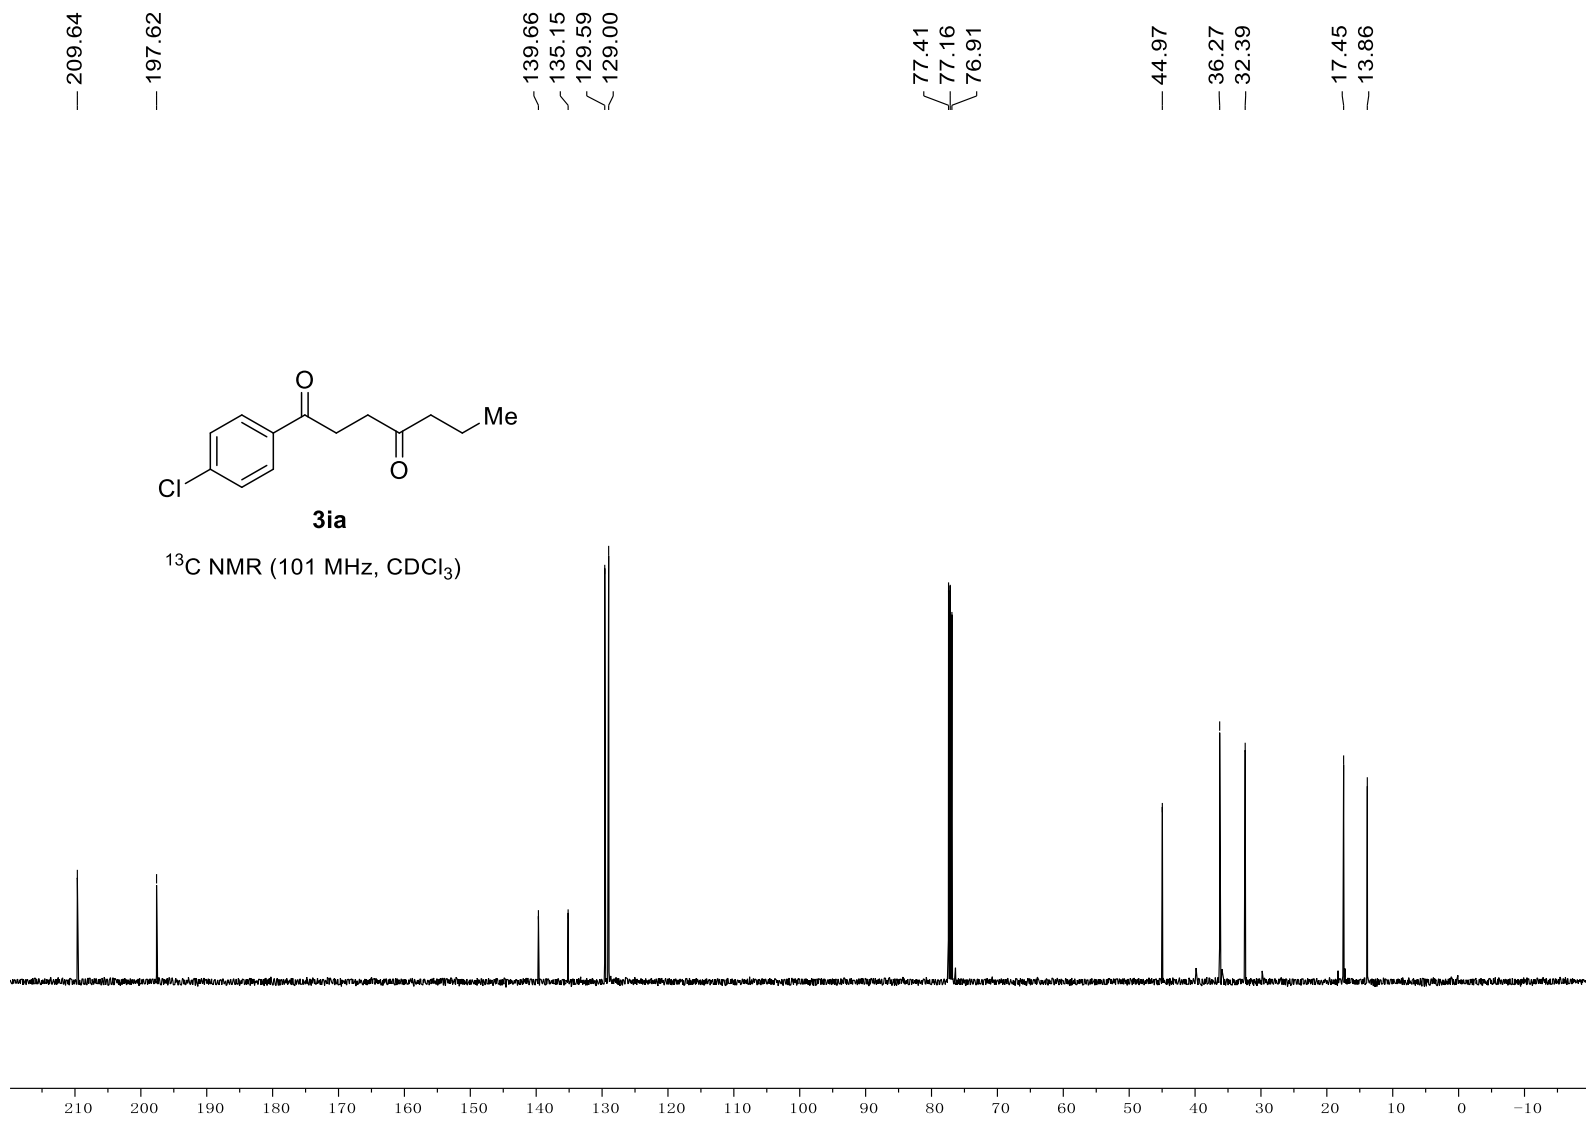

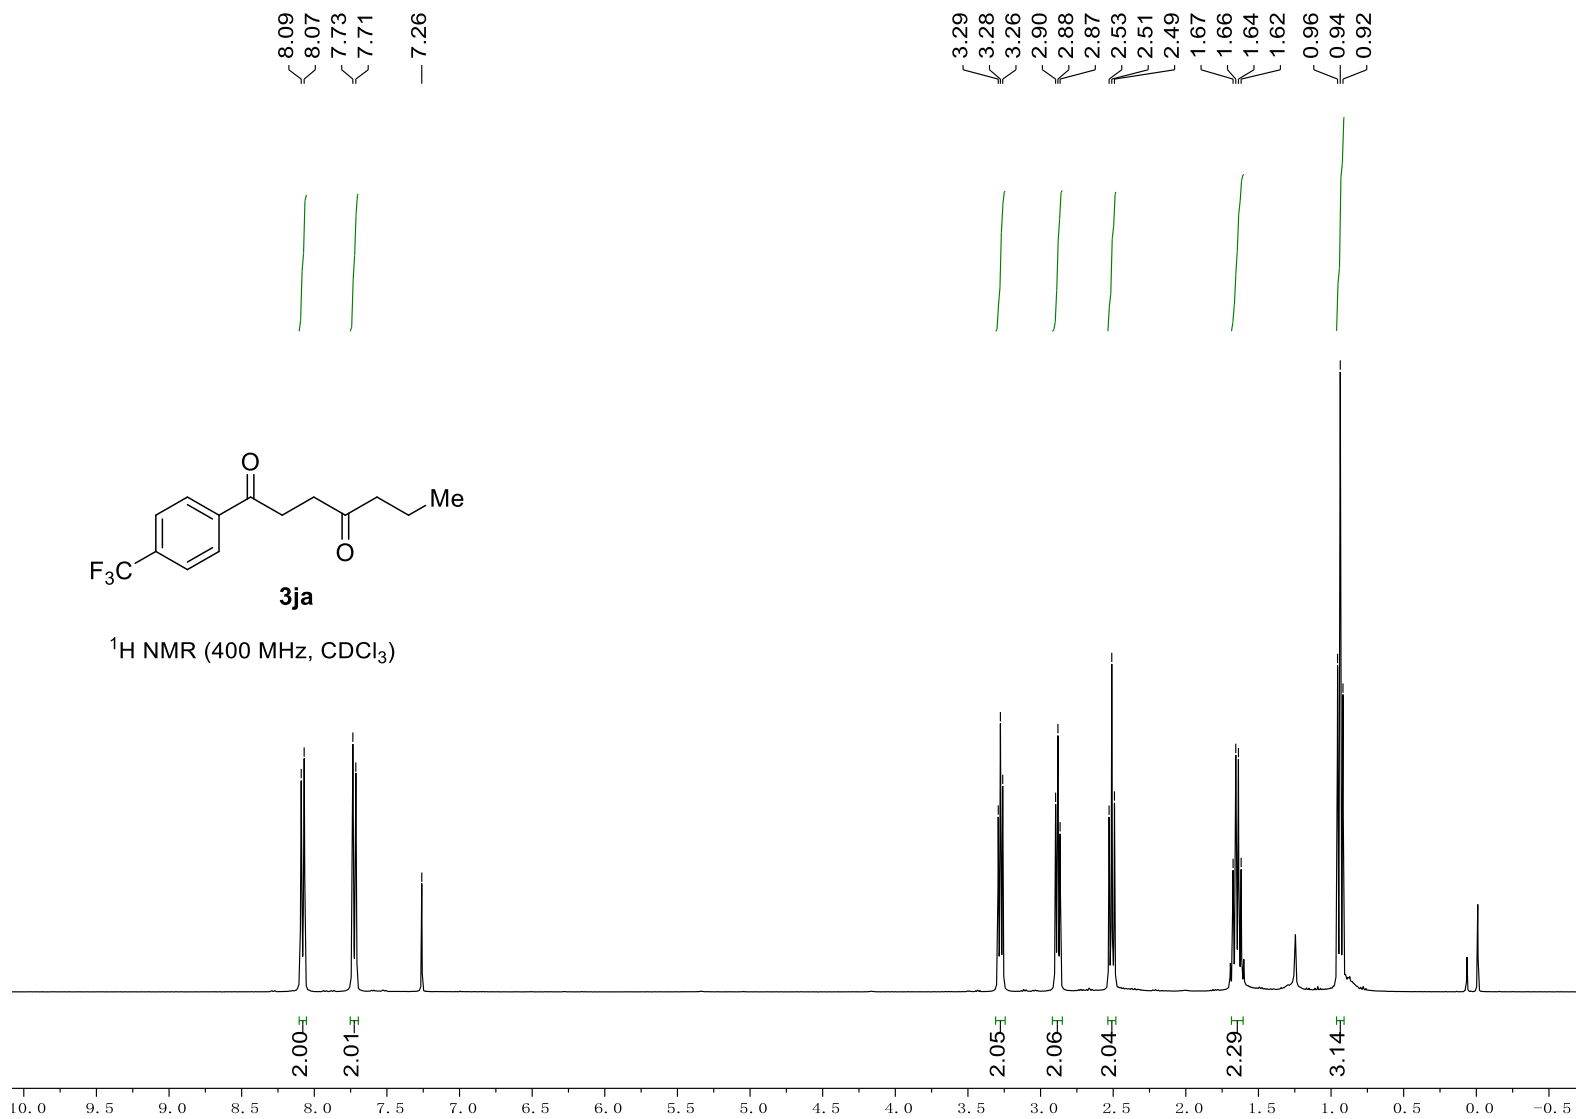



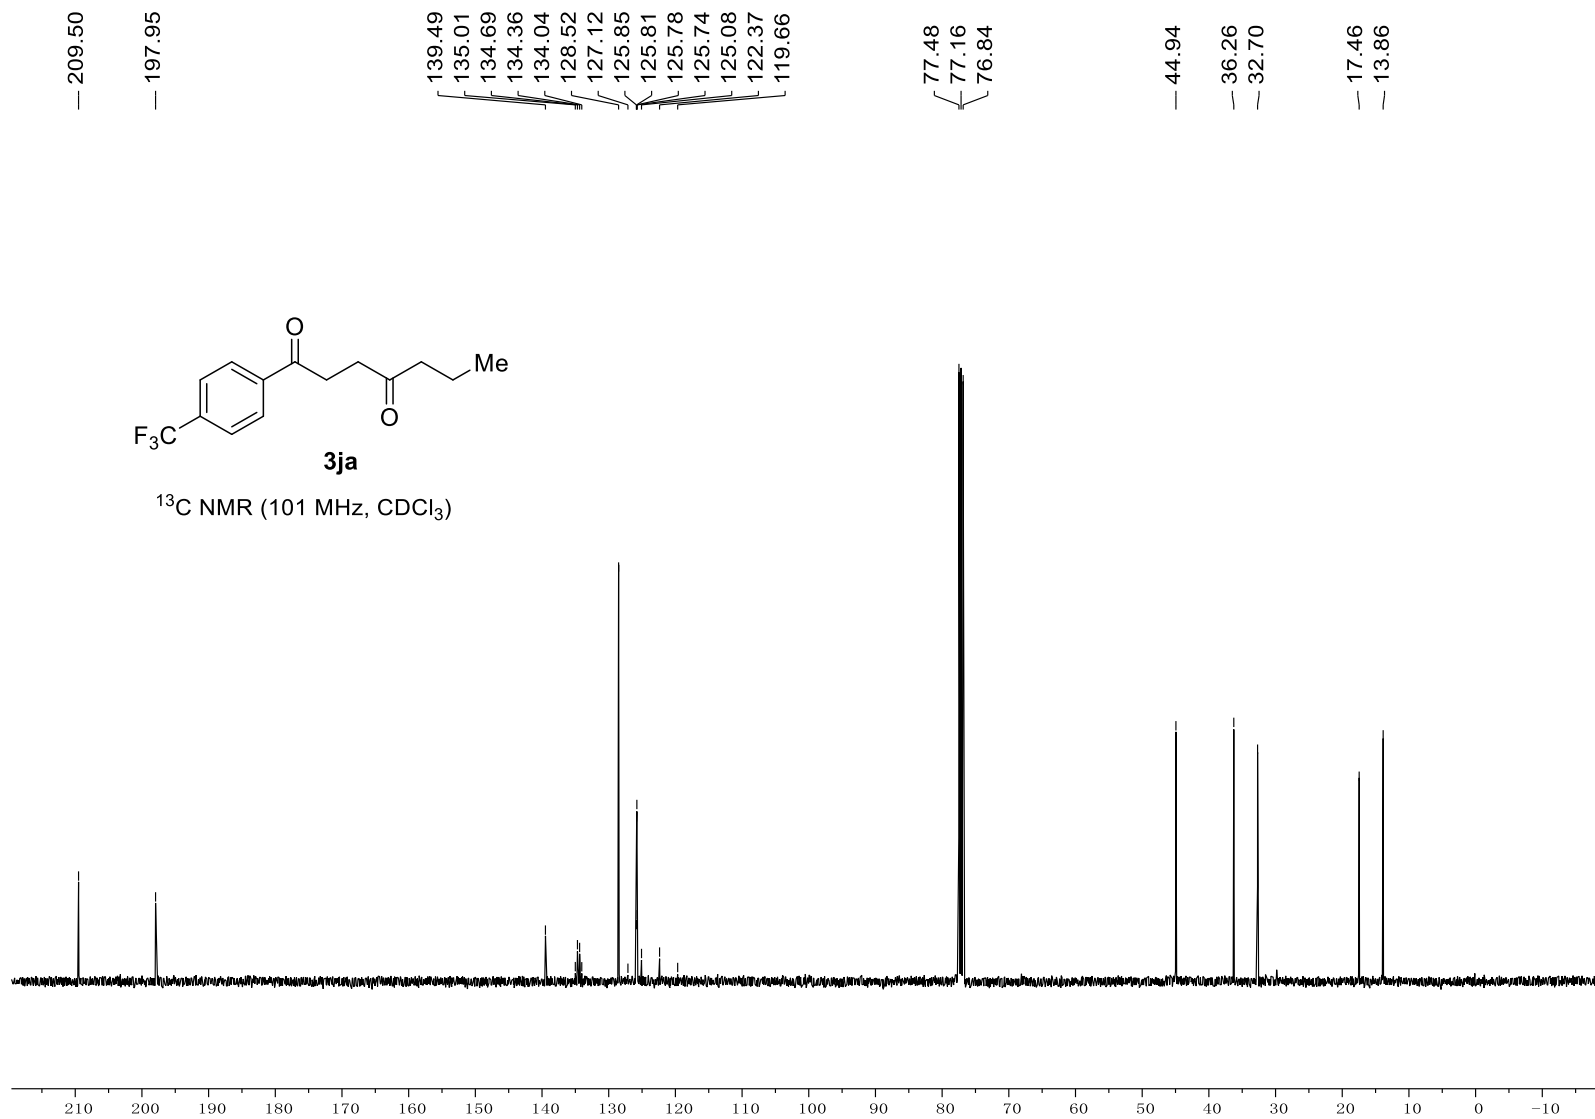

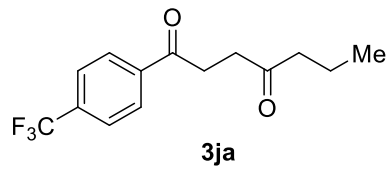

<sup>19</sup>F NMR (376 MHz, CDCl<sub>3</sub>)

--63.11

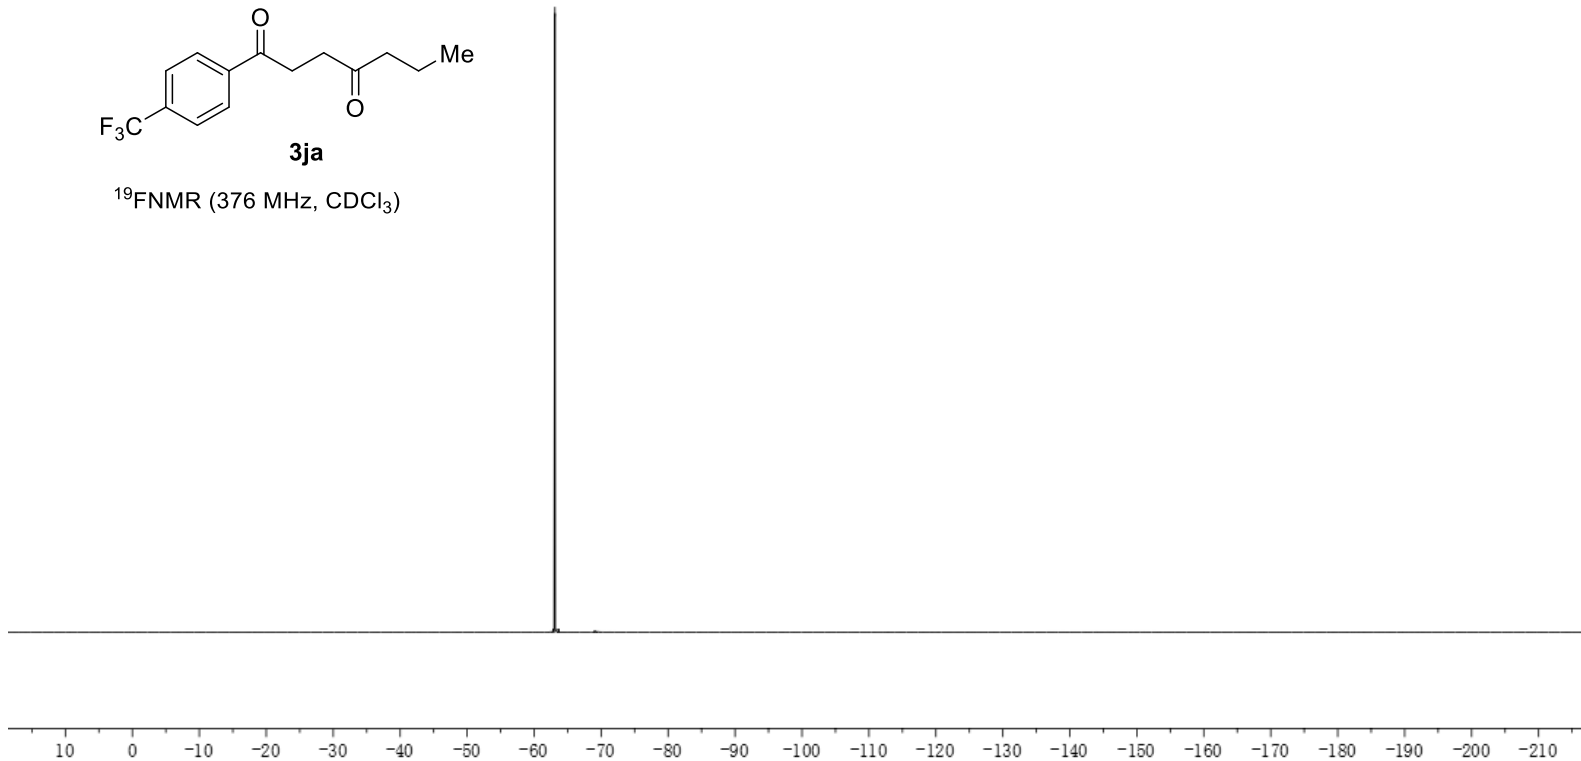

8.15  
8.14  
8.05  
8.03

7.26

3.28  
3.27  
3.26  
3.07  
2.91  
2.90  
2.88  
2.52  
2.50  
2.49  
1.68  
1.67  
1.66  
1.65  
1.63  
1.62  
1.60  
0.95  
0.93  
0.92

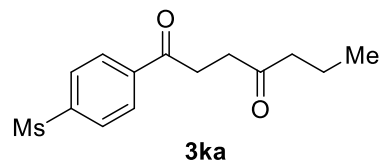

<sup>1</sup>H NMR (400 MHz, CDCl<sub>3</sub>)

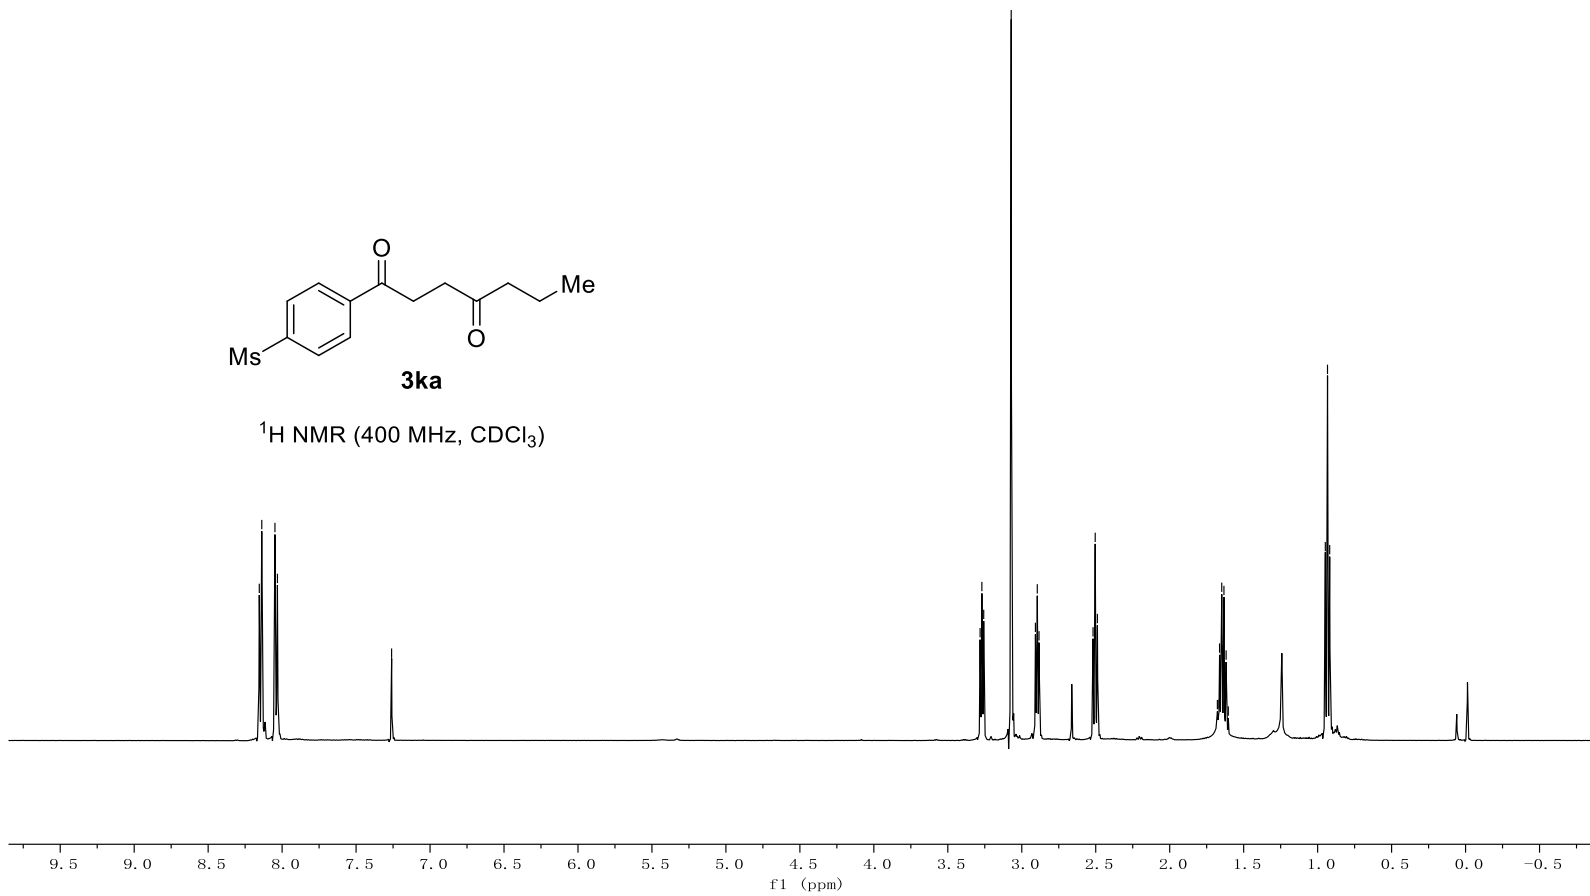

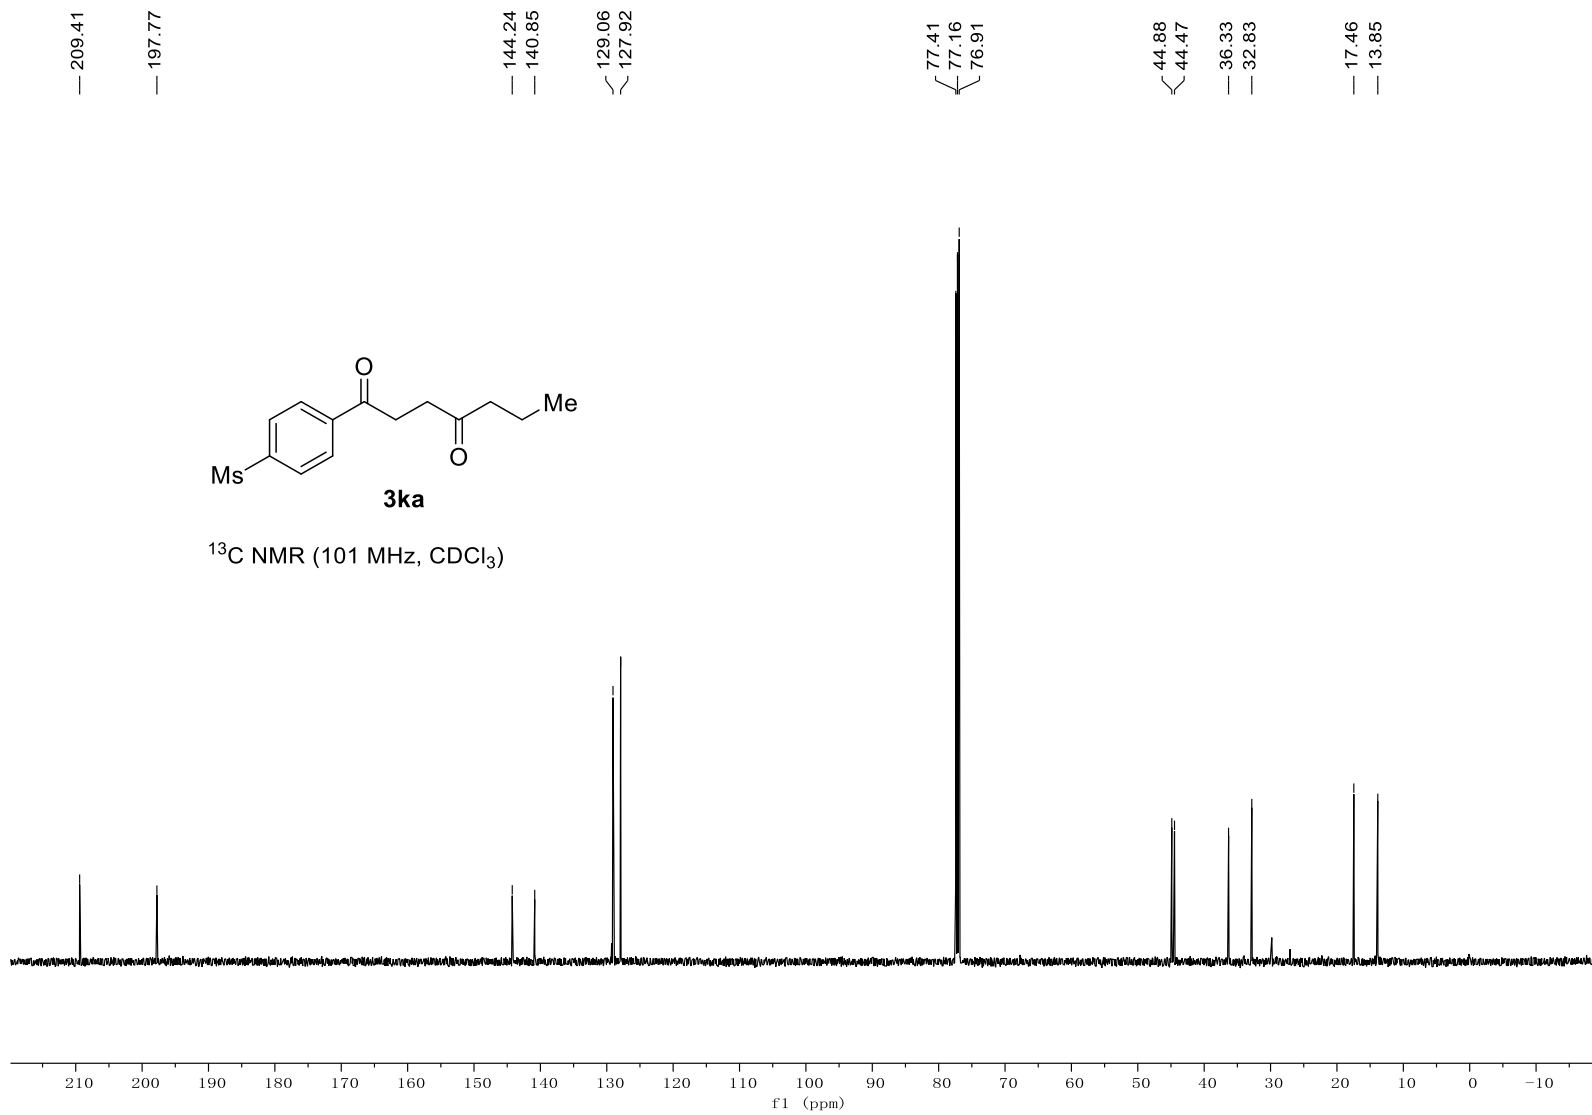

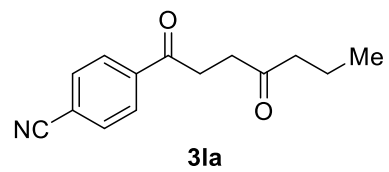

<sup>1</sup>H NMR (400 MHz, CDCl<sub>3</sub>)

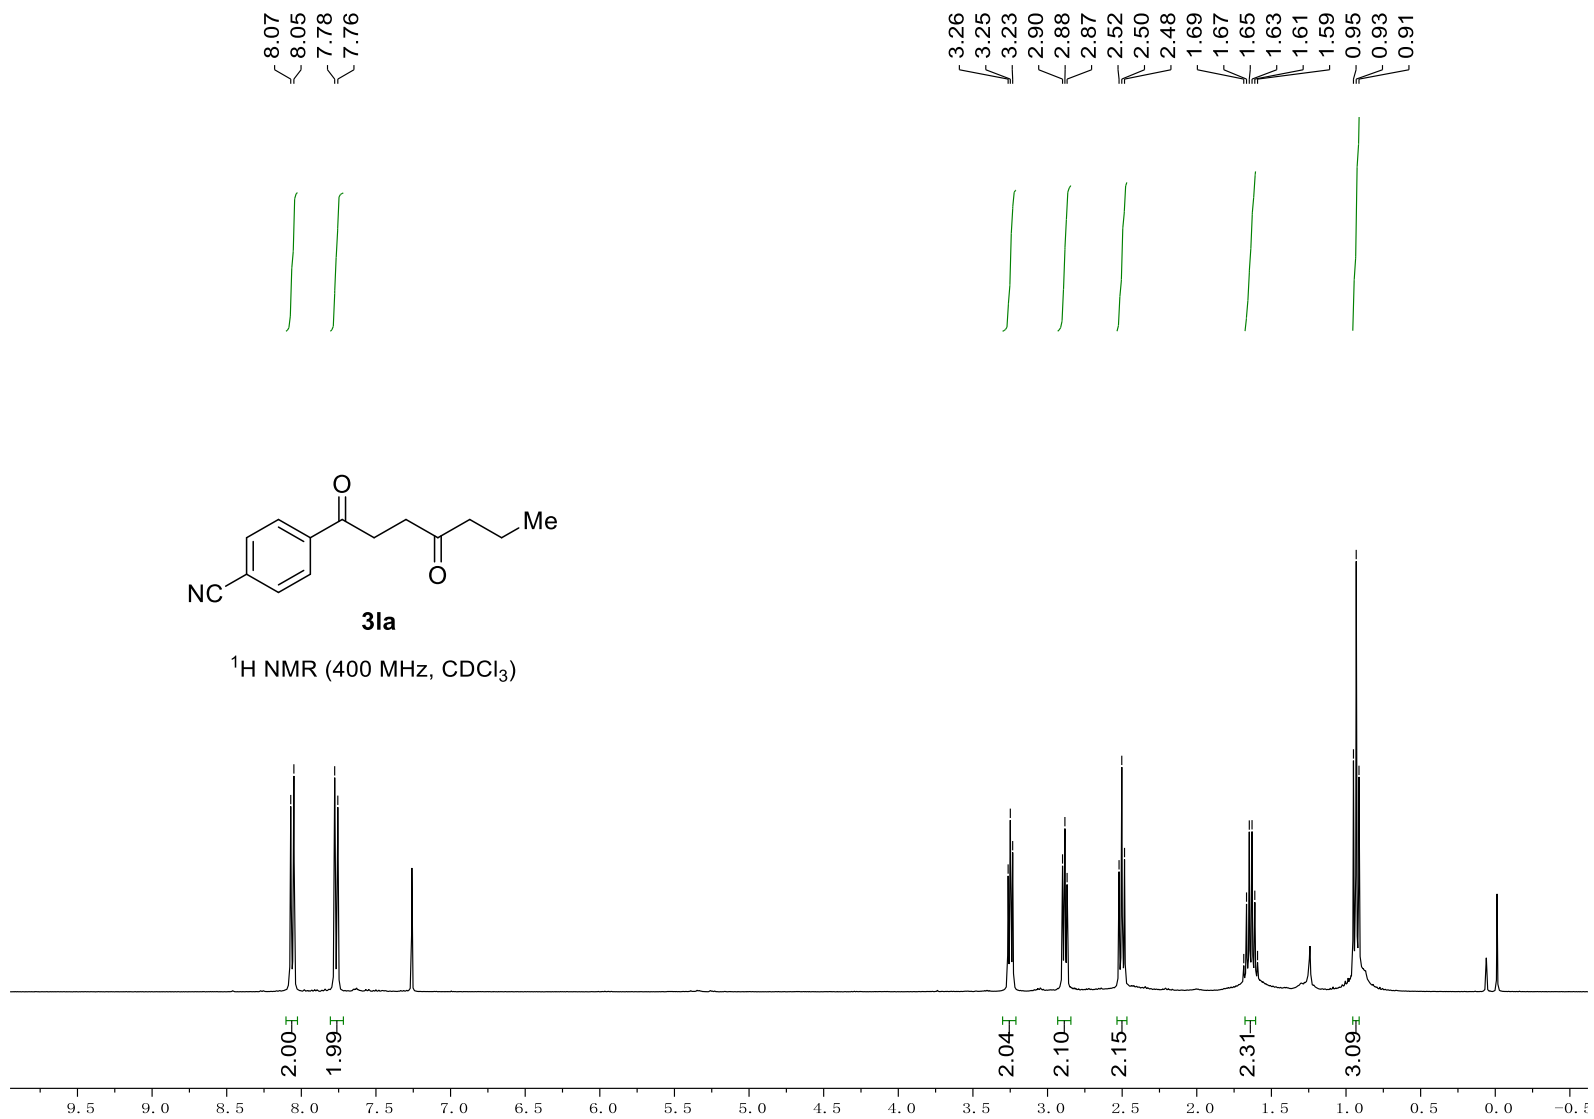

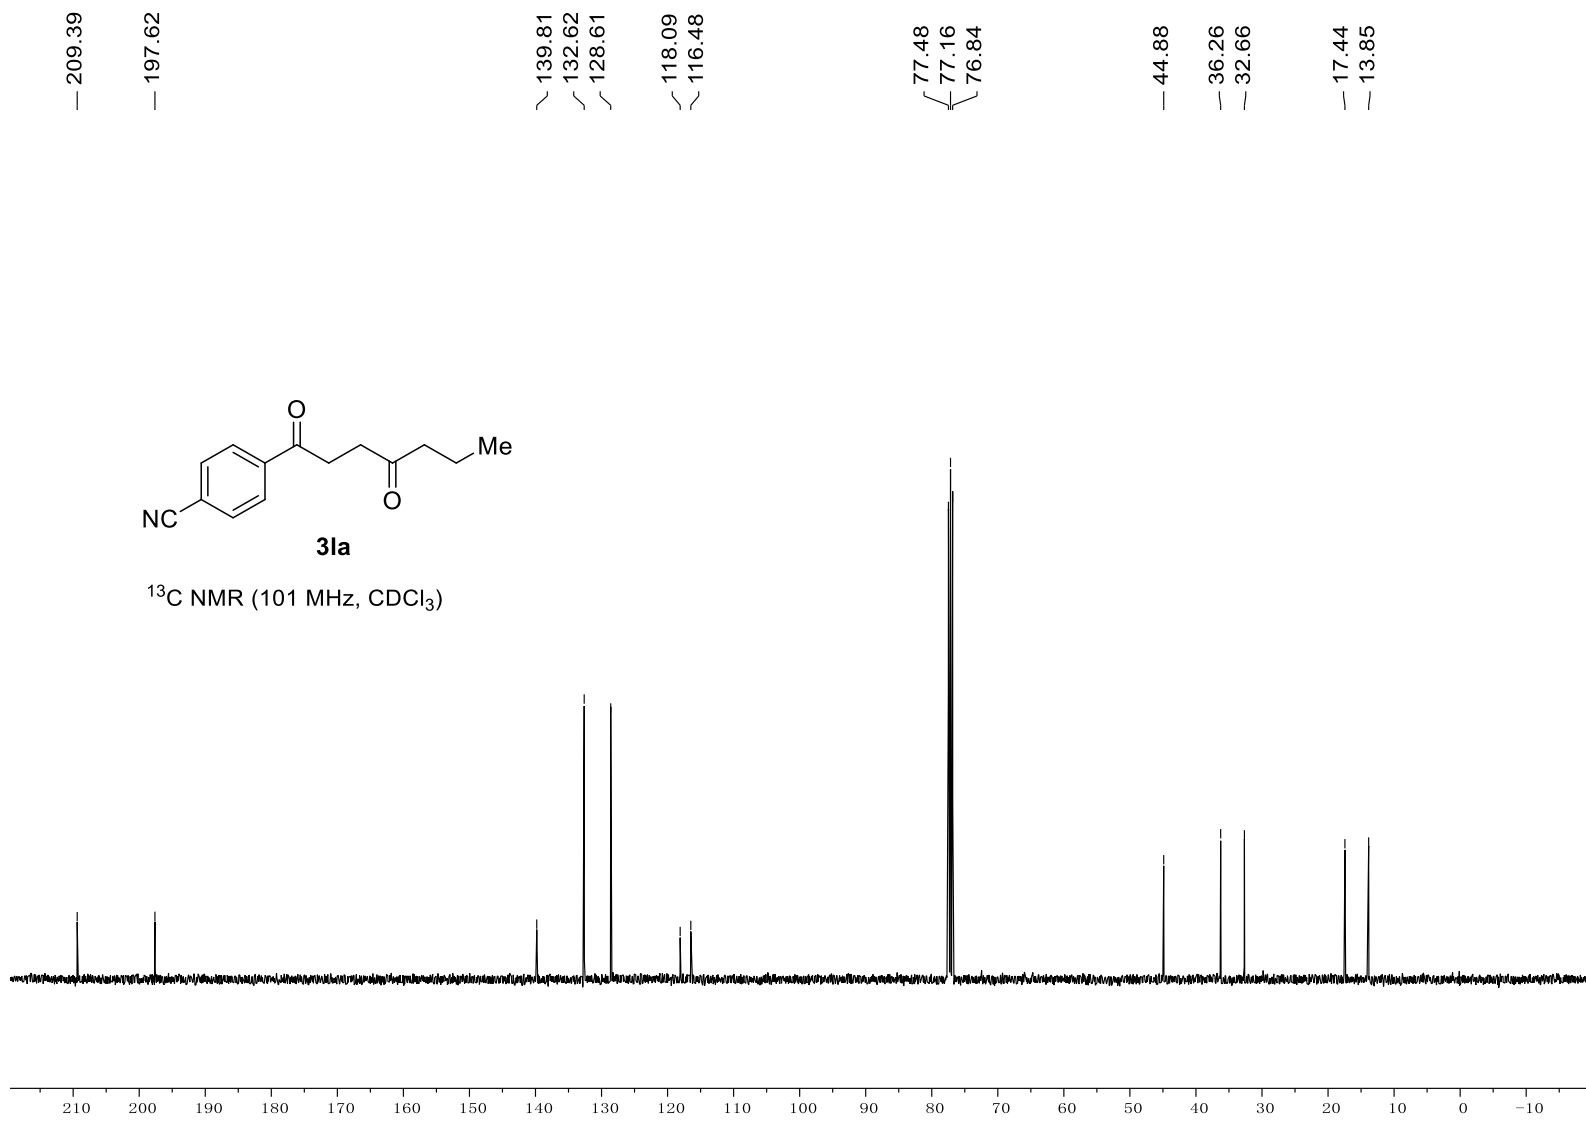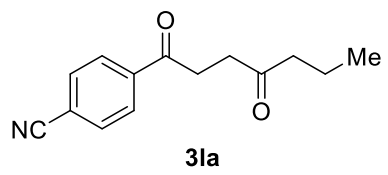

<sup>13</sup>C NMR (101 MHz, CDCl<sub>3</sub>)

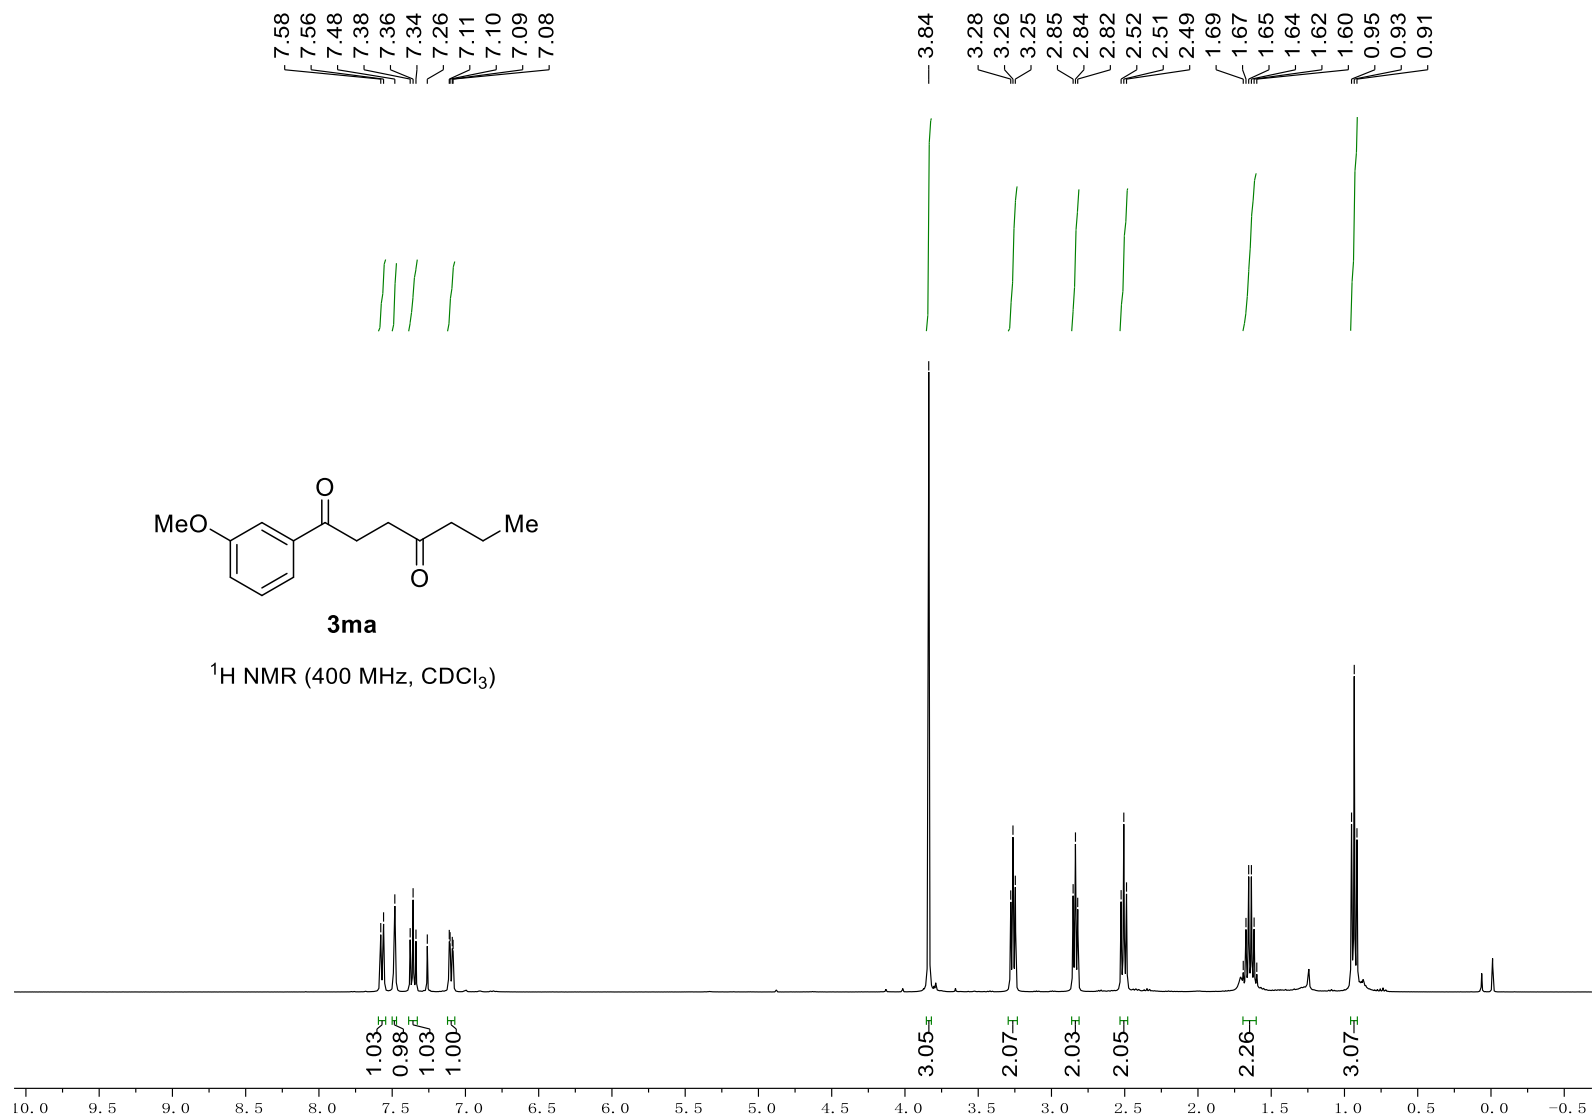

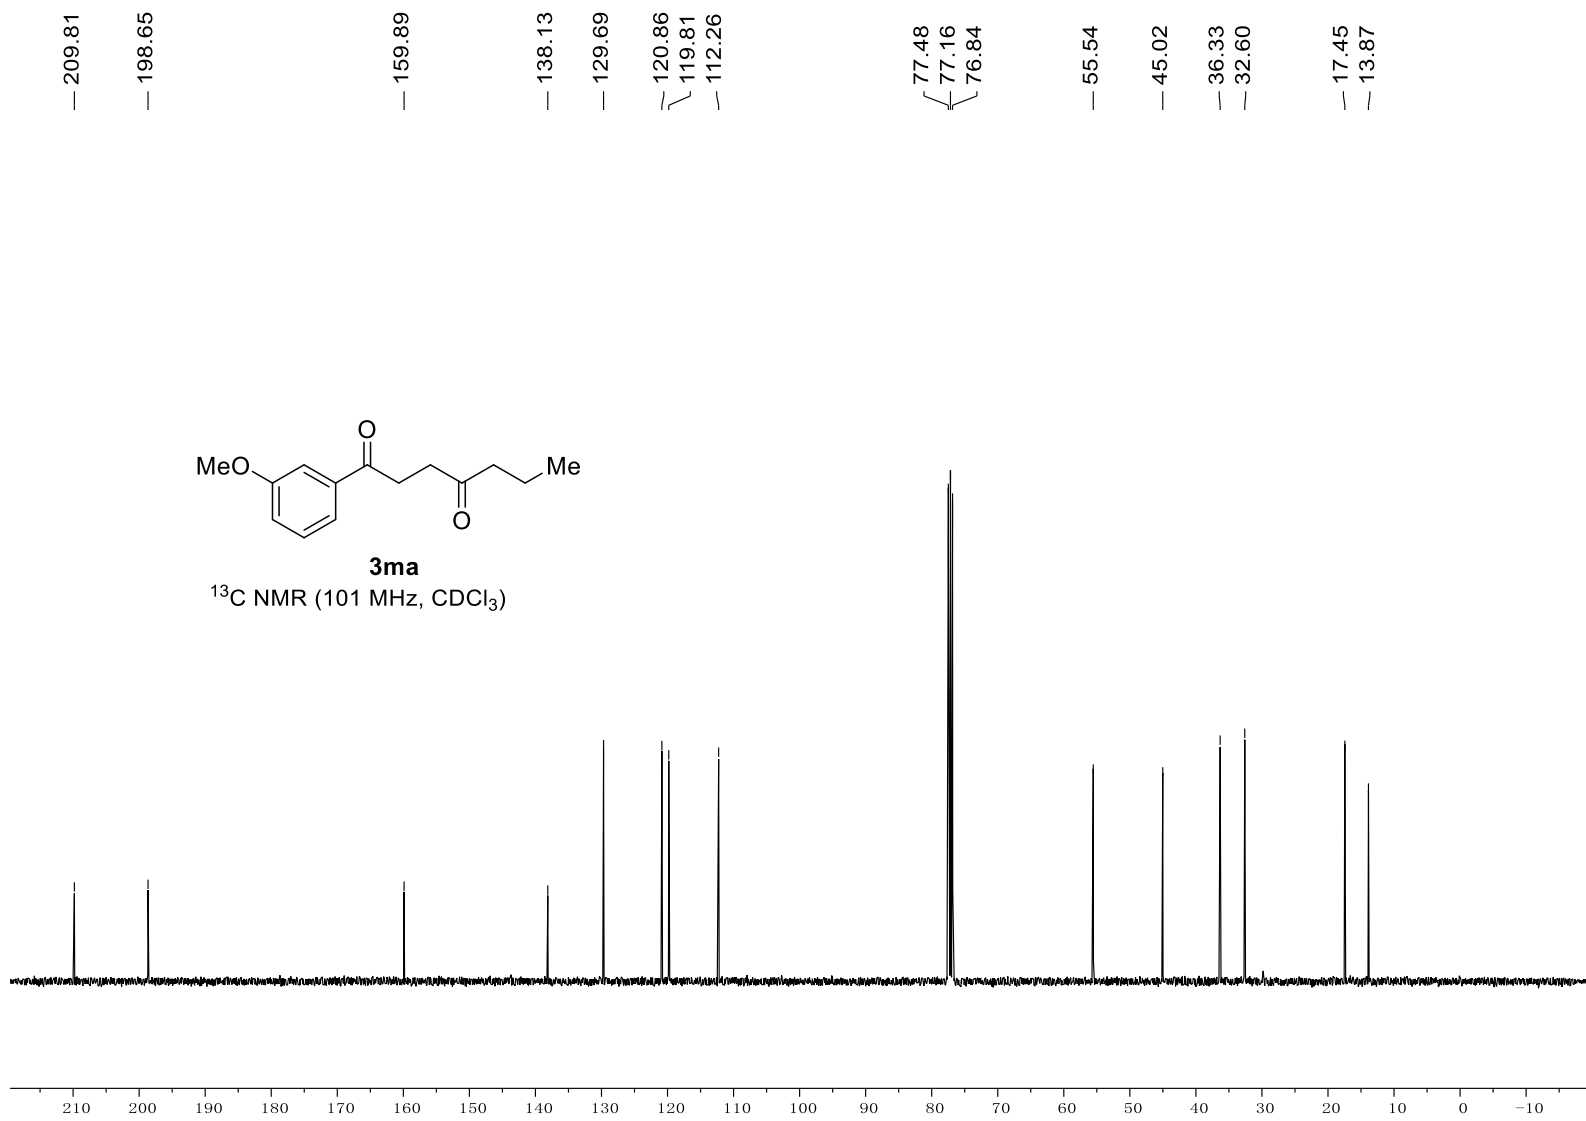



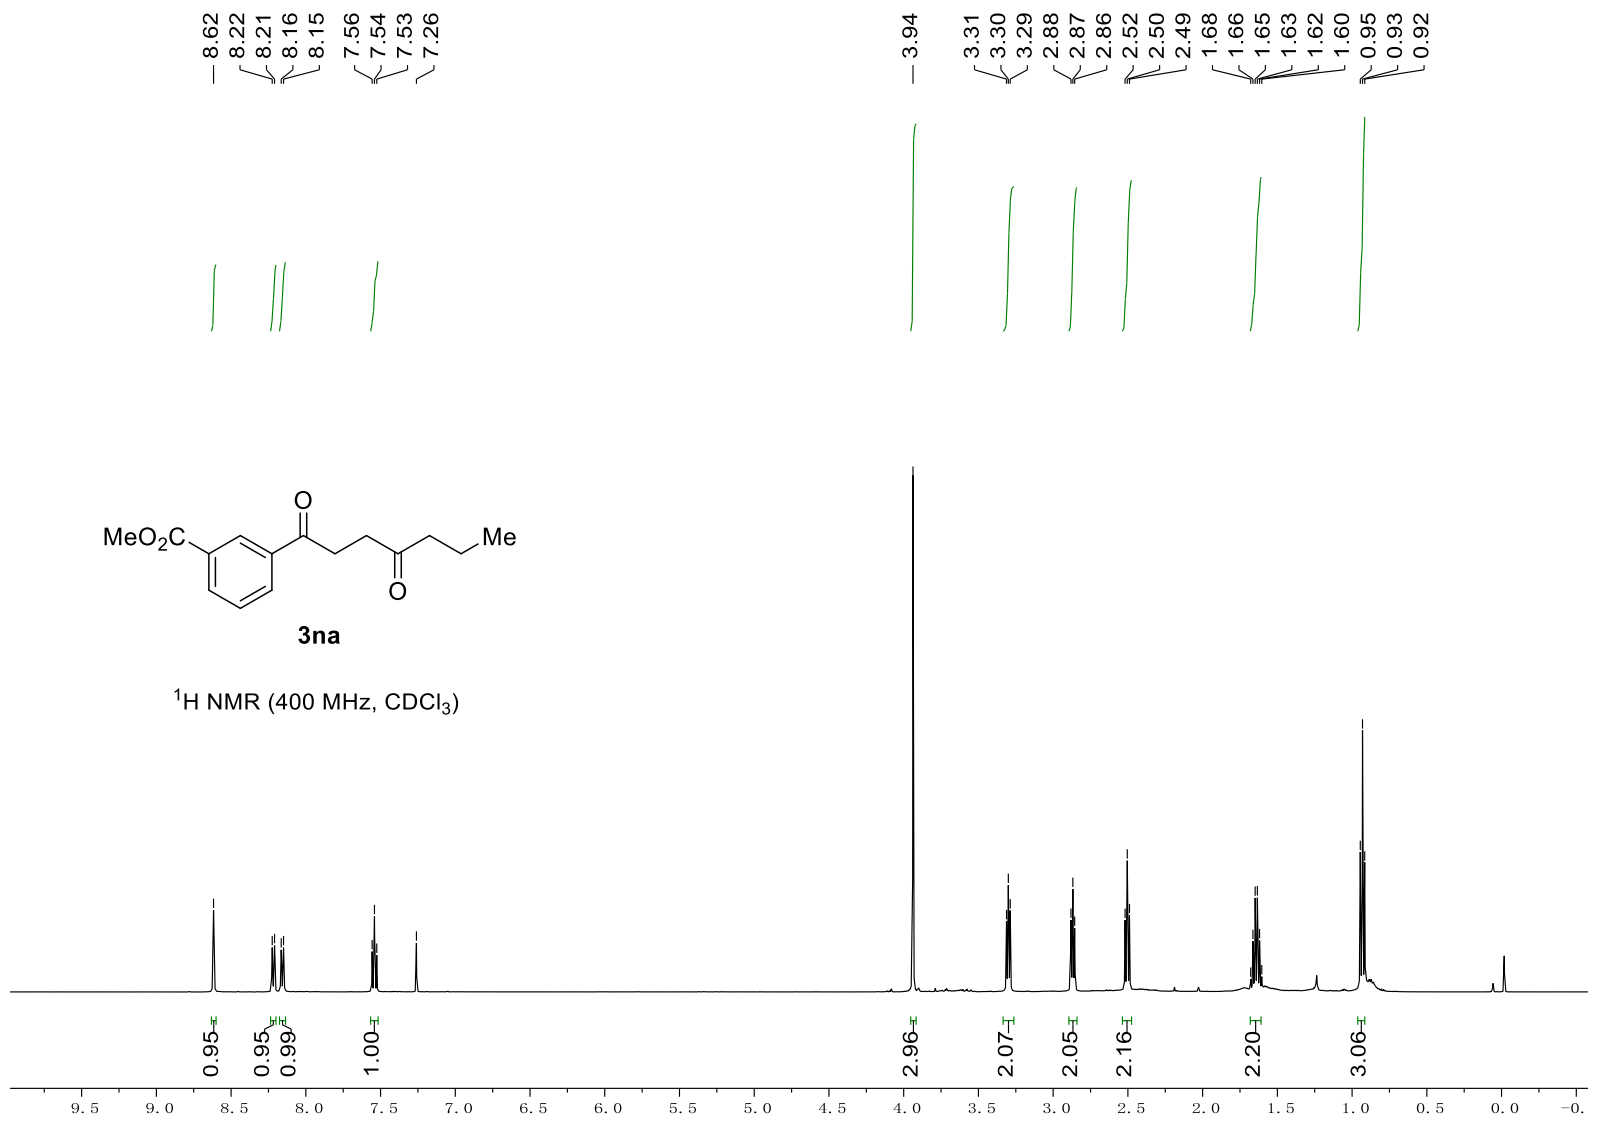

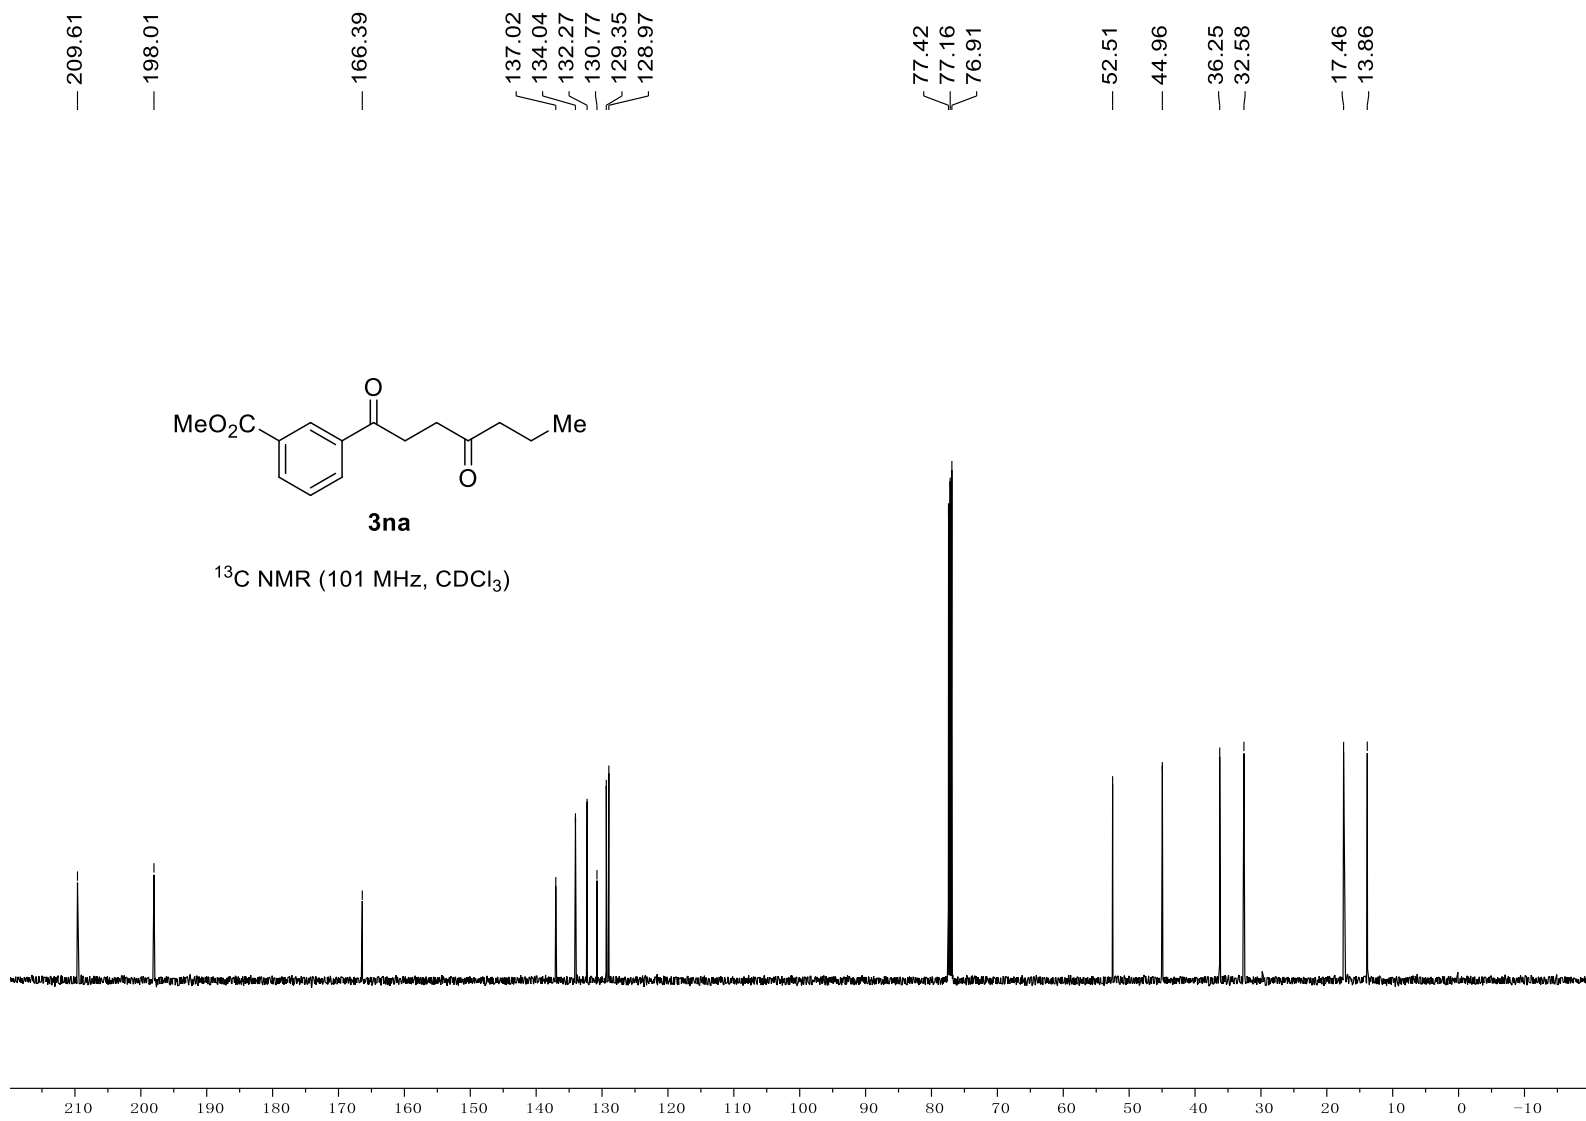

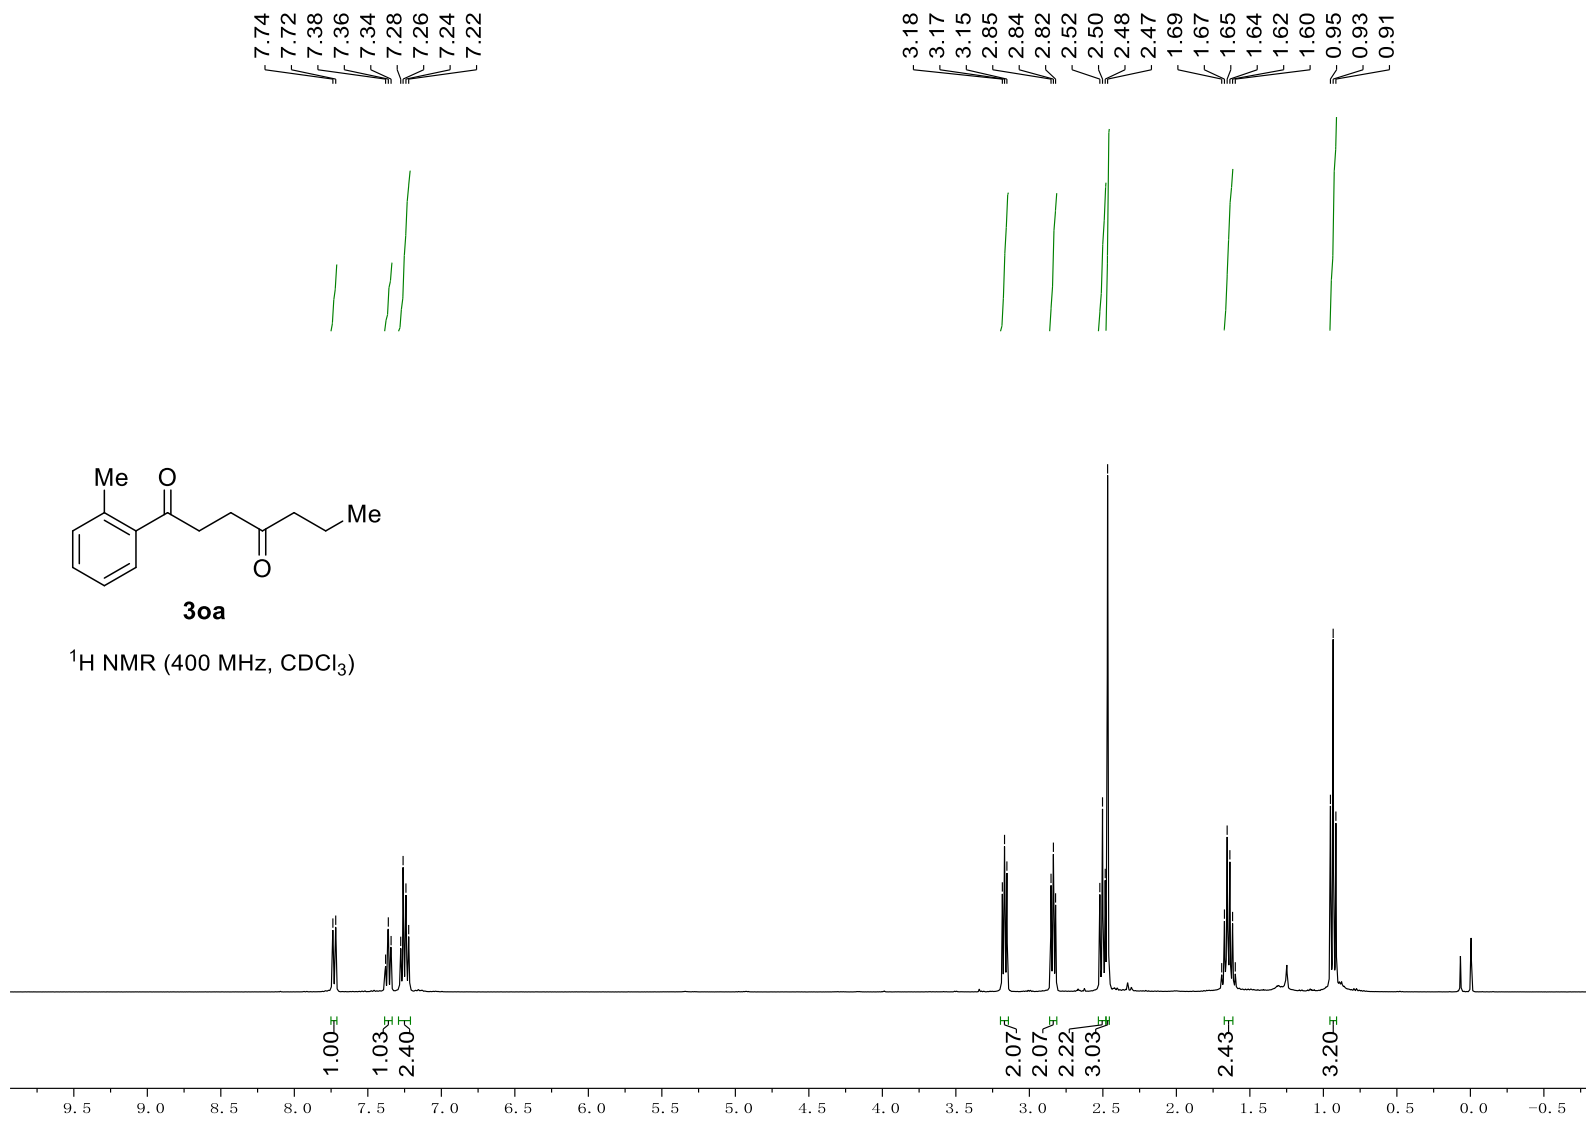

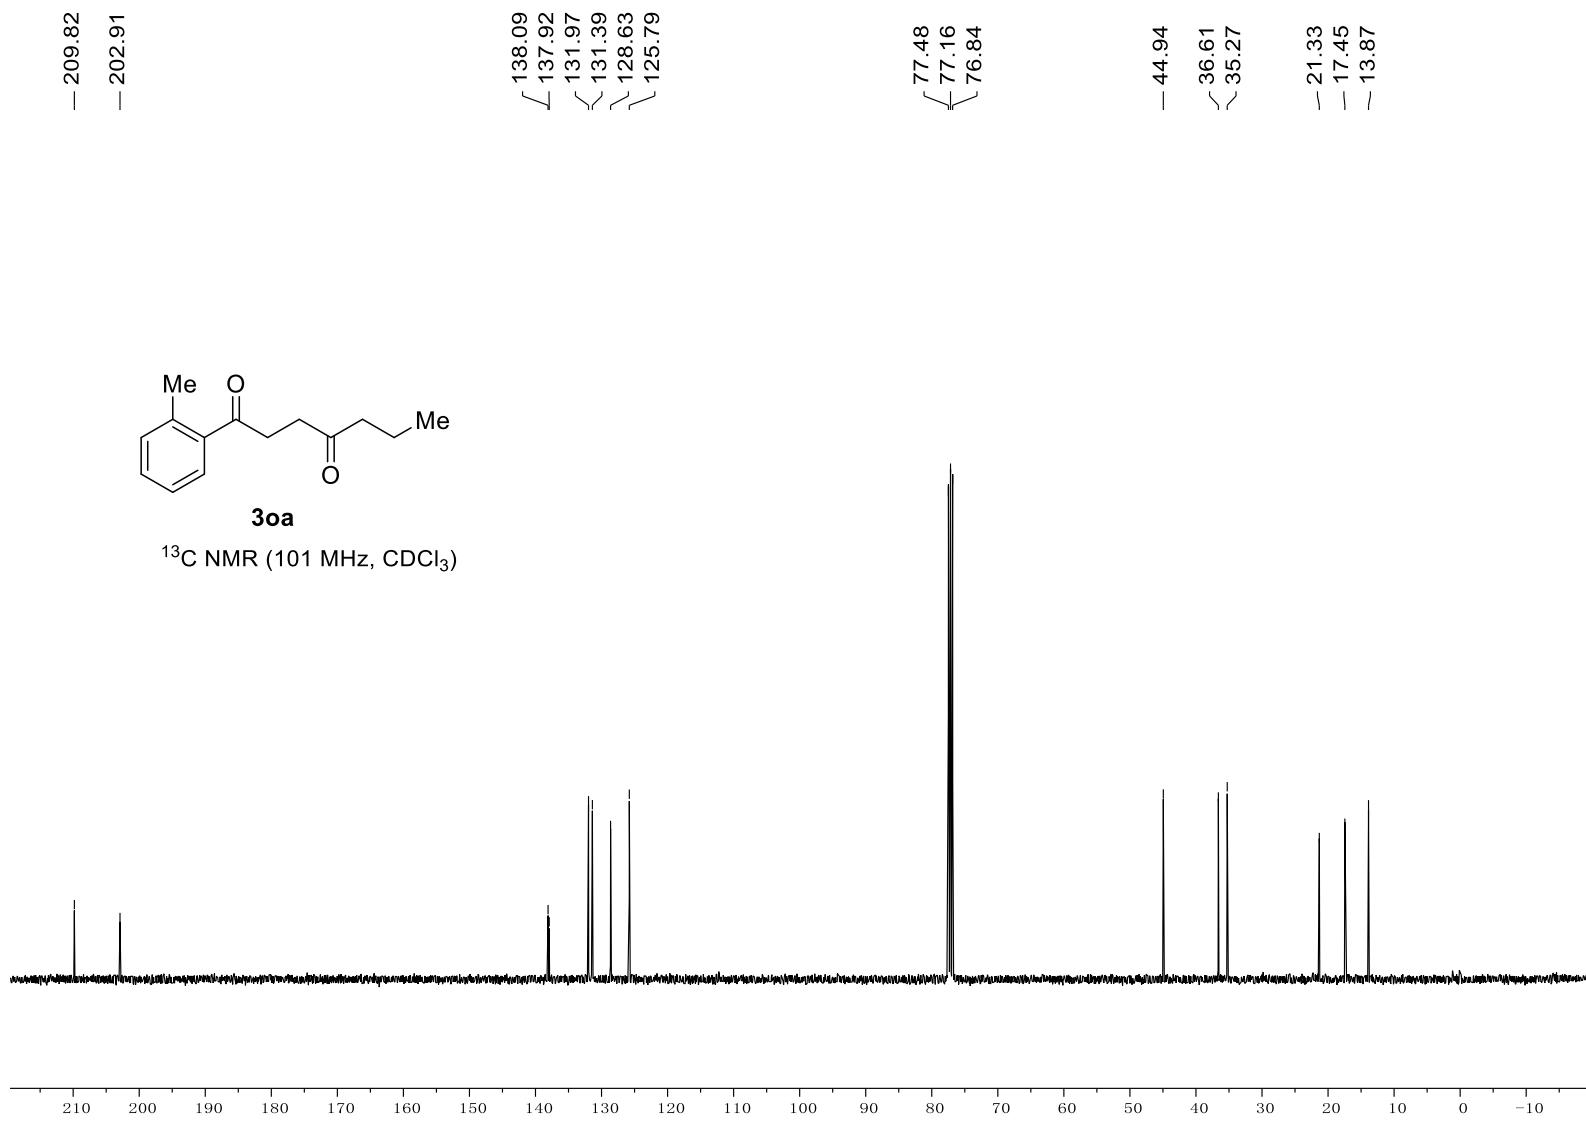

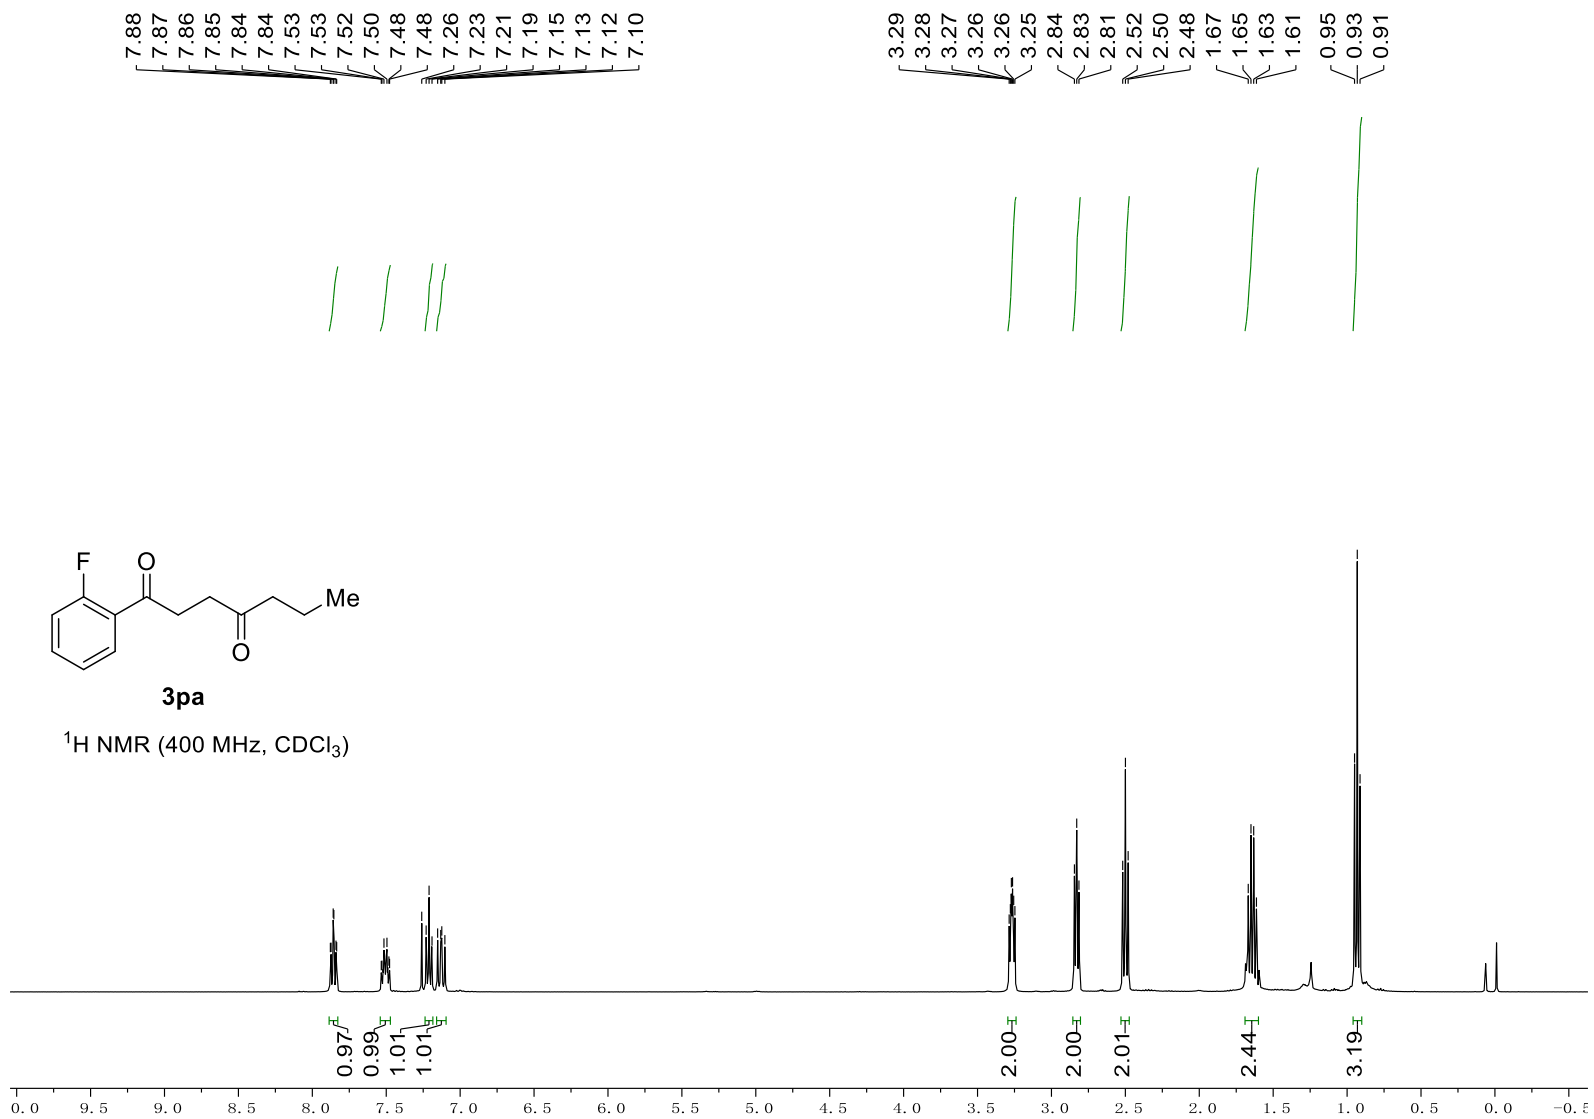

— 209.65  
 { 197.12  
 { 197.08  
  
 { 163.49  
 { 160.95  
  
 { 134.76  
 { 134.67  
 { 130.75  
 { 130.72  
 { 125.50  
 { 125.37  
 { 124.53  
 { 124.50  
 { 116.92  
 { 116.69  
  
 { 77.48  
 { 77.16  
 { 76.84  
  
 { 44.94  
 { 37.40  
 { 37.32  
 { 36.37  
 { 36.35  
  
 — 17.44  
 — 13.87

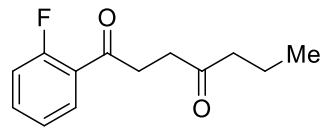

**3pa**

<sup>13</sup>C NMR (101 MHz, CDCl<sub>3</sub>)

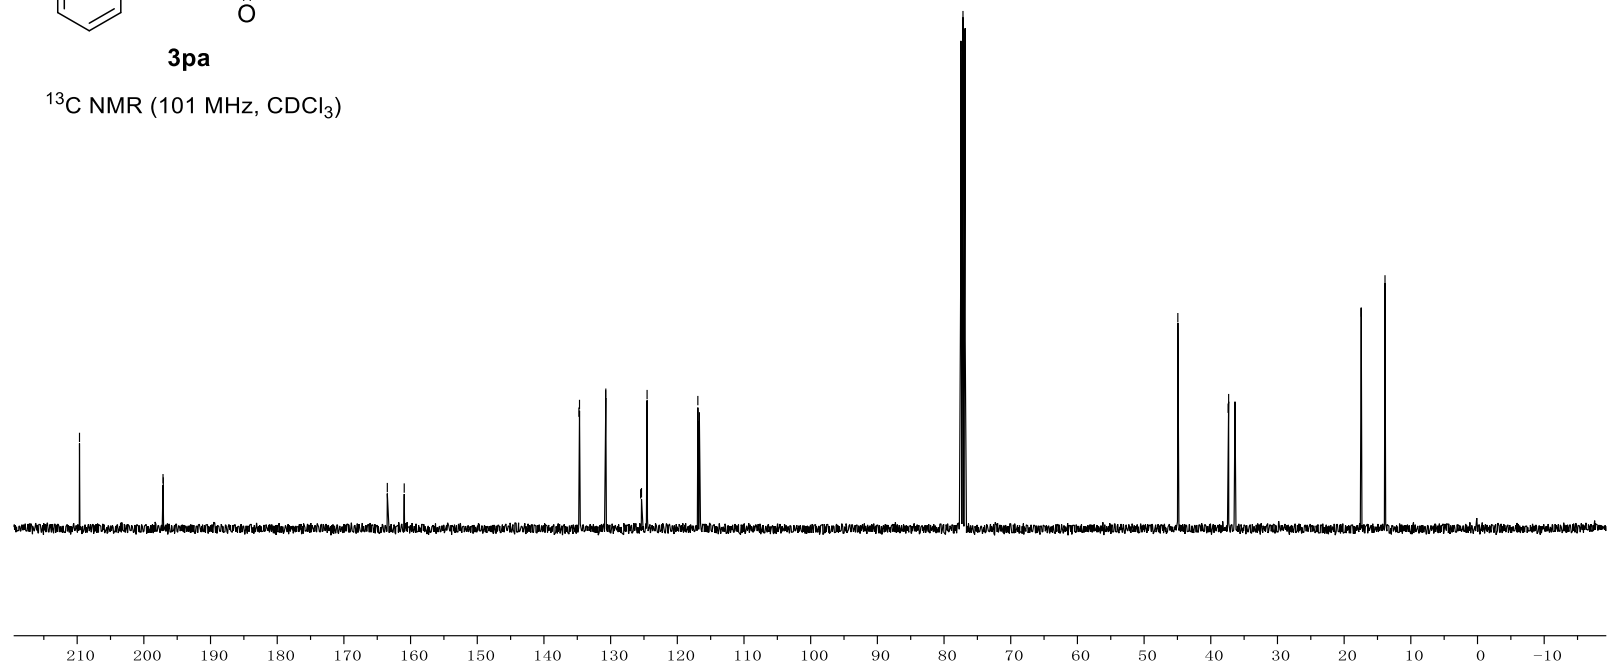

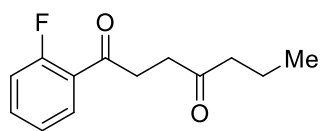

**3pa**

$^{19}\text{F}$  NMR (376 MHz,  $\text{CDCl}_3$ )

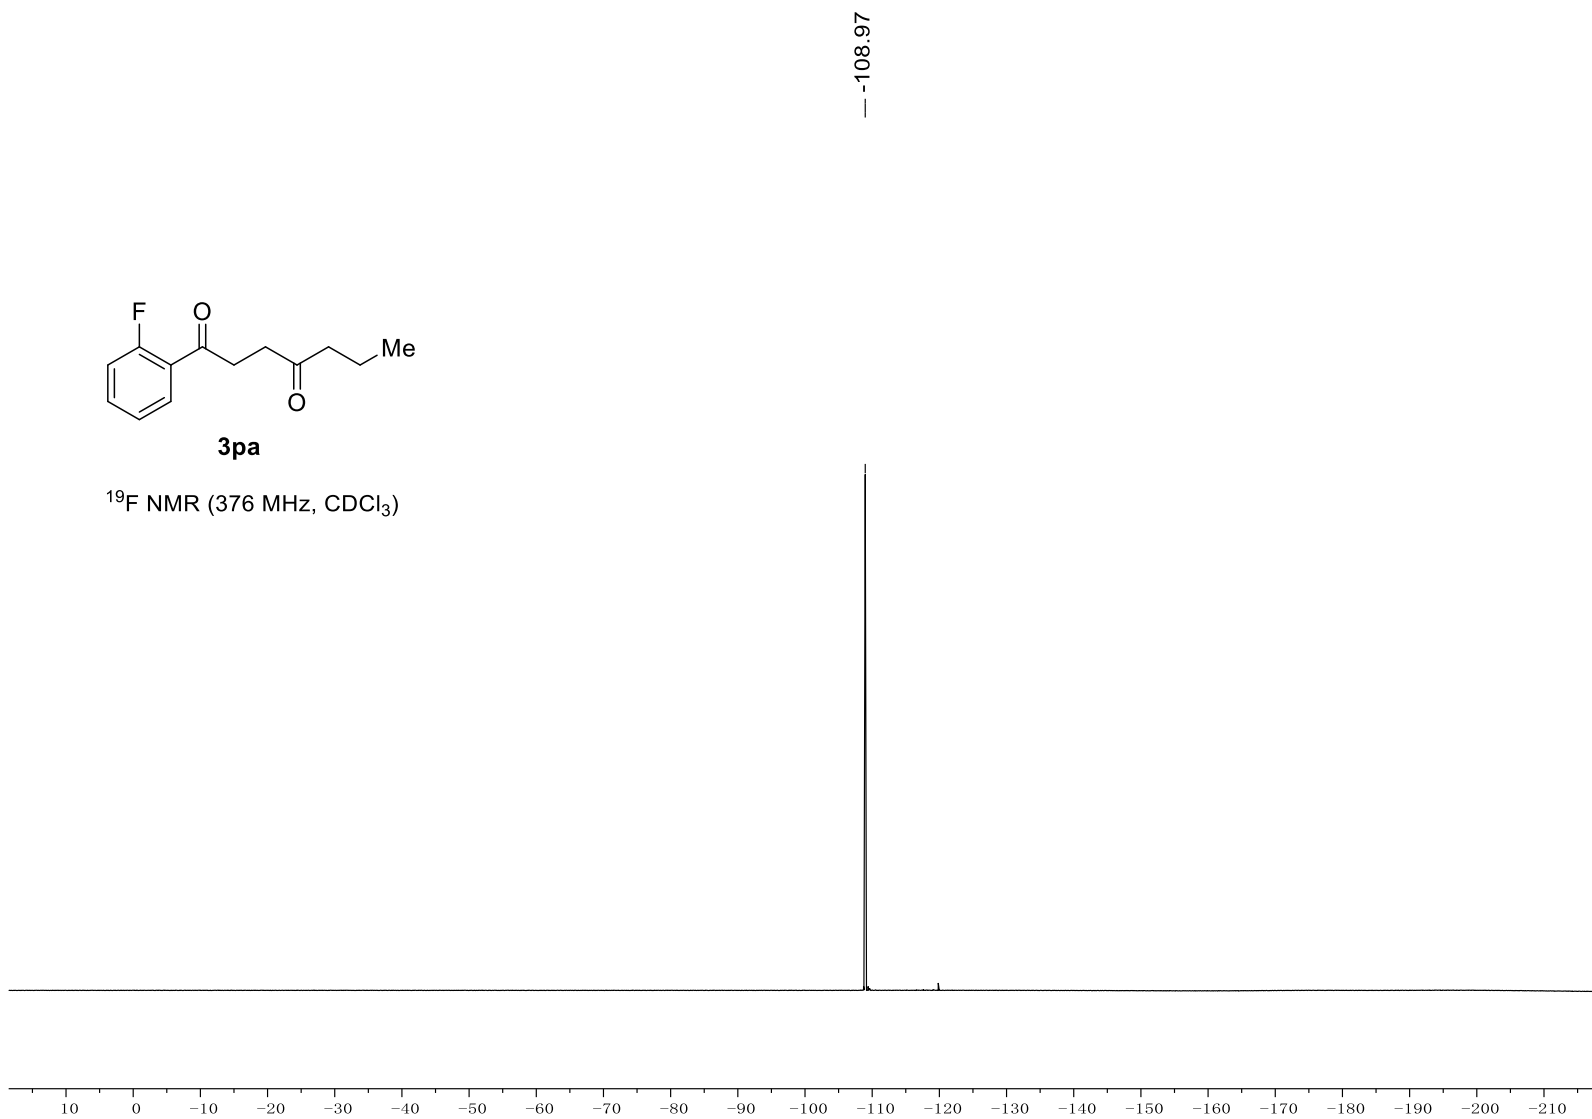

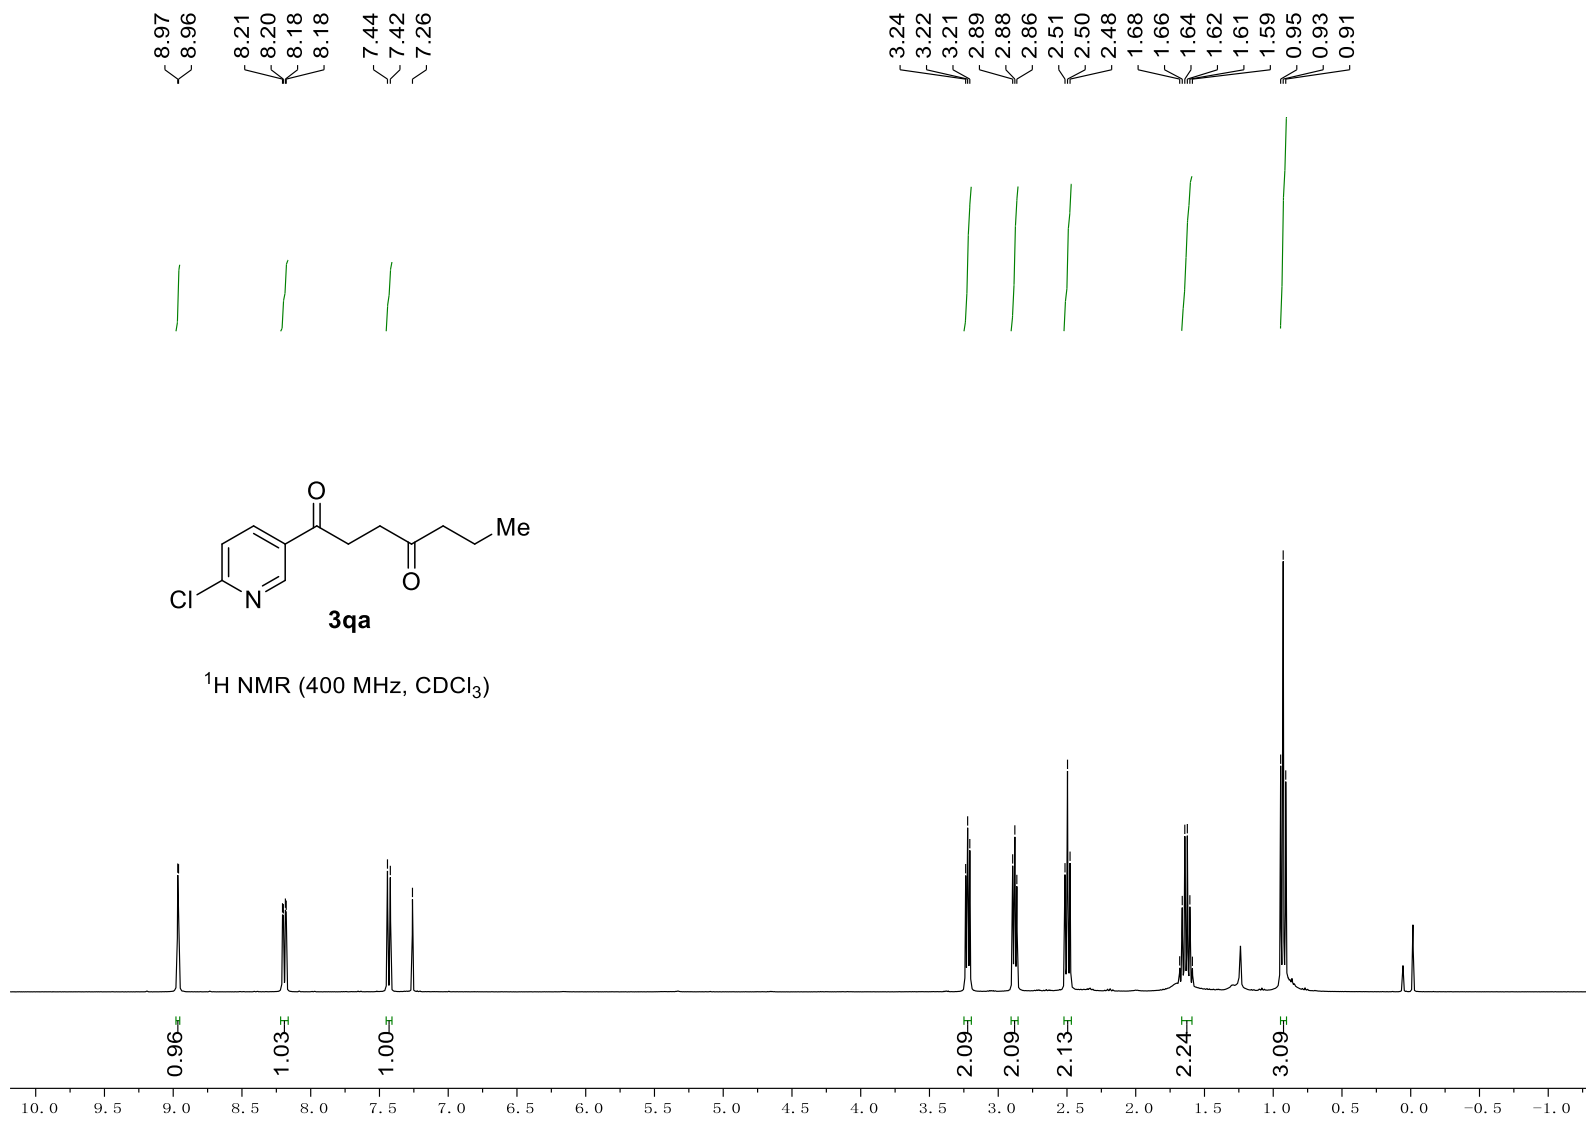



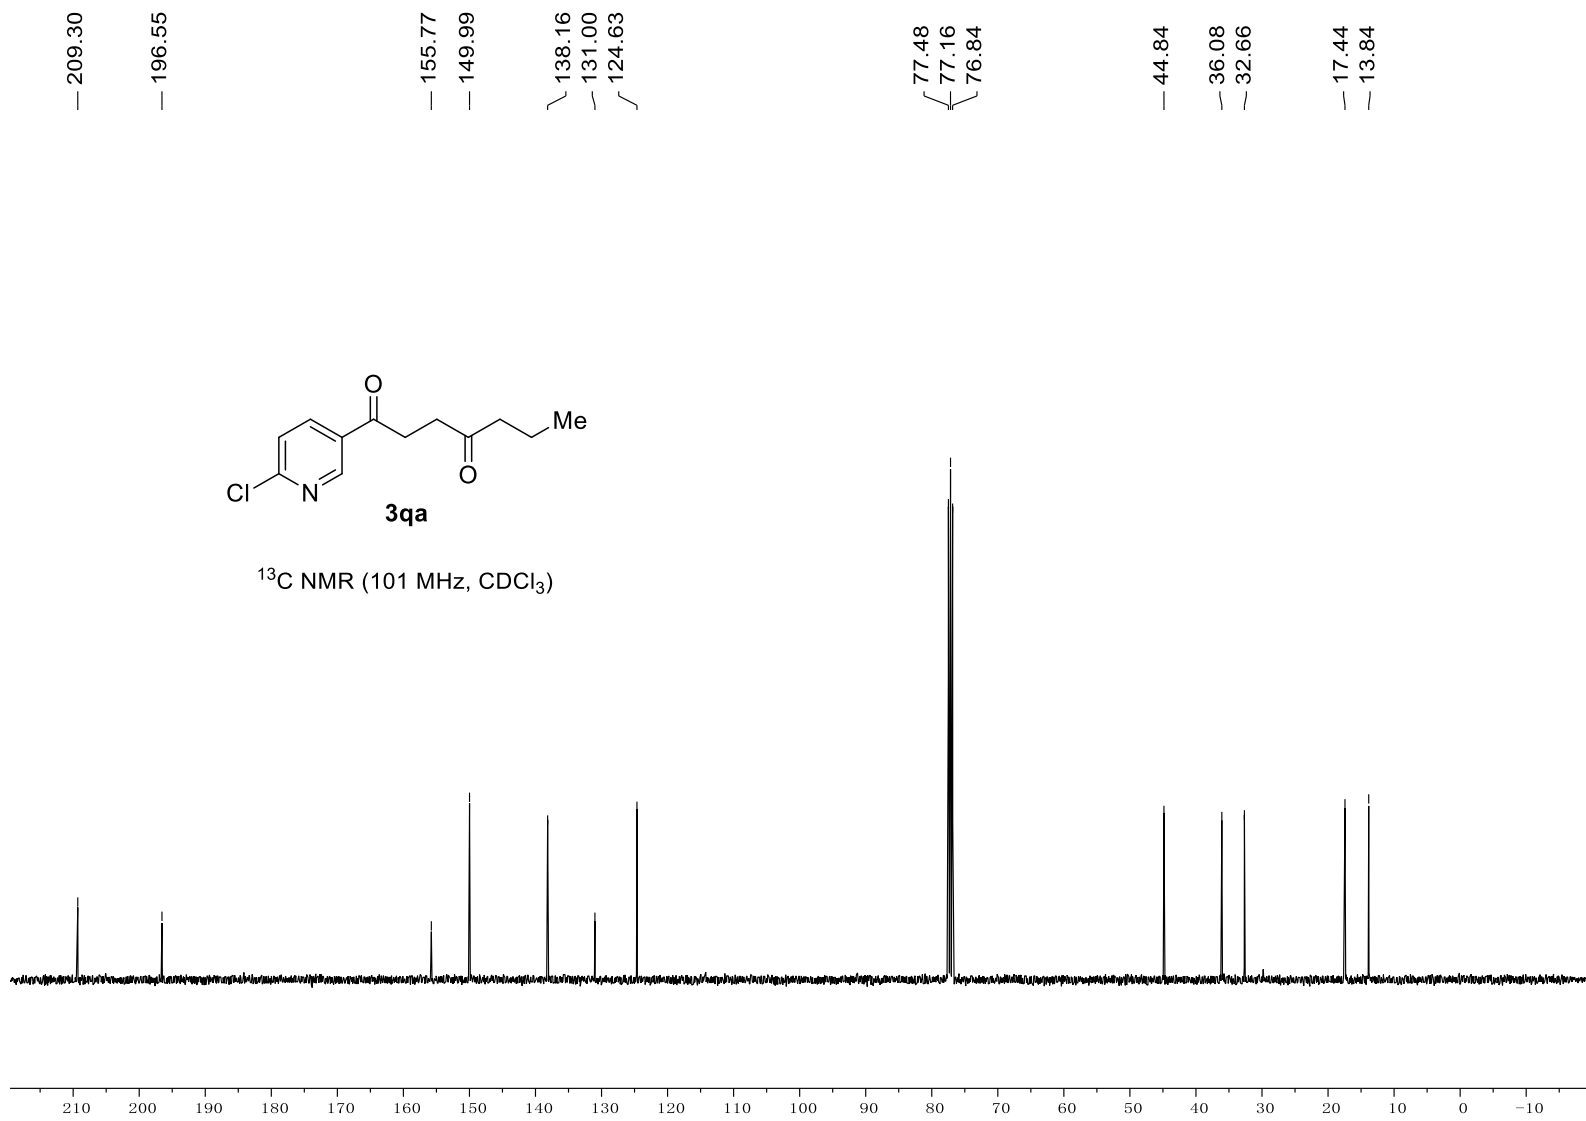

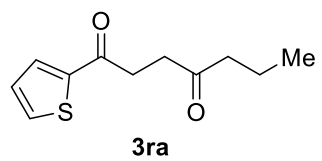

<sup>1</sup>H NMR (400 MHz, CDCl<sub>3</sub>)

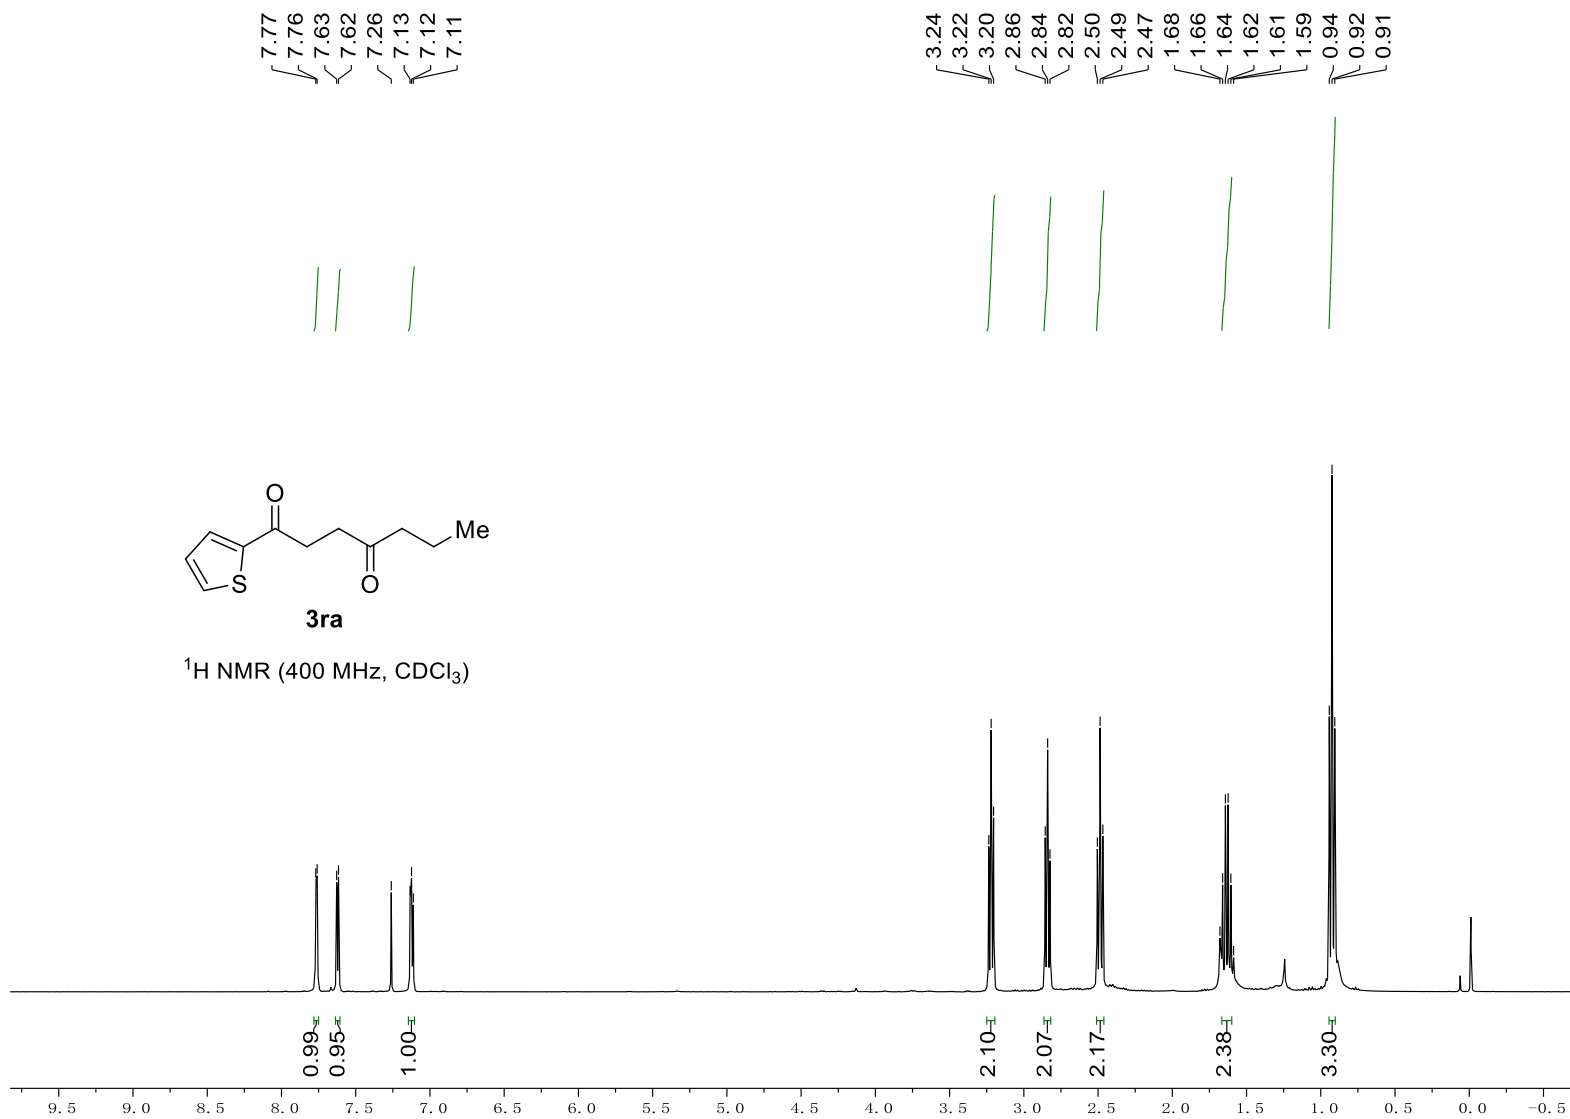

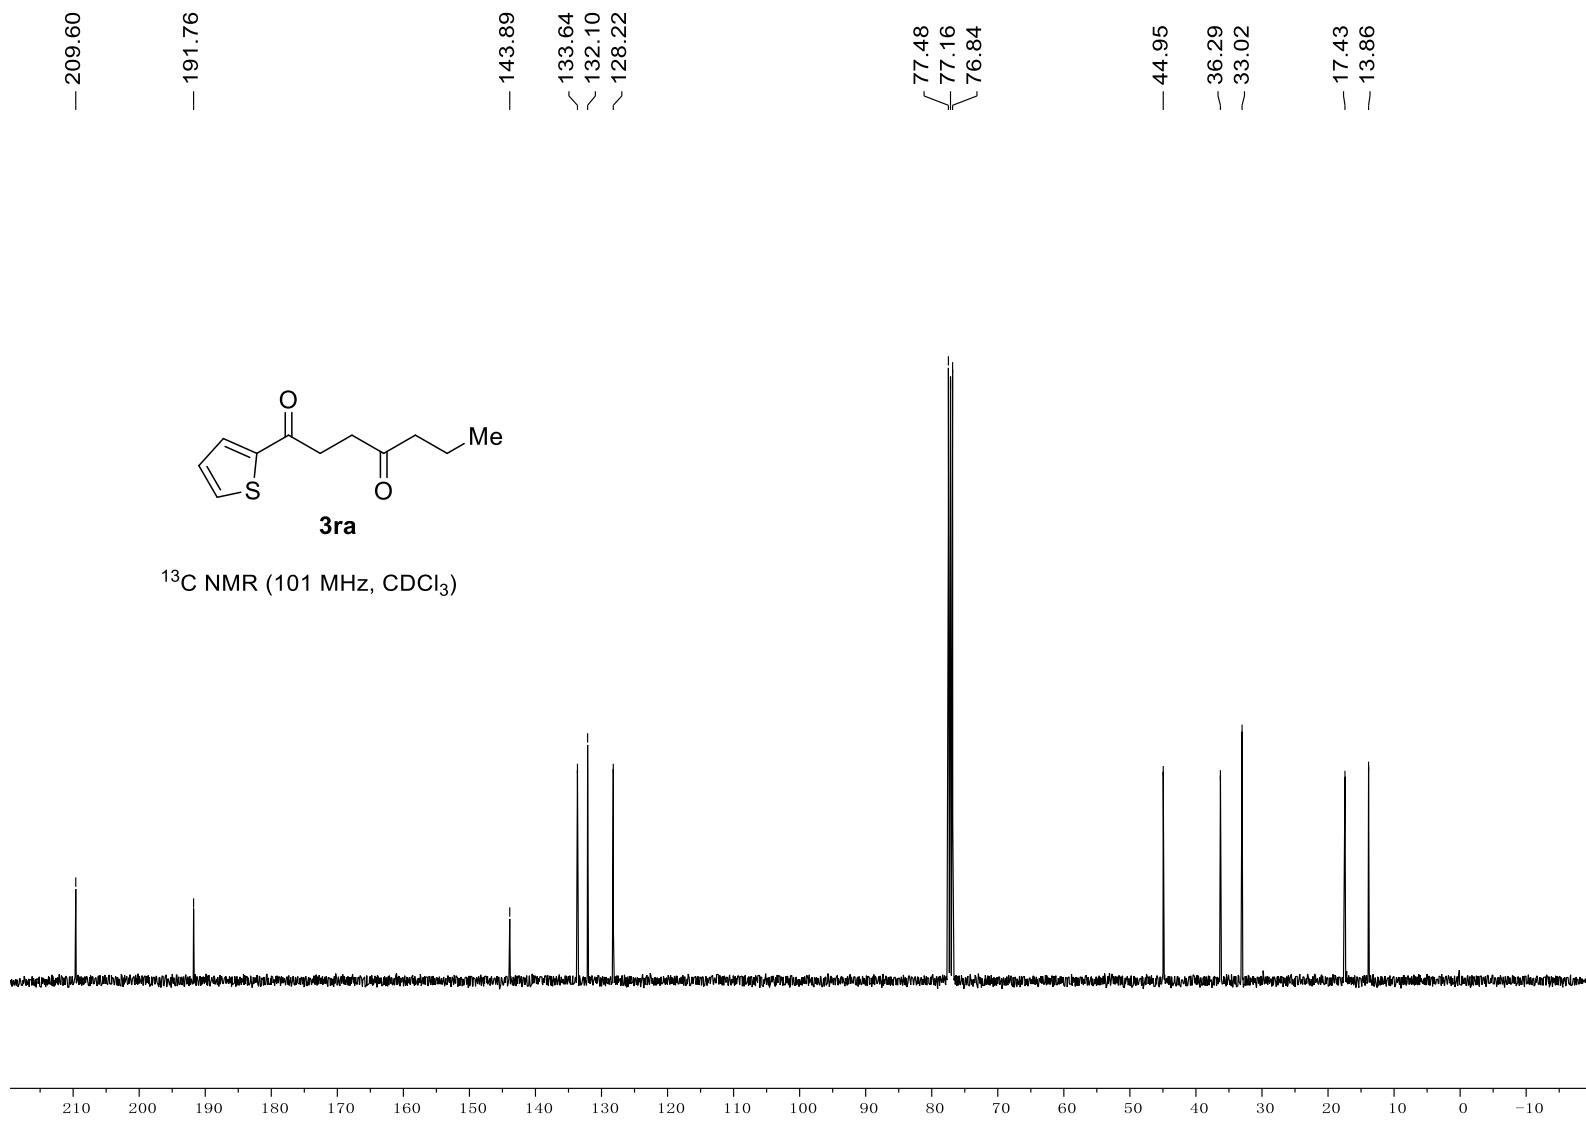

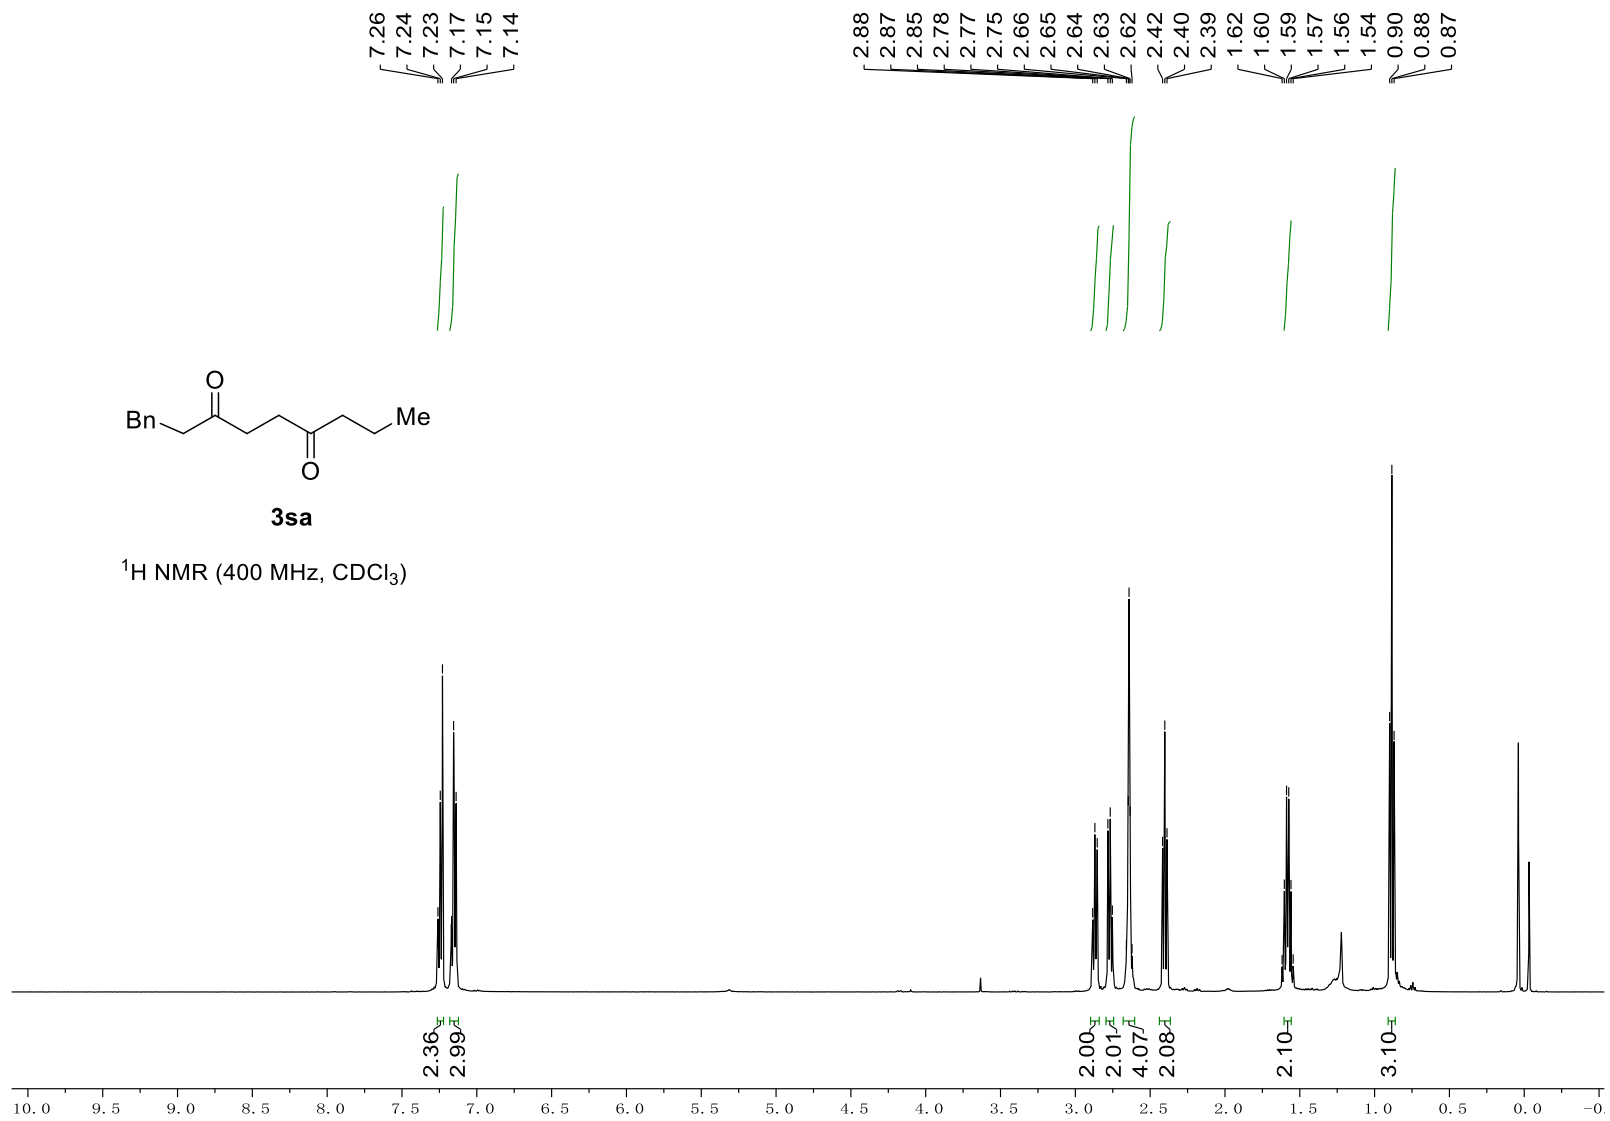

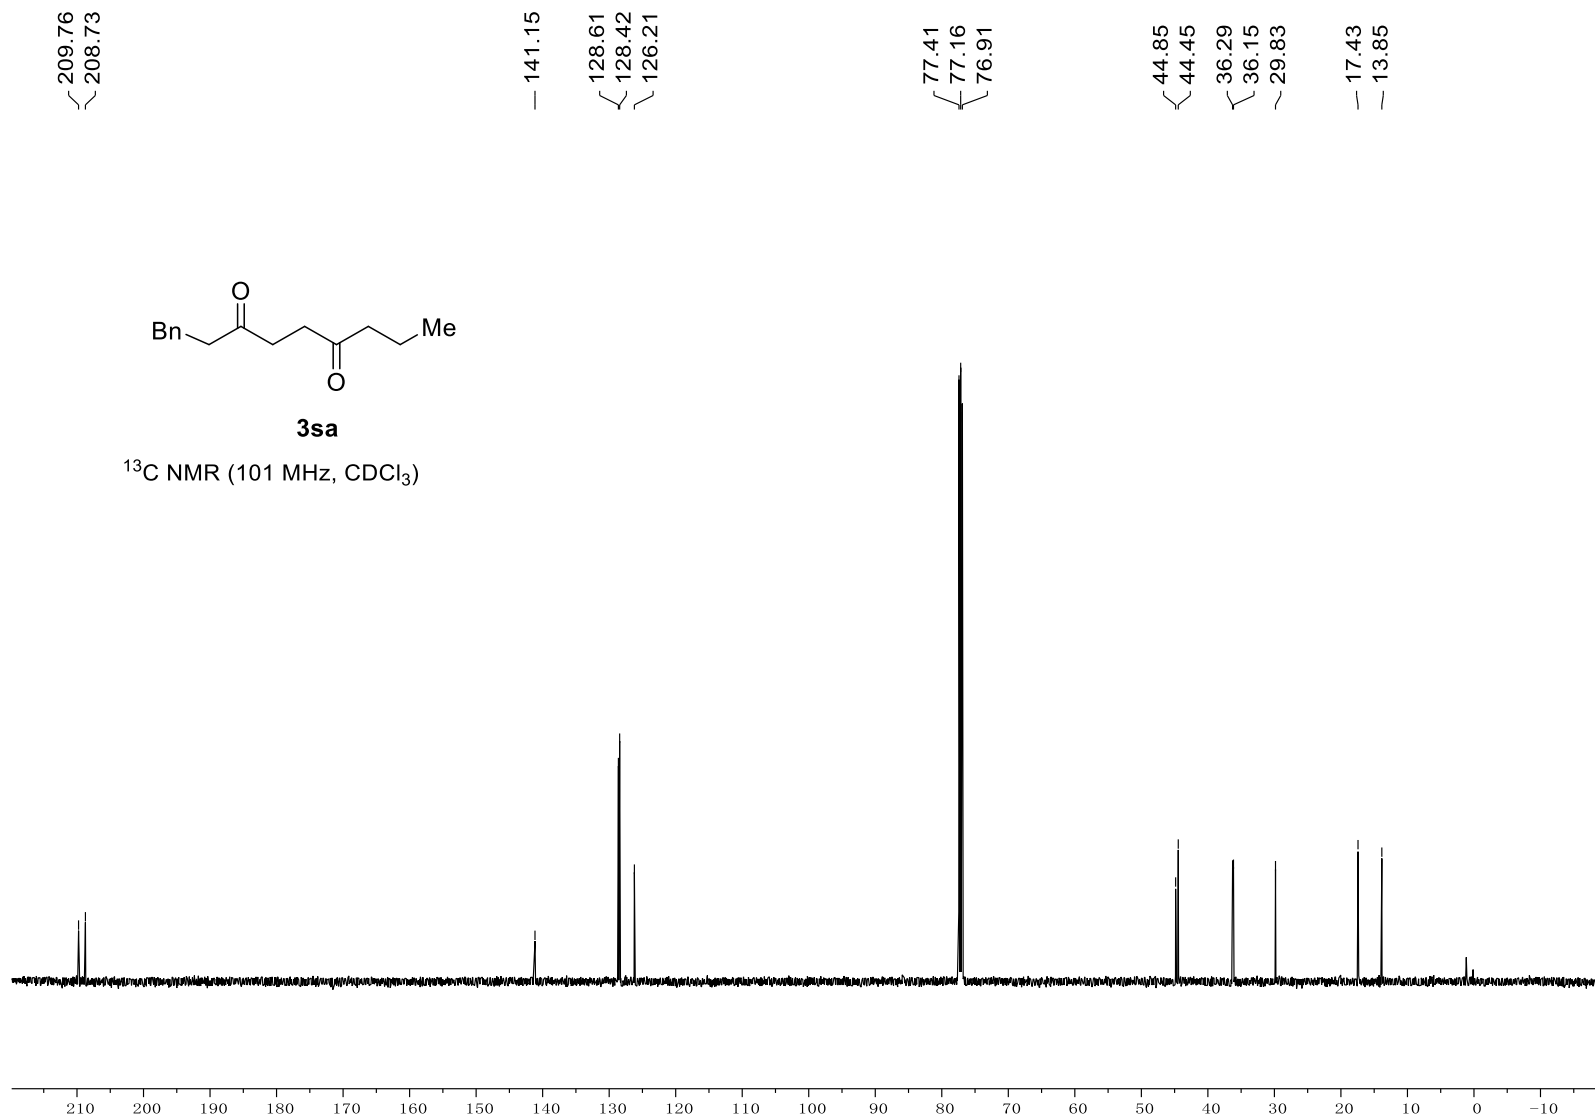

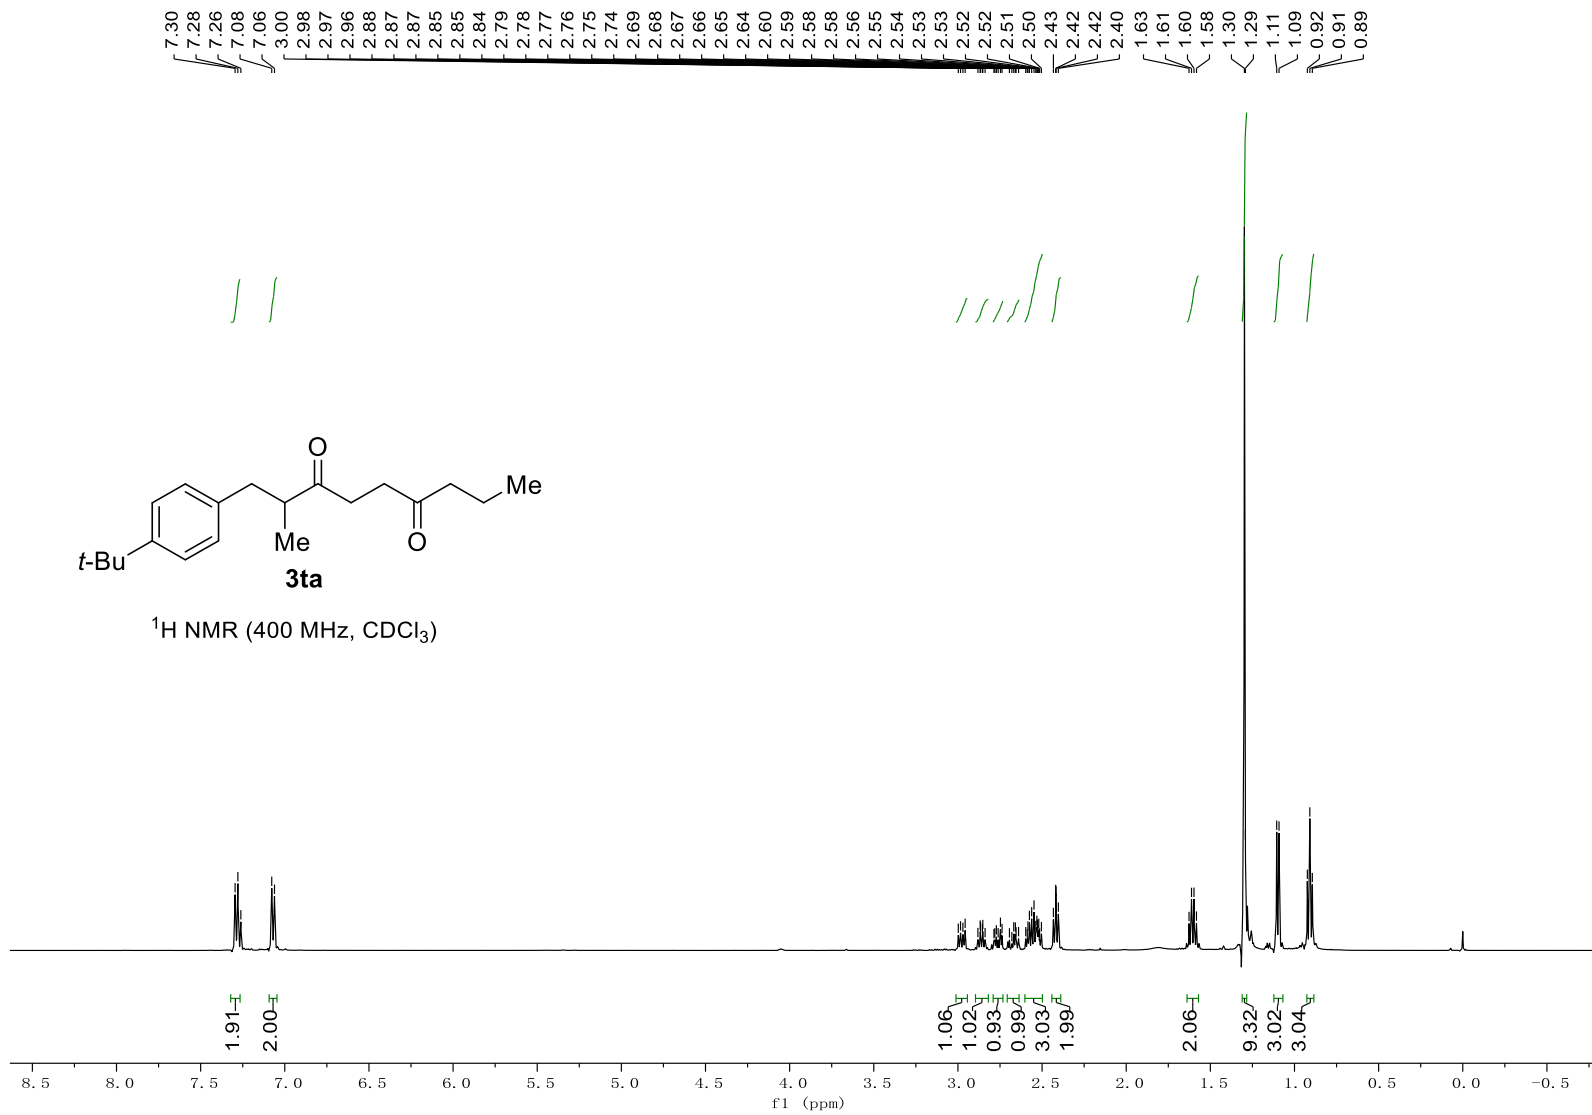

— 213.03  
— 209.77

— 149.14  
— 136.72  
— 128.73  
— 125.40

77.41  
77.16  
76.91

48.21  
44.89  
38.56  
36.04  
35.33  
34.49  
31.50

17.43  
16.52  
13.85

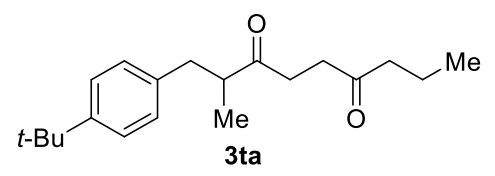

<sup>13</sup>C NMR (101 MHz, CDCl<sub>3</sub>)

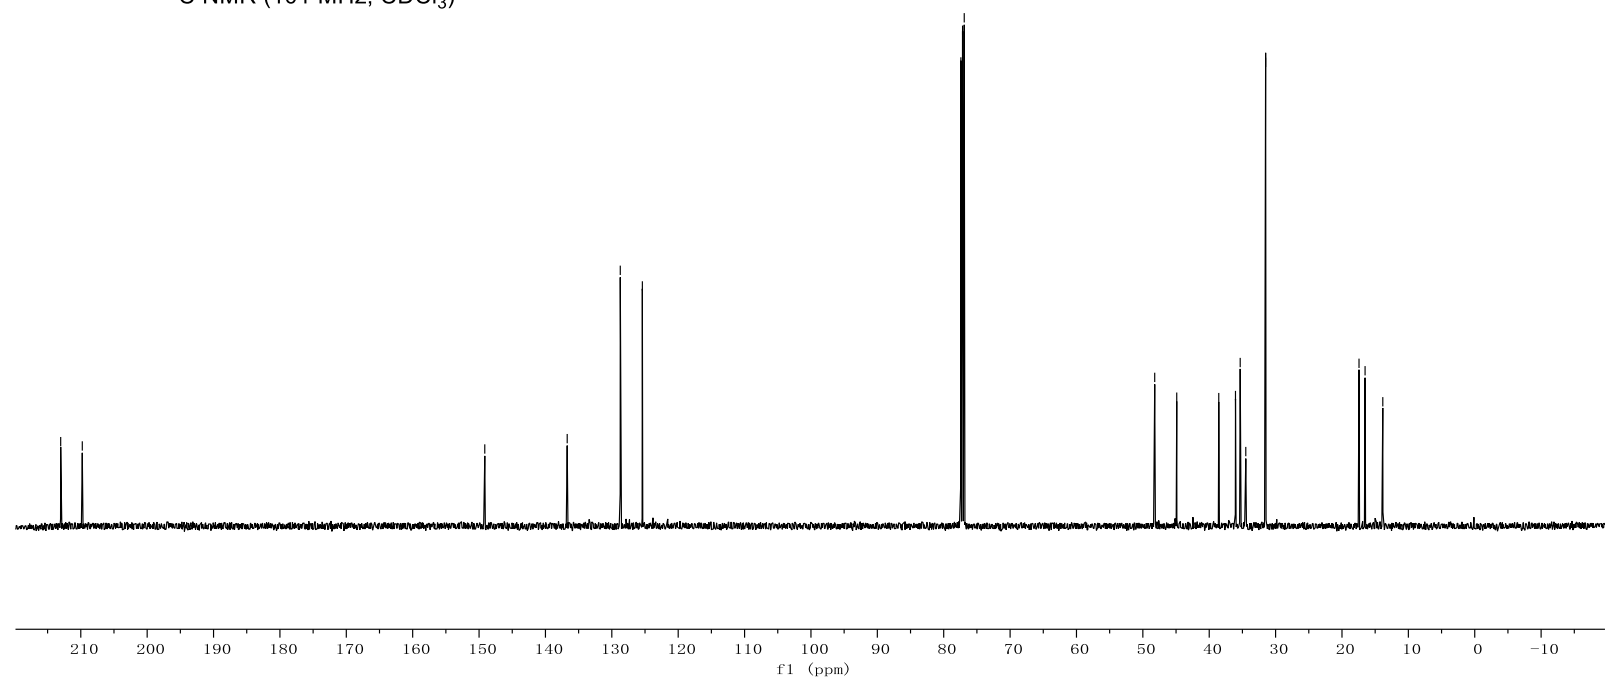

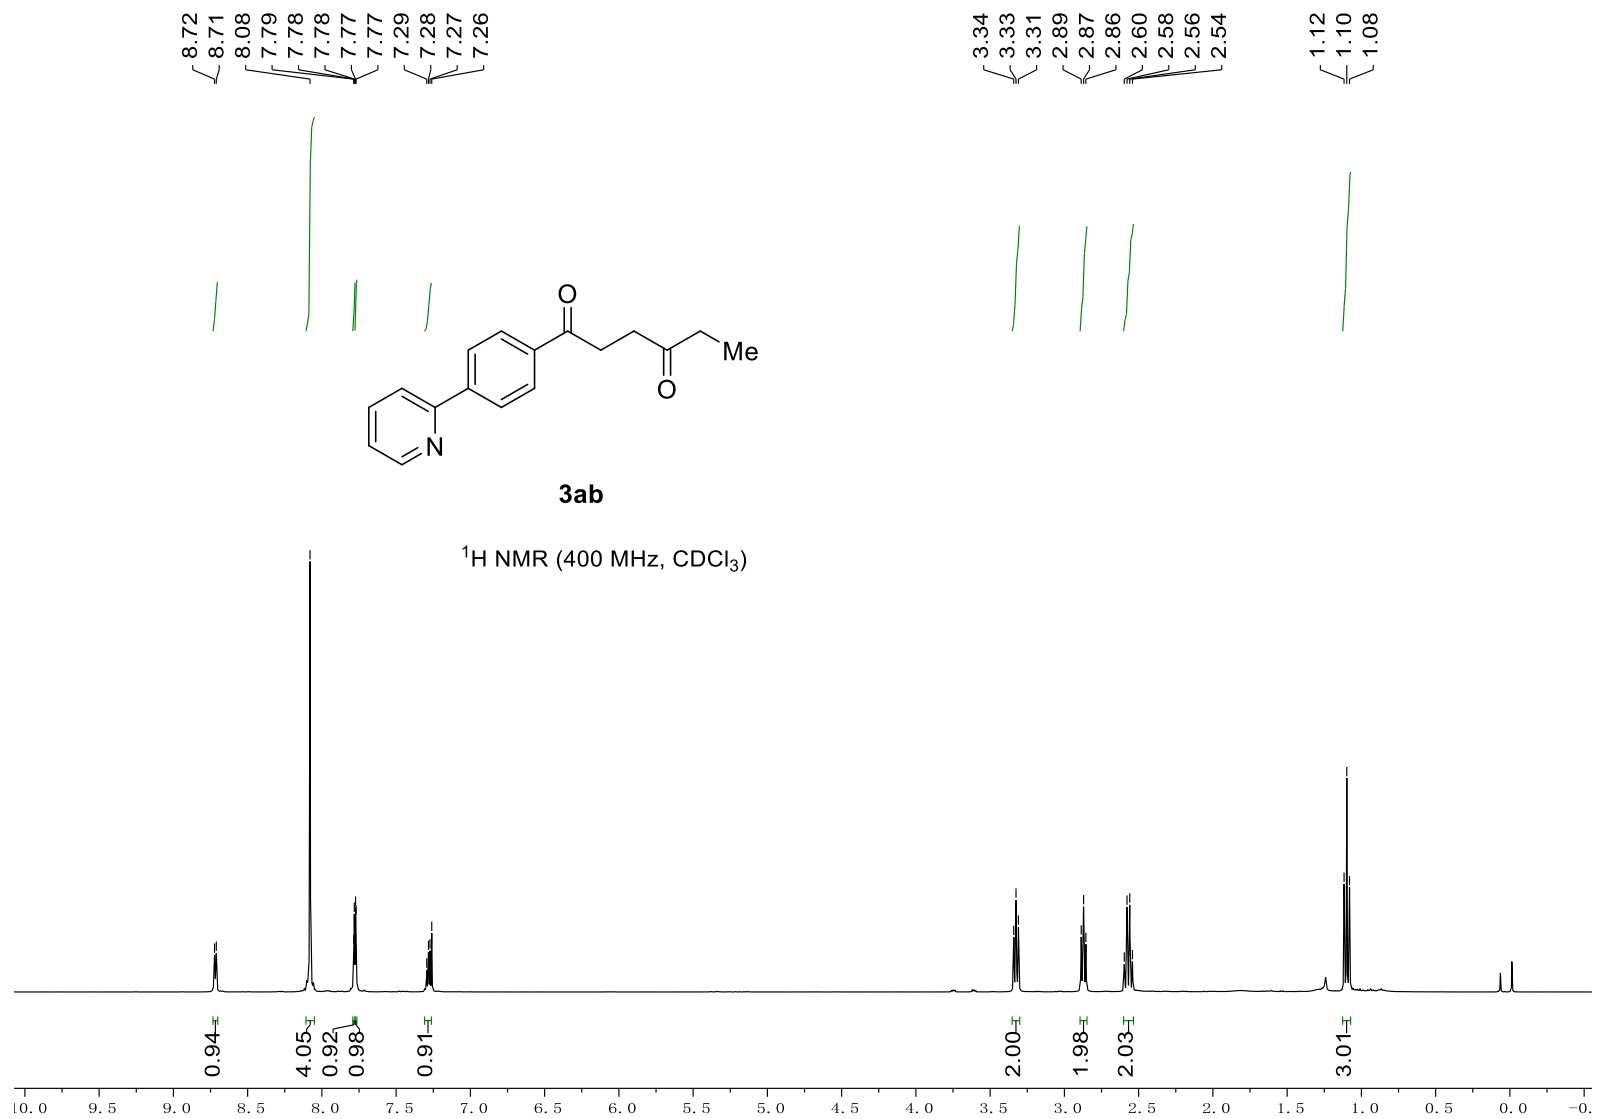



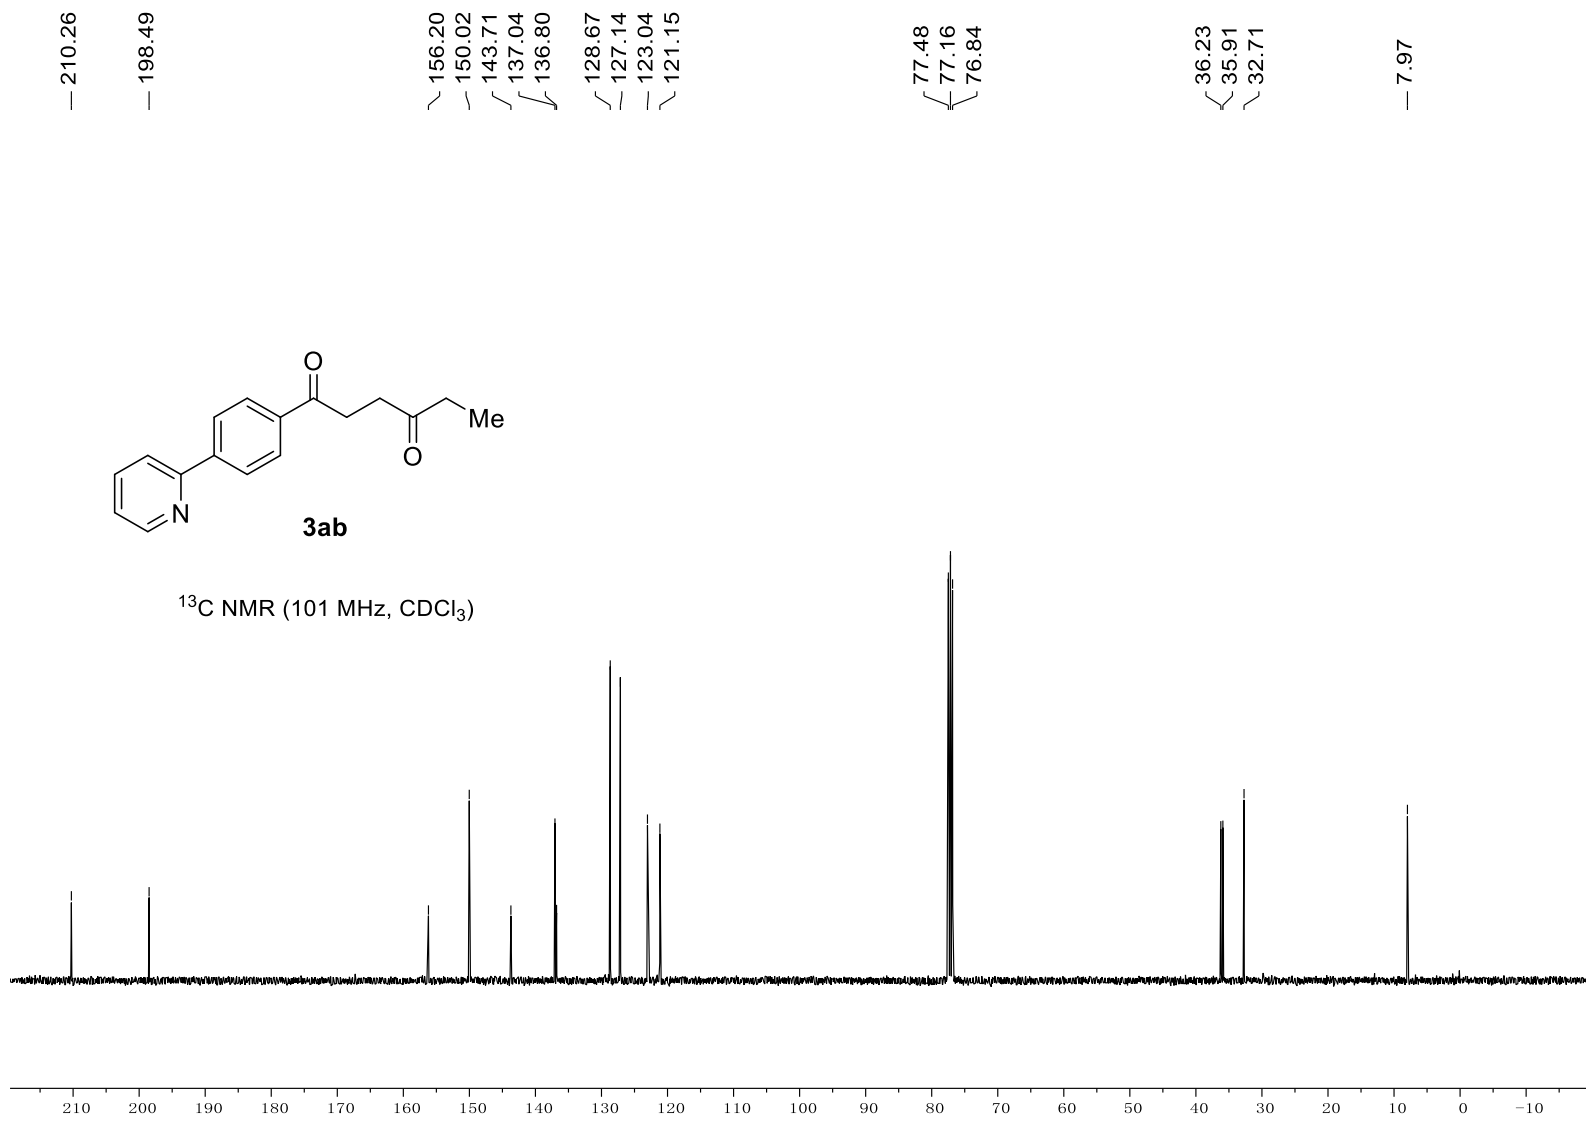

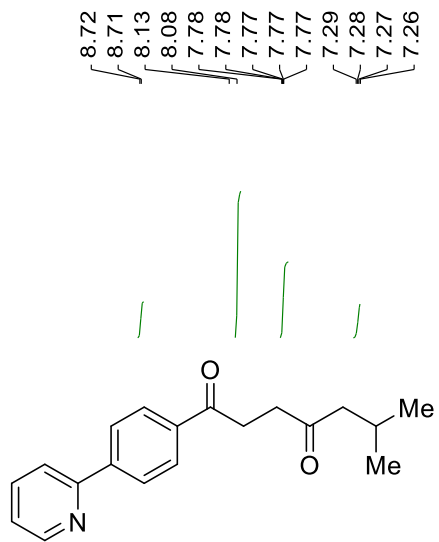

**3ac** <sup>1</sup>H NMR (400 MHz, CDCl<sub>3</sub>)

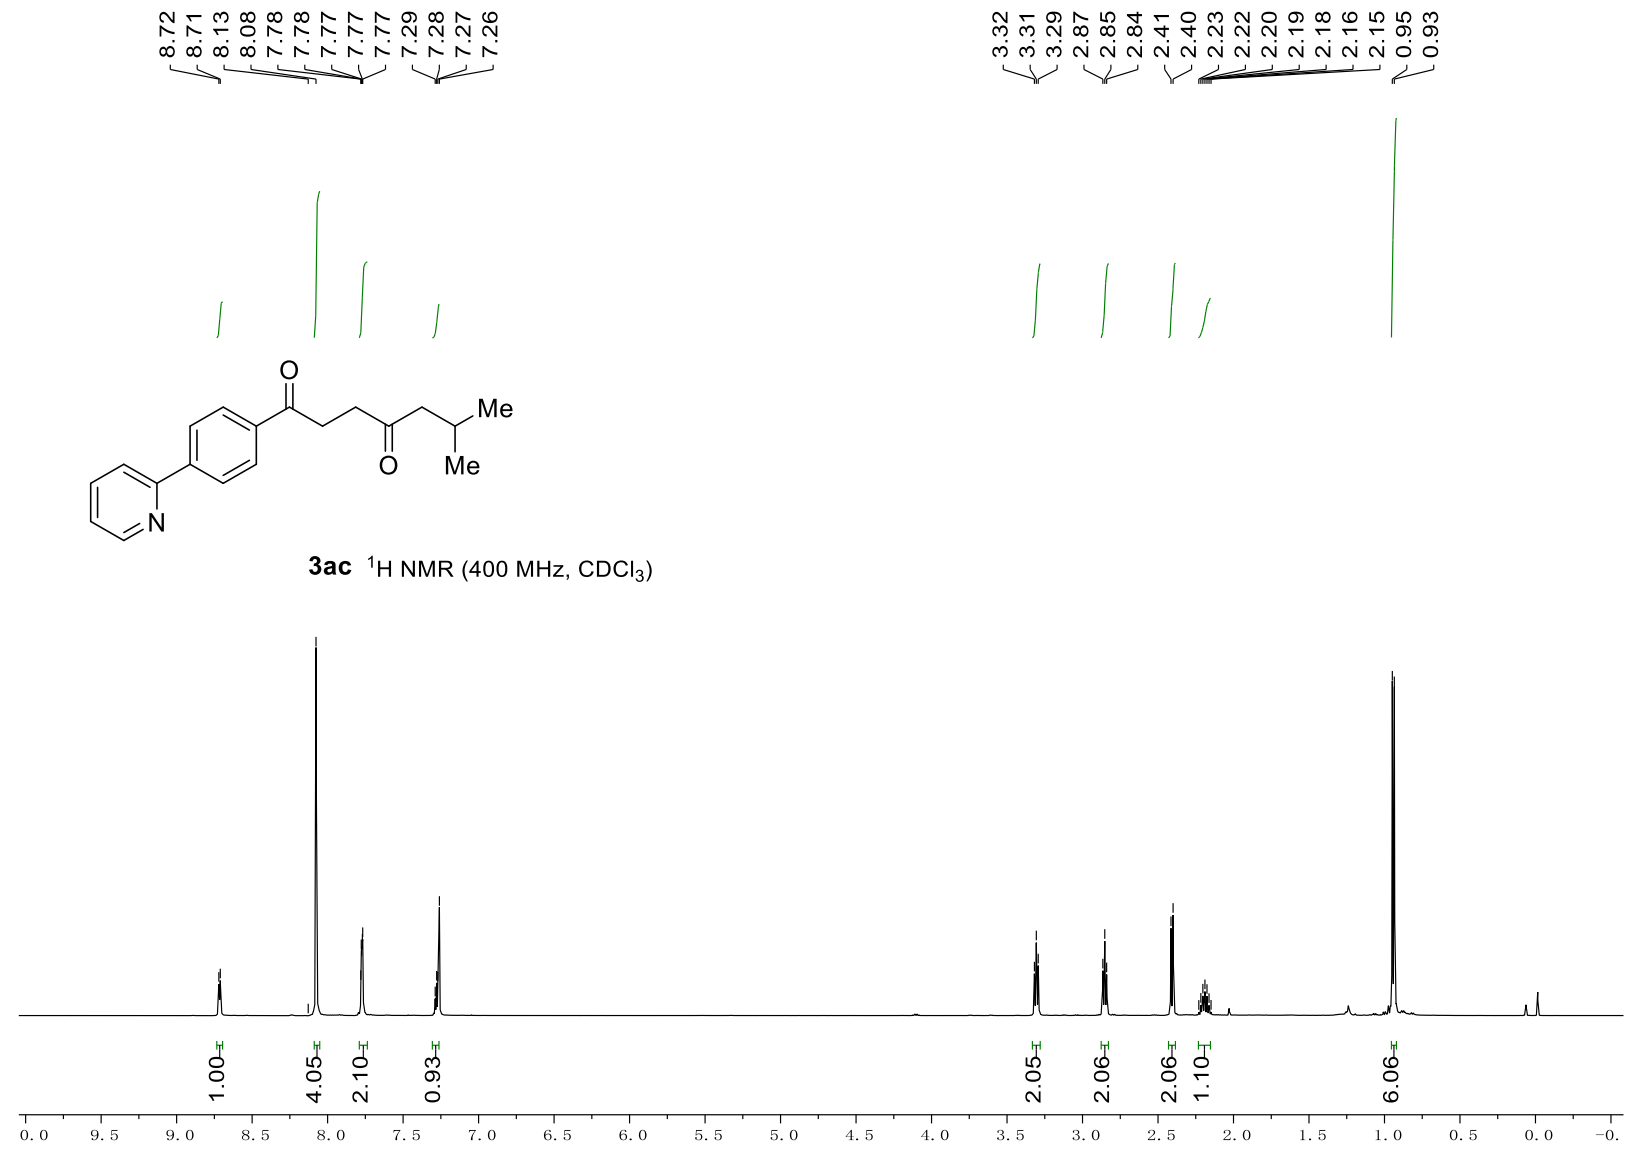

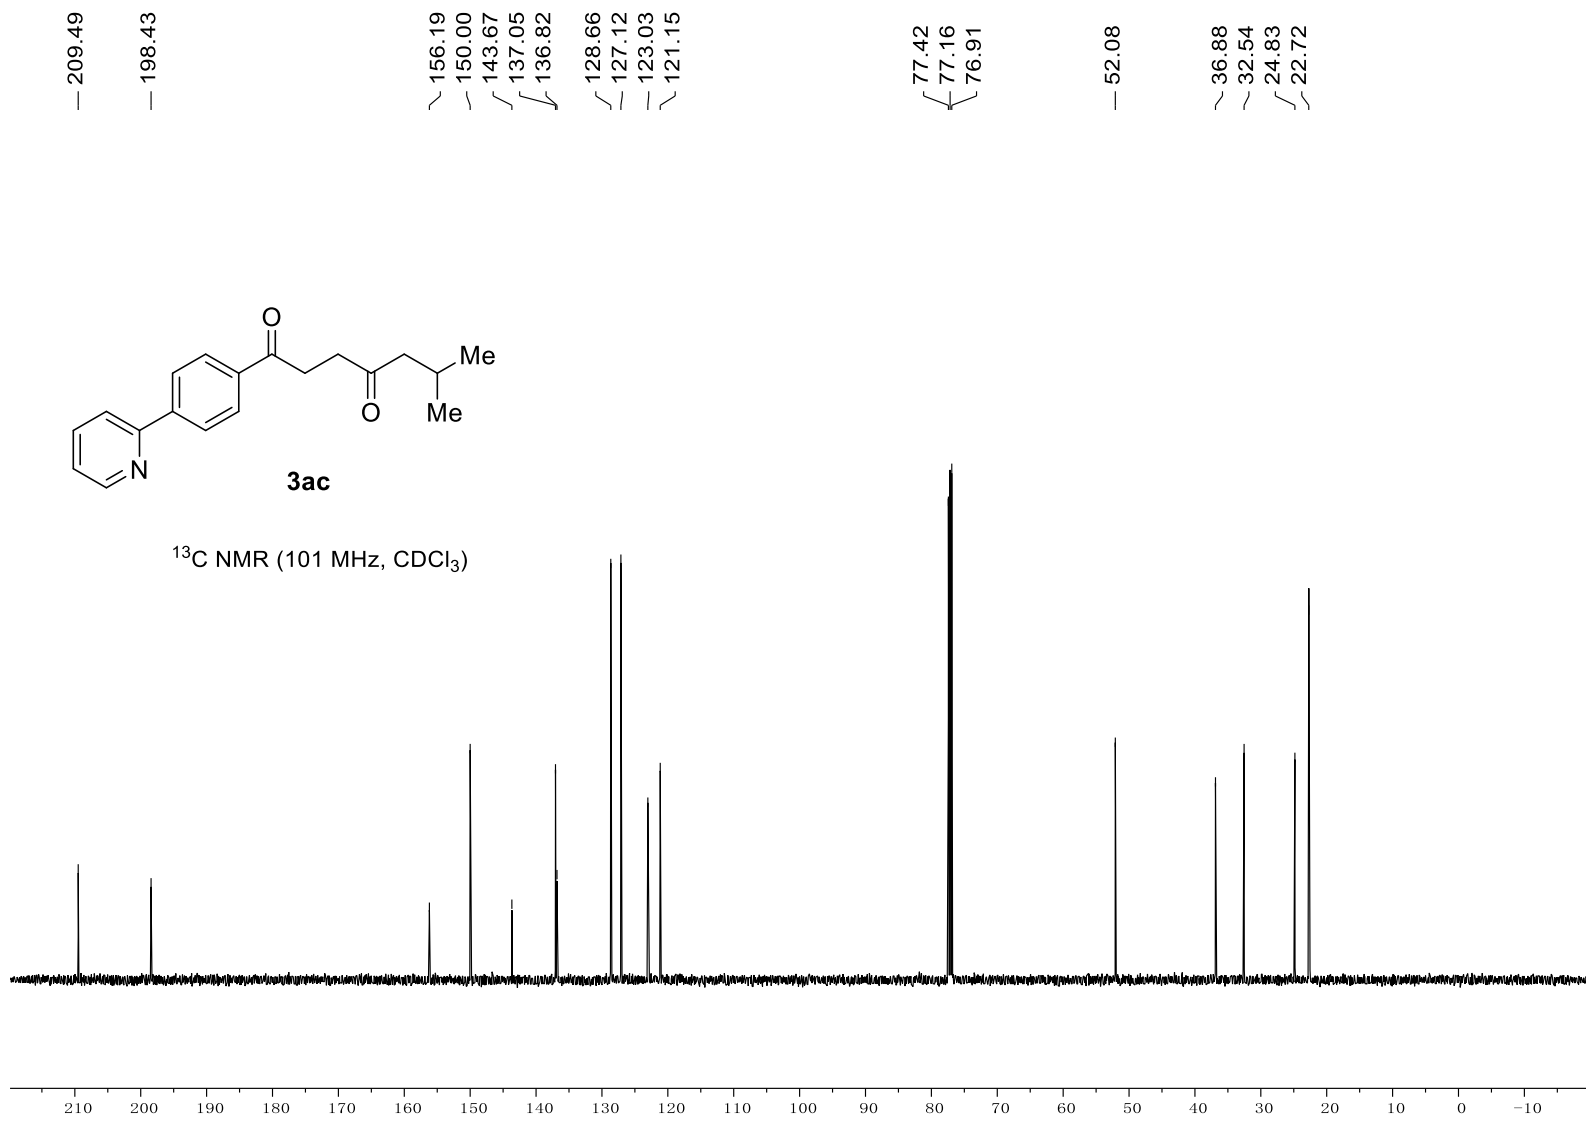

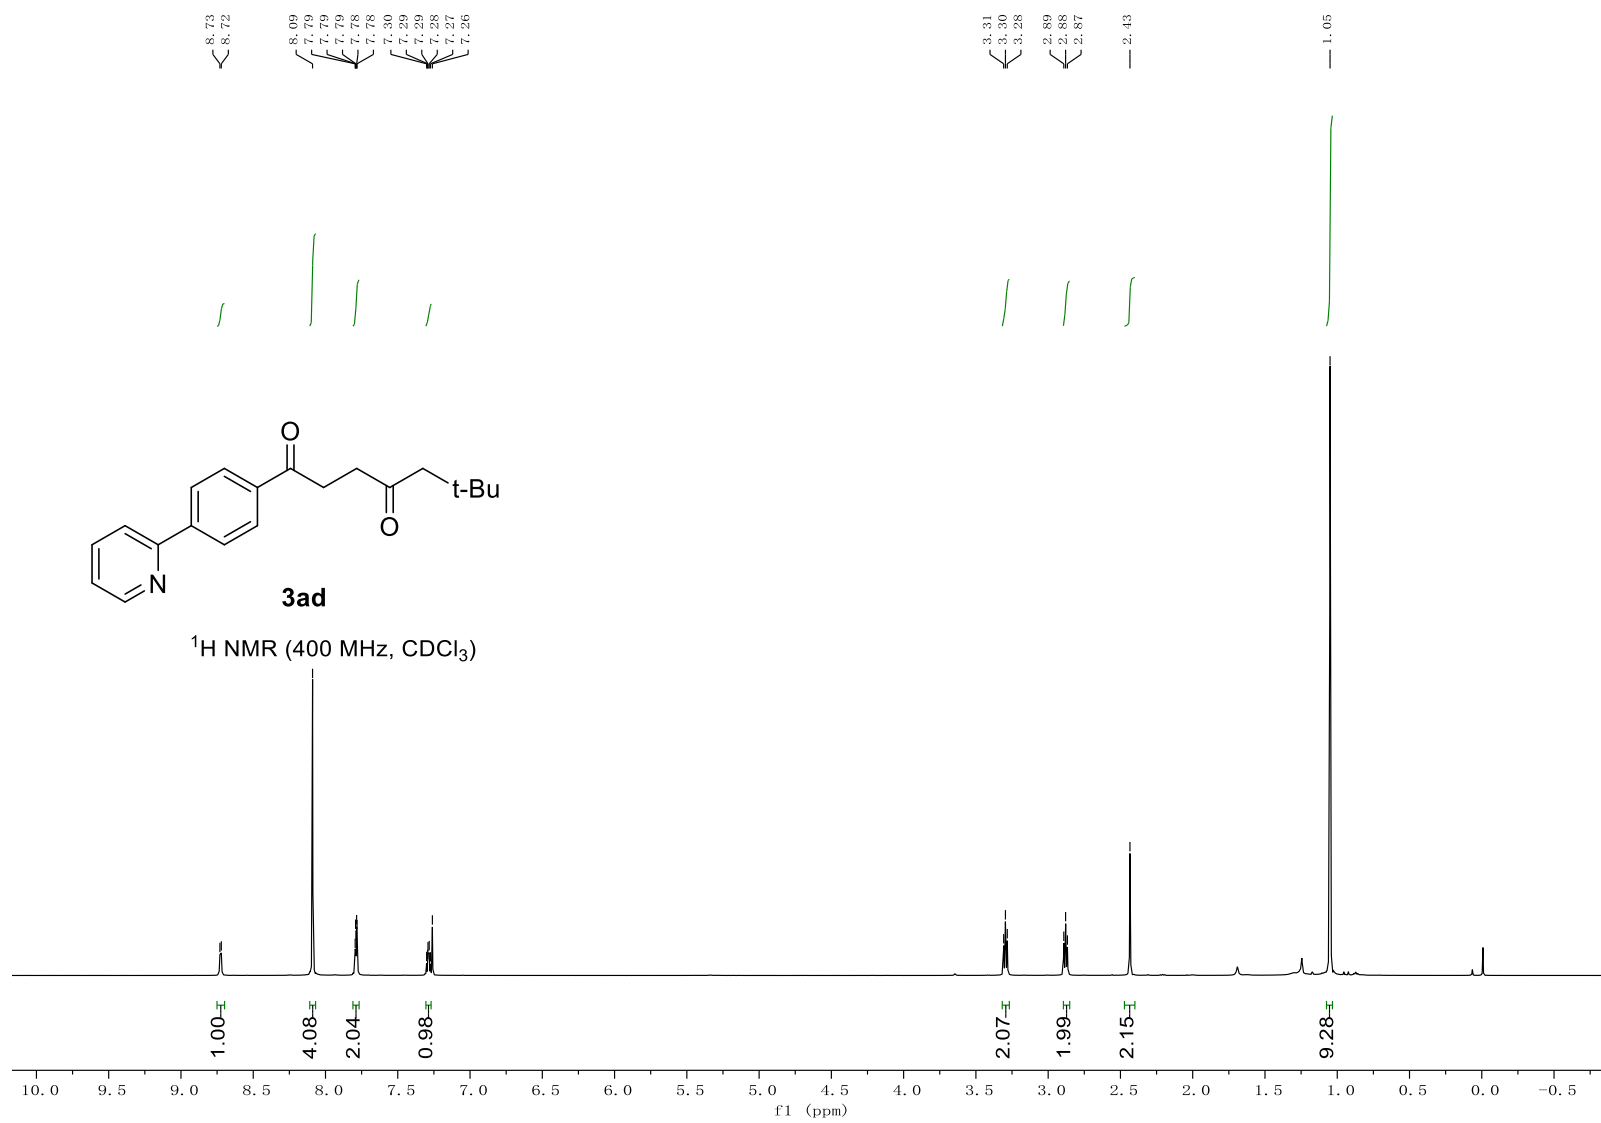

209.43  
 198.49  
 156.23  
 150.04  
 143.68  
 137.06  
 136.87  
 128.70  
 127.14  
 124.05  
 121.18  
 77.42  
 77.16  
 76.91  
 55.25  
 38.75  
 32.57  
 31.21  
 29.90

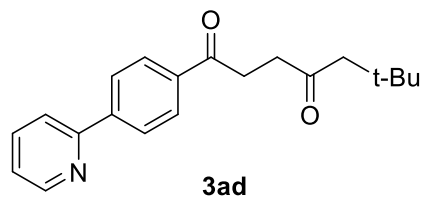

<sup>13</sup>C NMR (101 MHz, CDCl<sub>3</sub>)

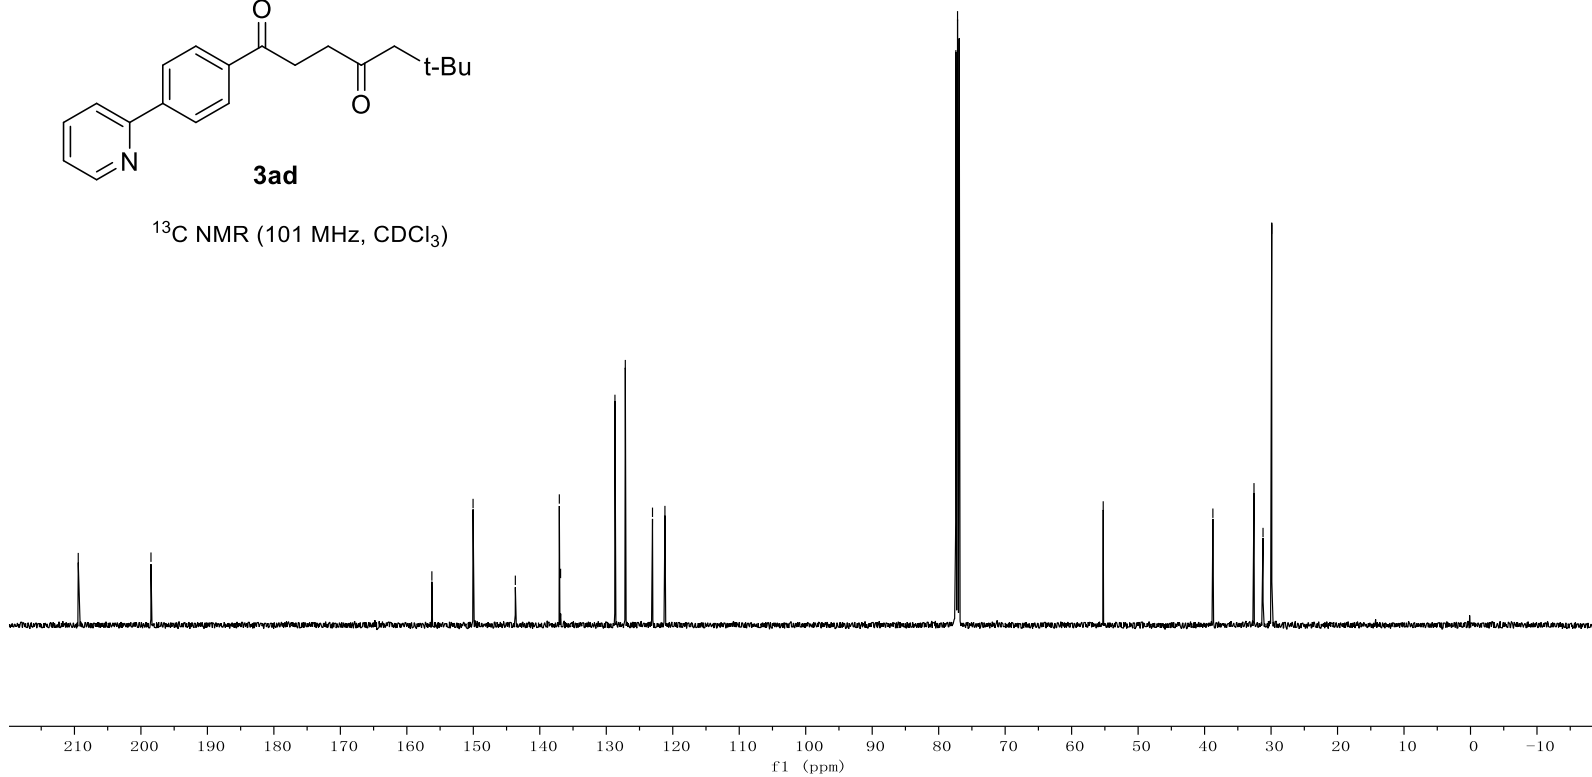

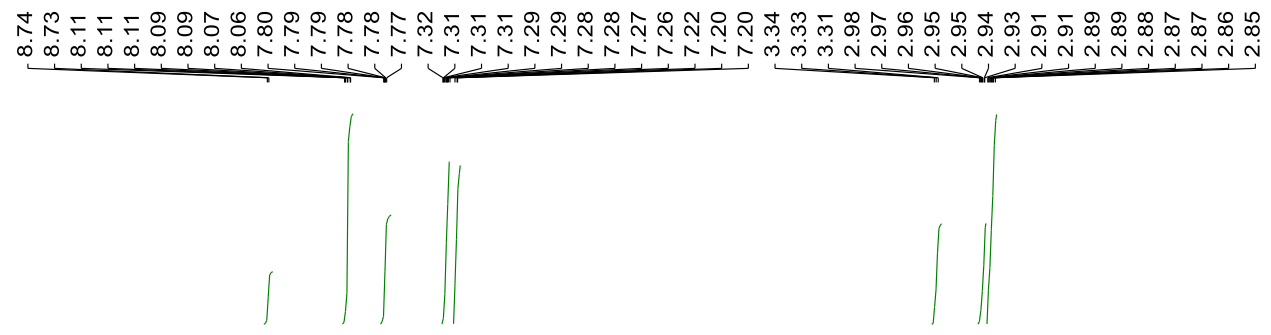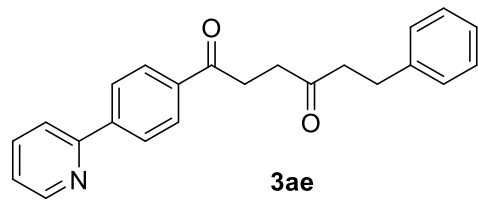

<sup>1</sup>H NMR (400 MHz, CDCl<sub>3</sub>)

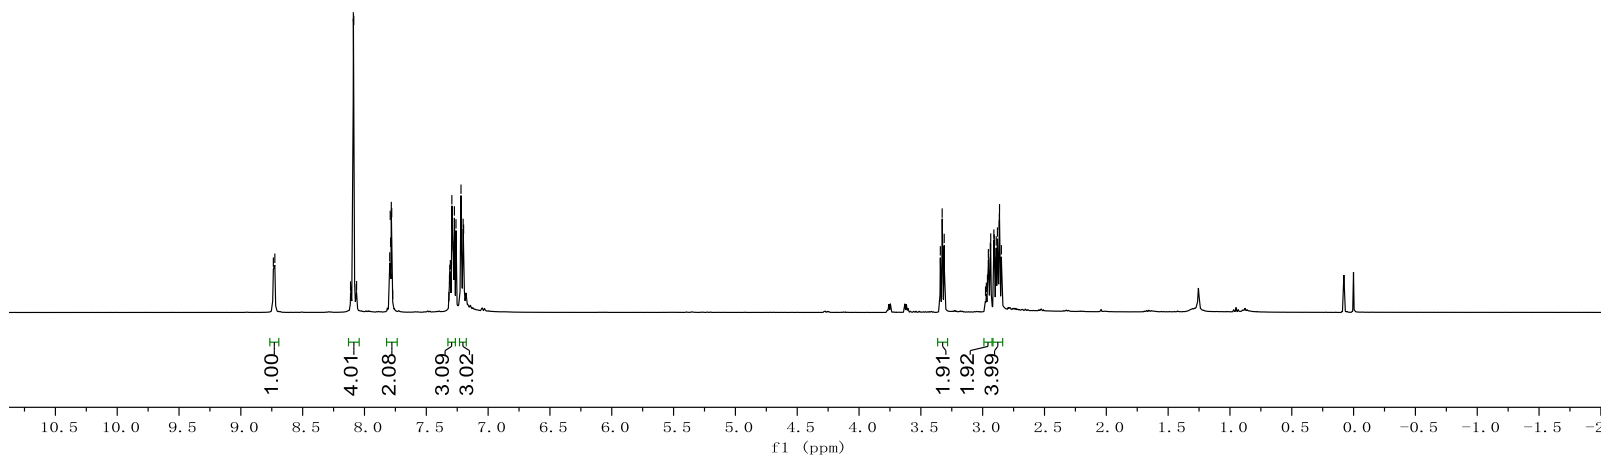

— 208.70  
— 198.34

— 156.17  
— 150.01  
— 143.73  
— 141.16  
— 137.06  
— 136.73  
— 128.67  
— 128.60  
— 128.44  
— 127.15  
— 126.20  
— 123.05  
— 121.17

— 77.48  
— 77.16  
— 76.84

— 44.57  
— 36.50  
— 32.66  
— 29.88

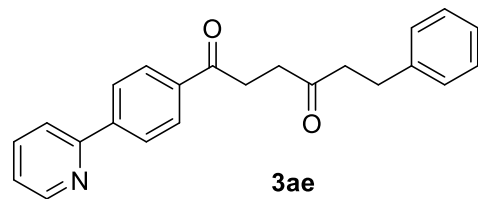

<sup>13</sup>C NMR (101 MHz, CDCl<sub>3</sub>)

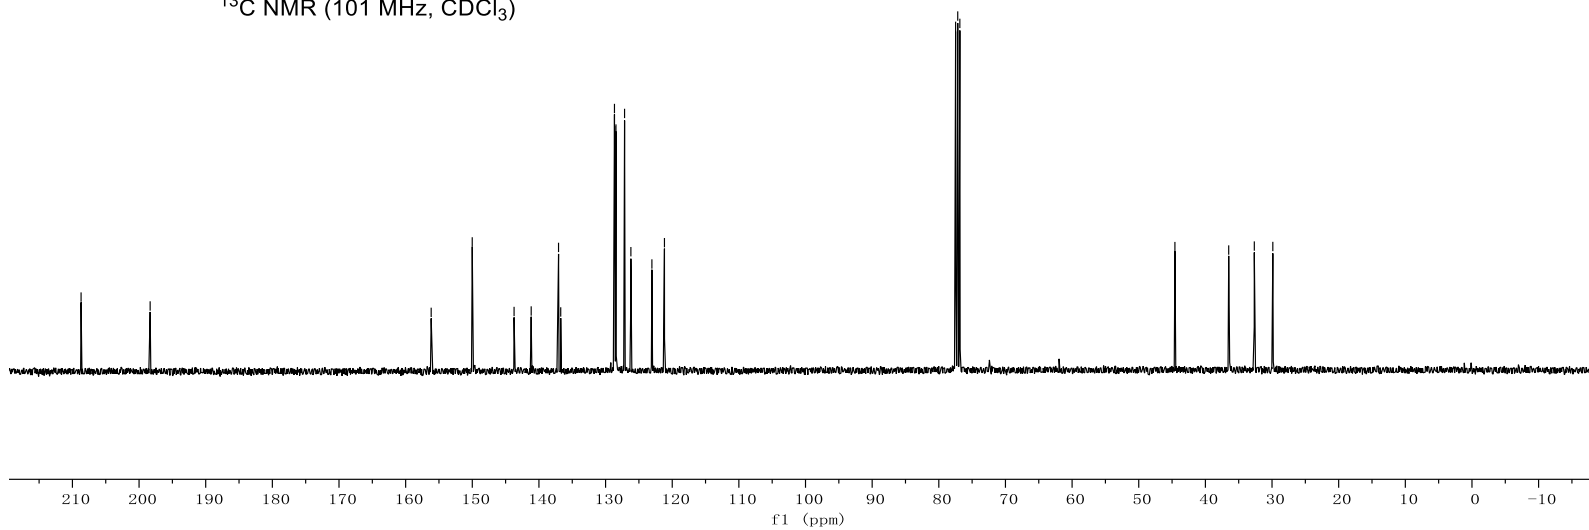

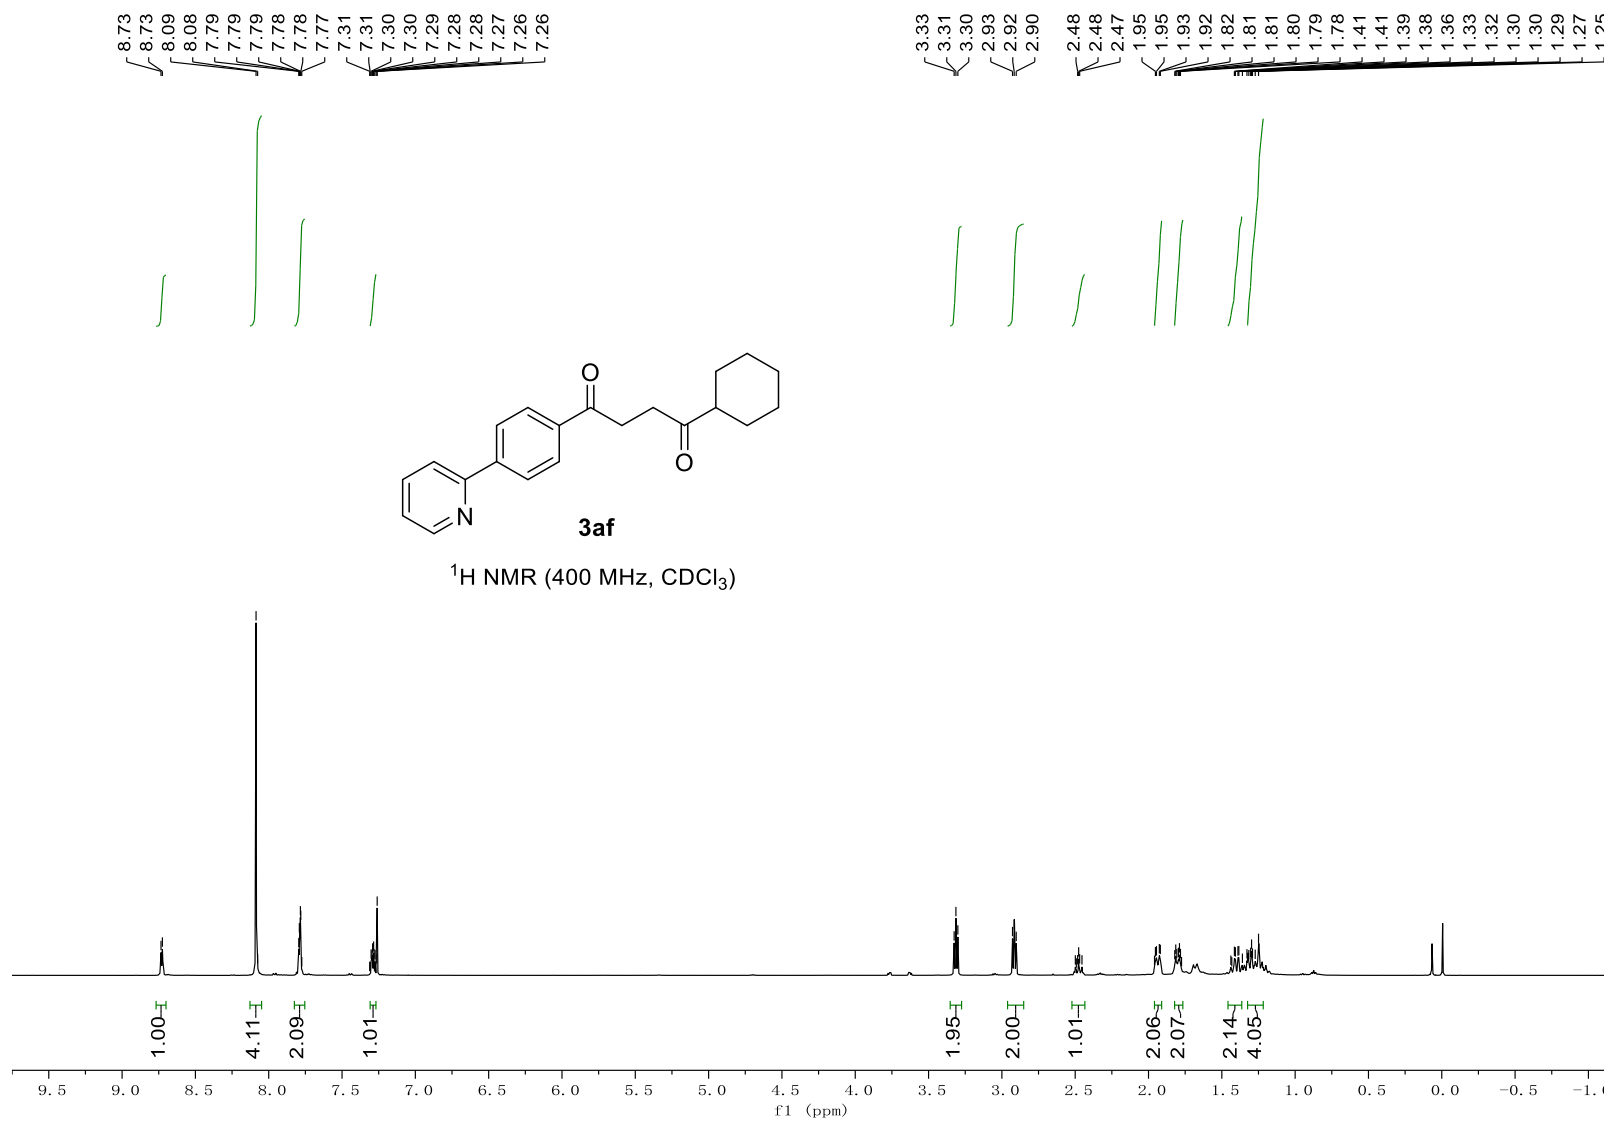



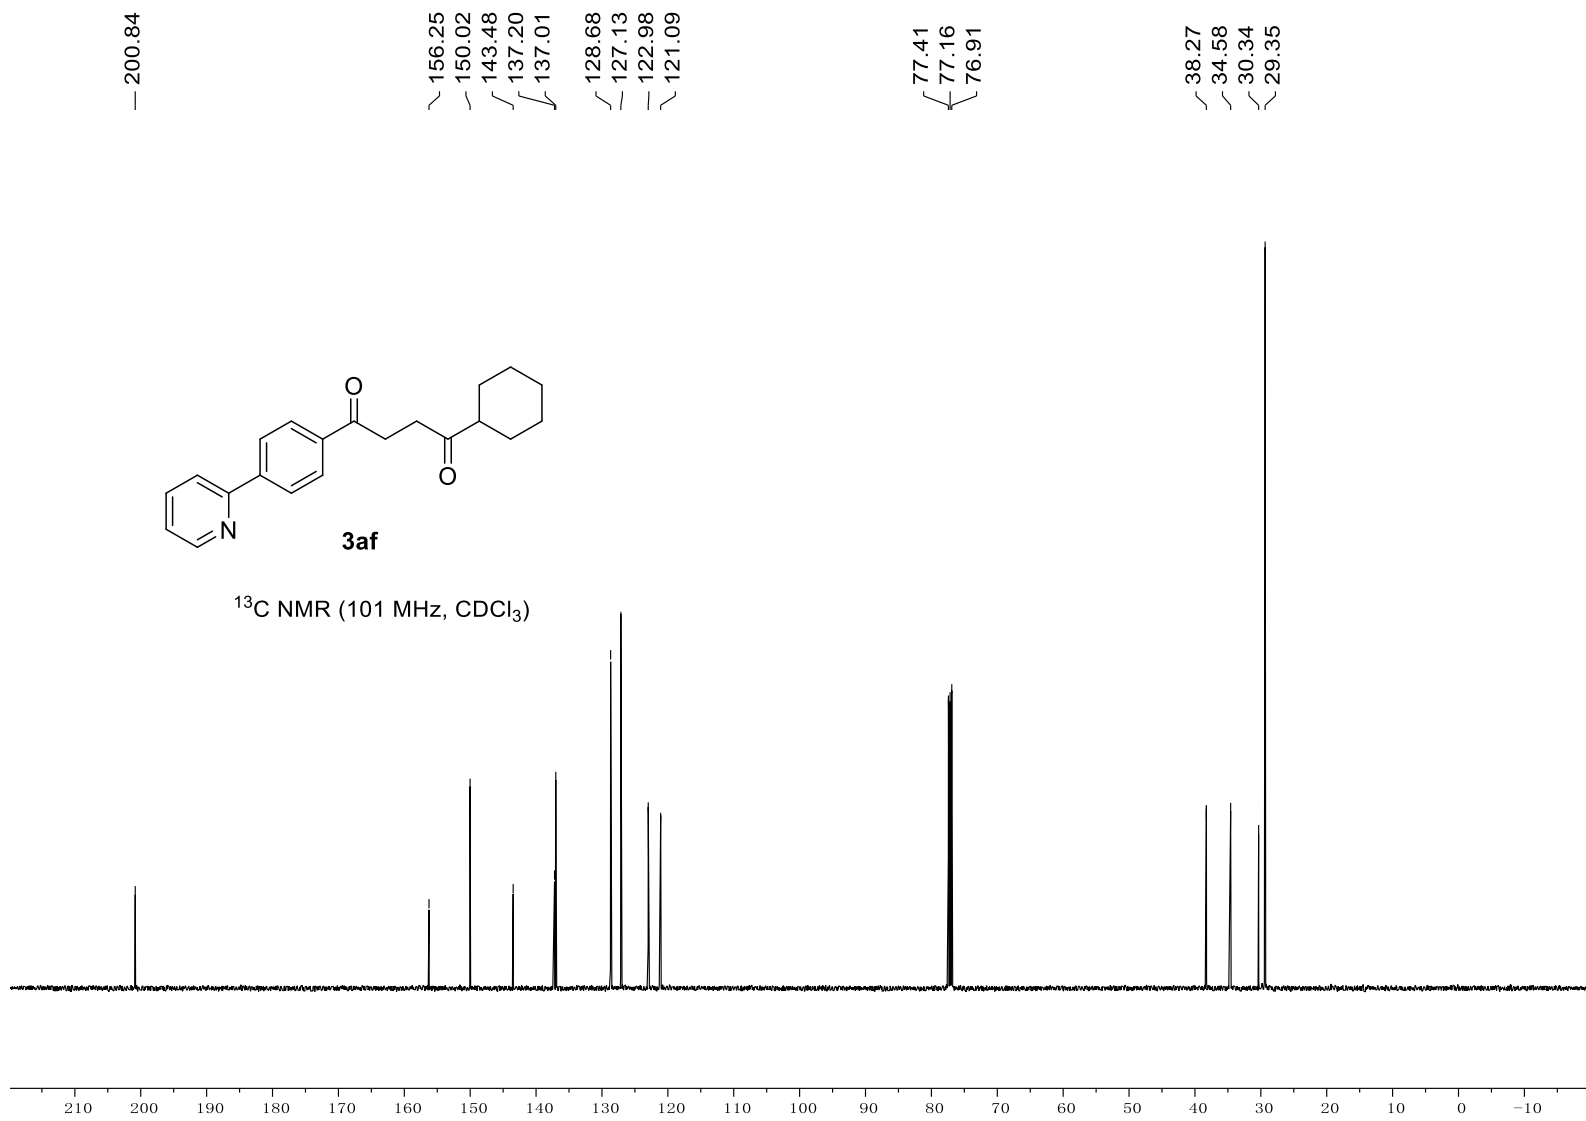

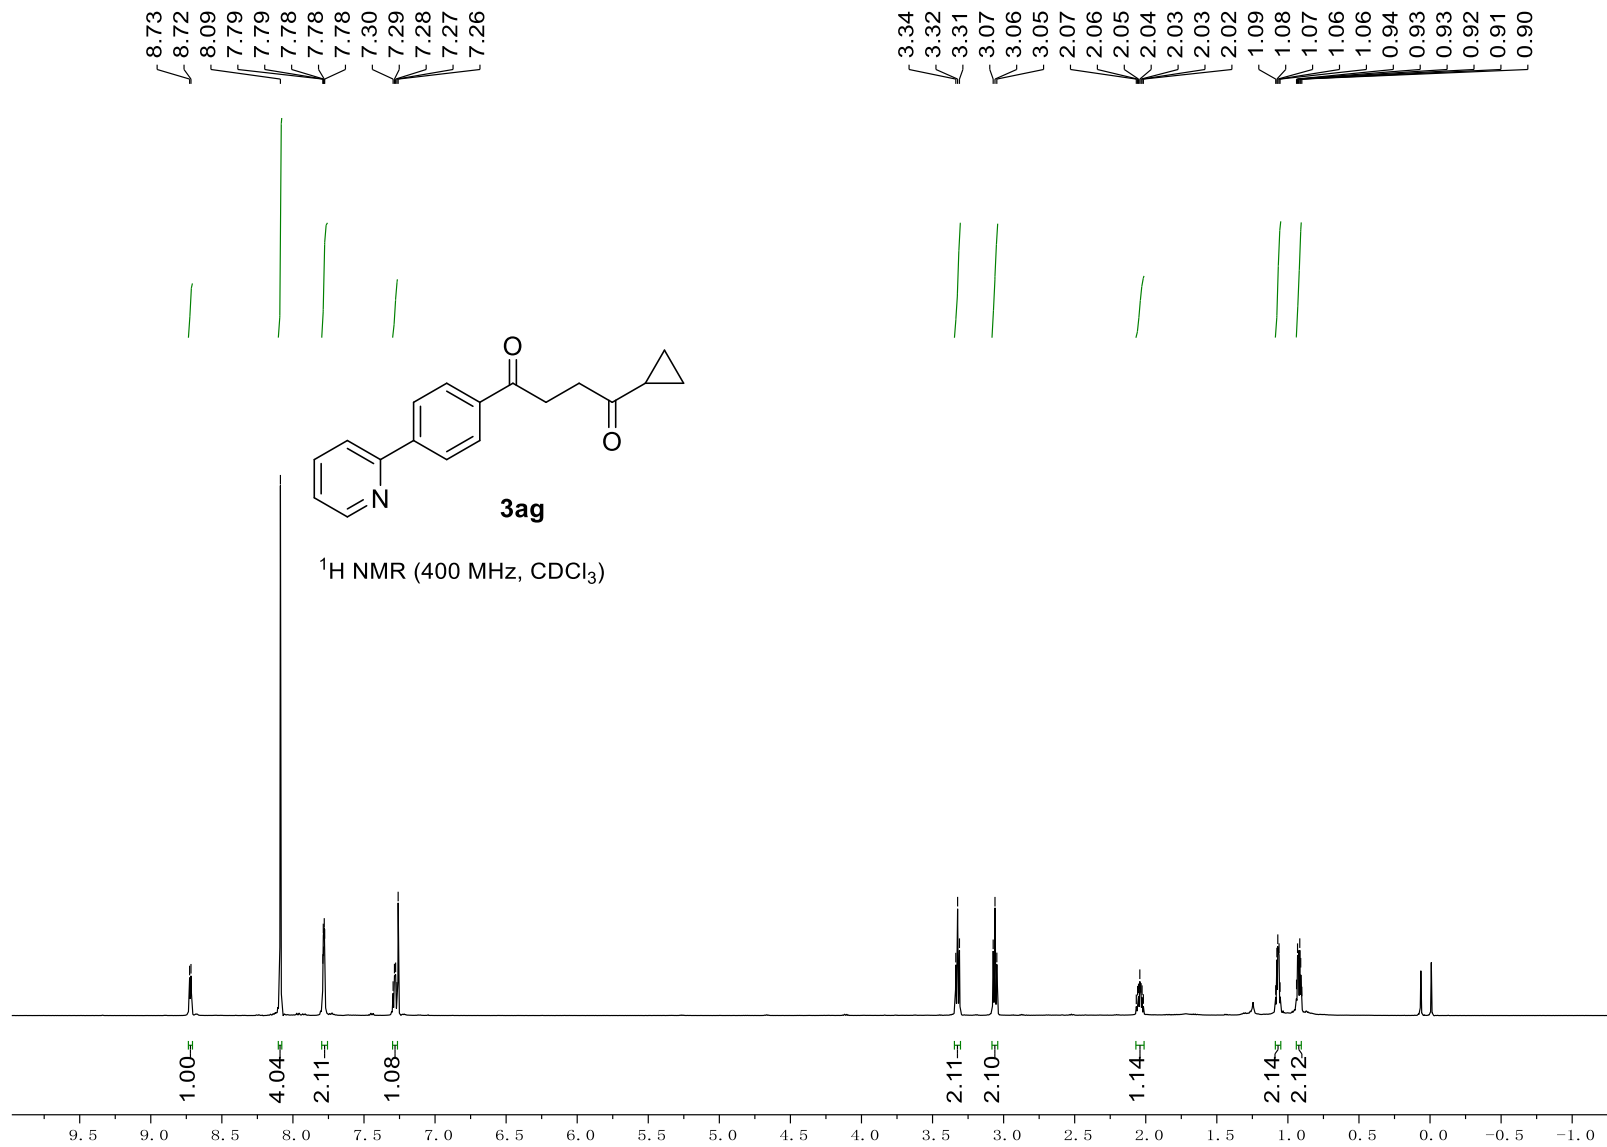

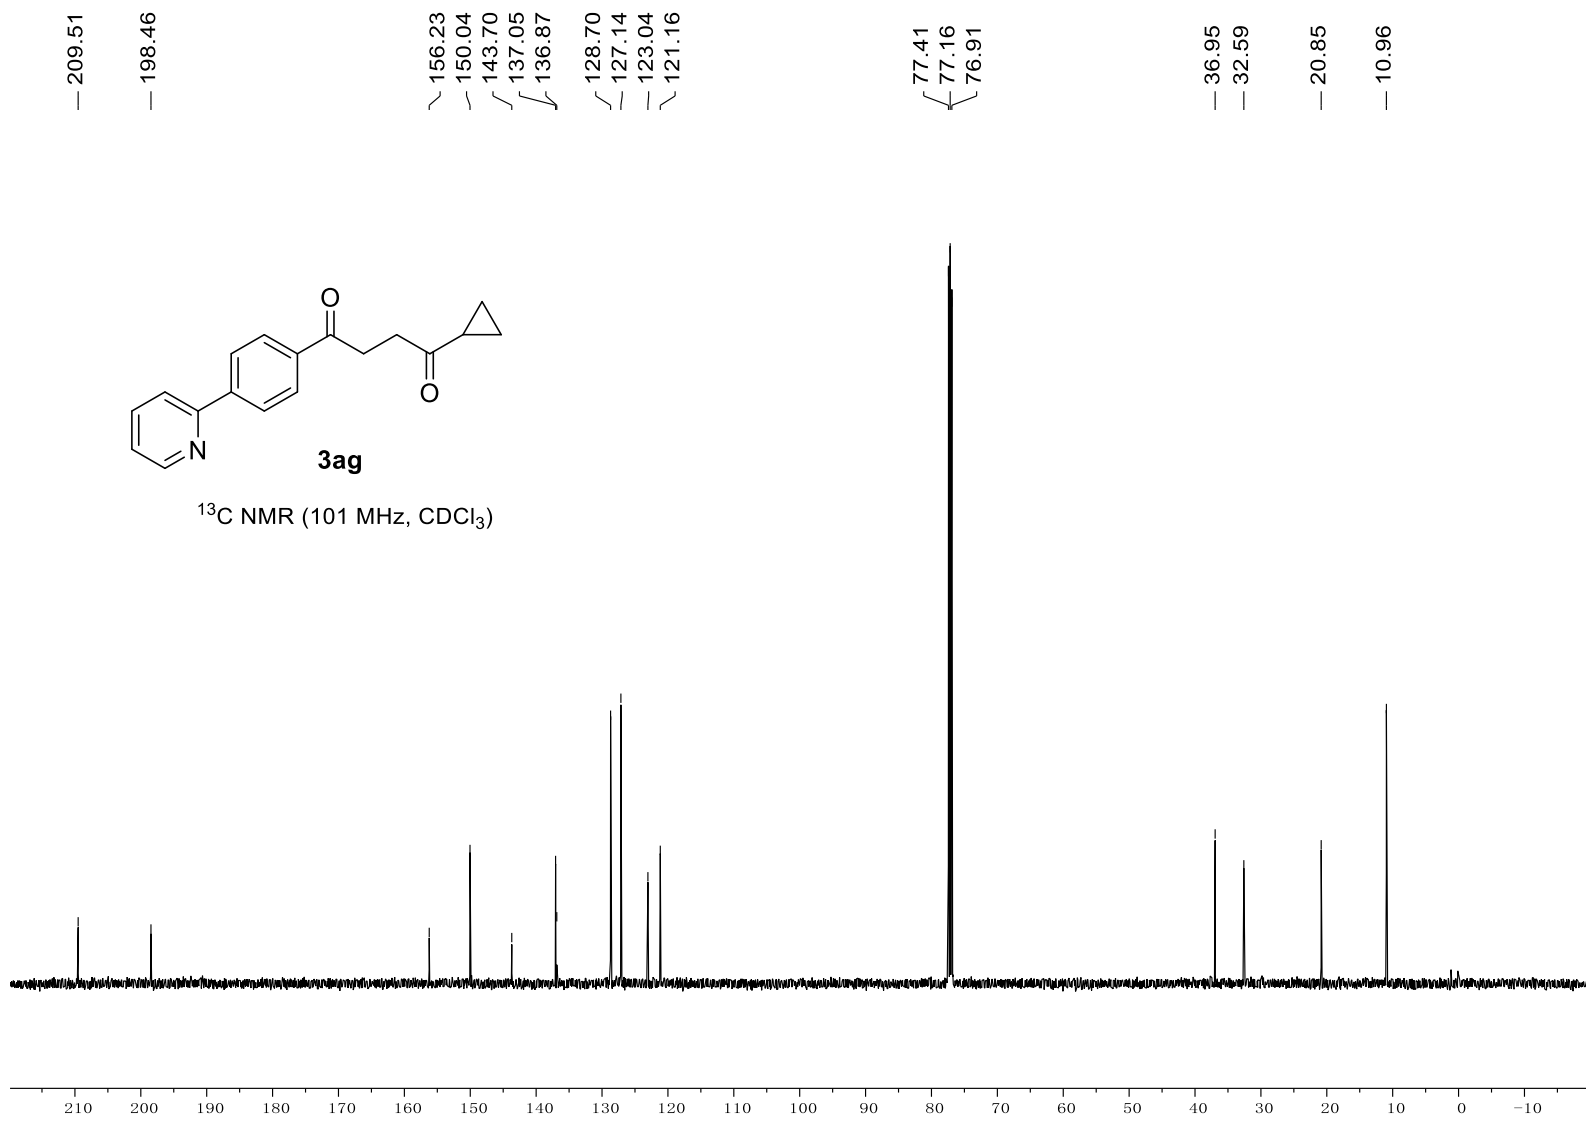

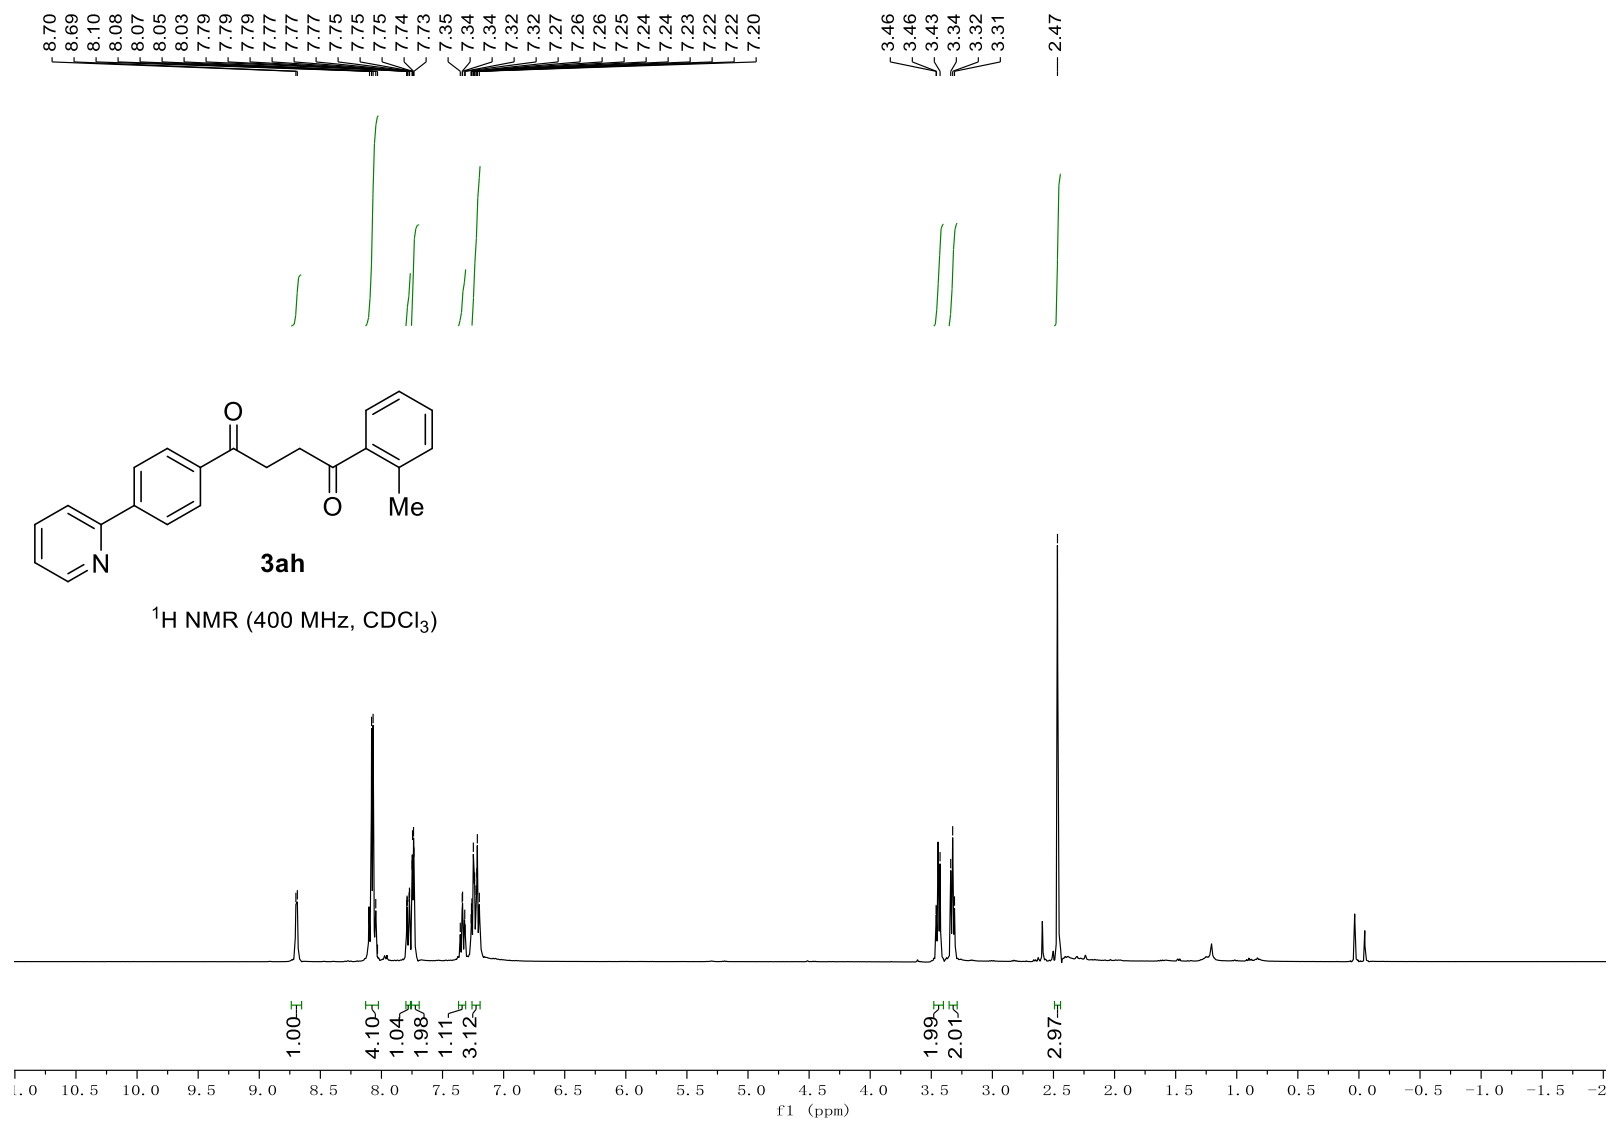

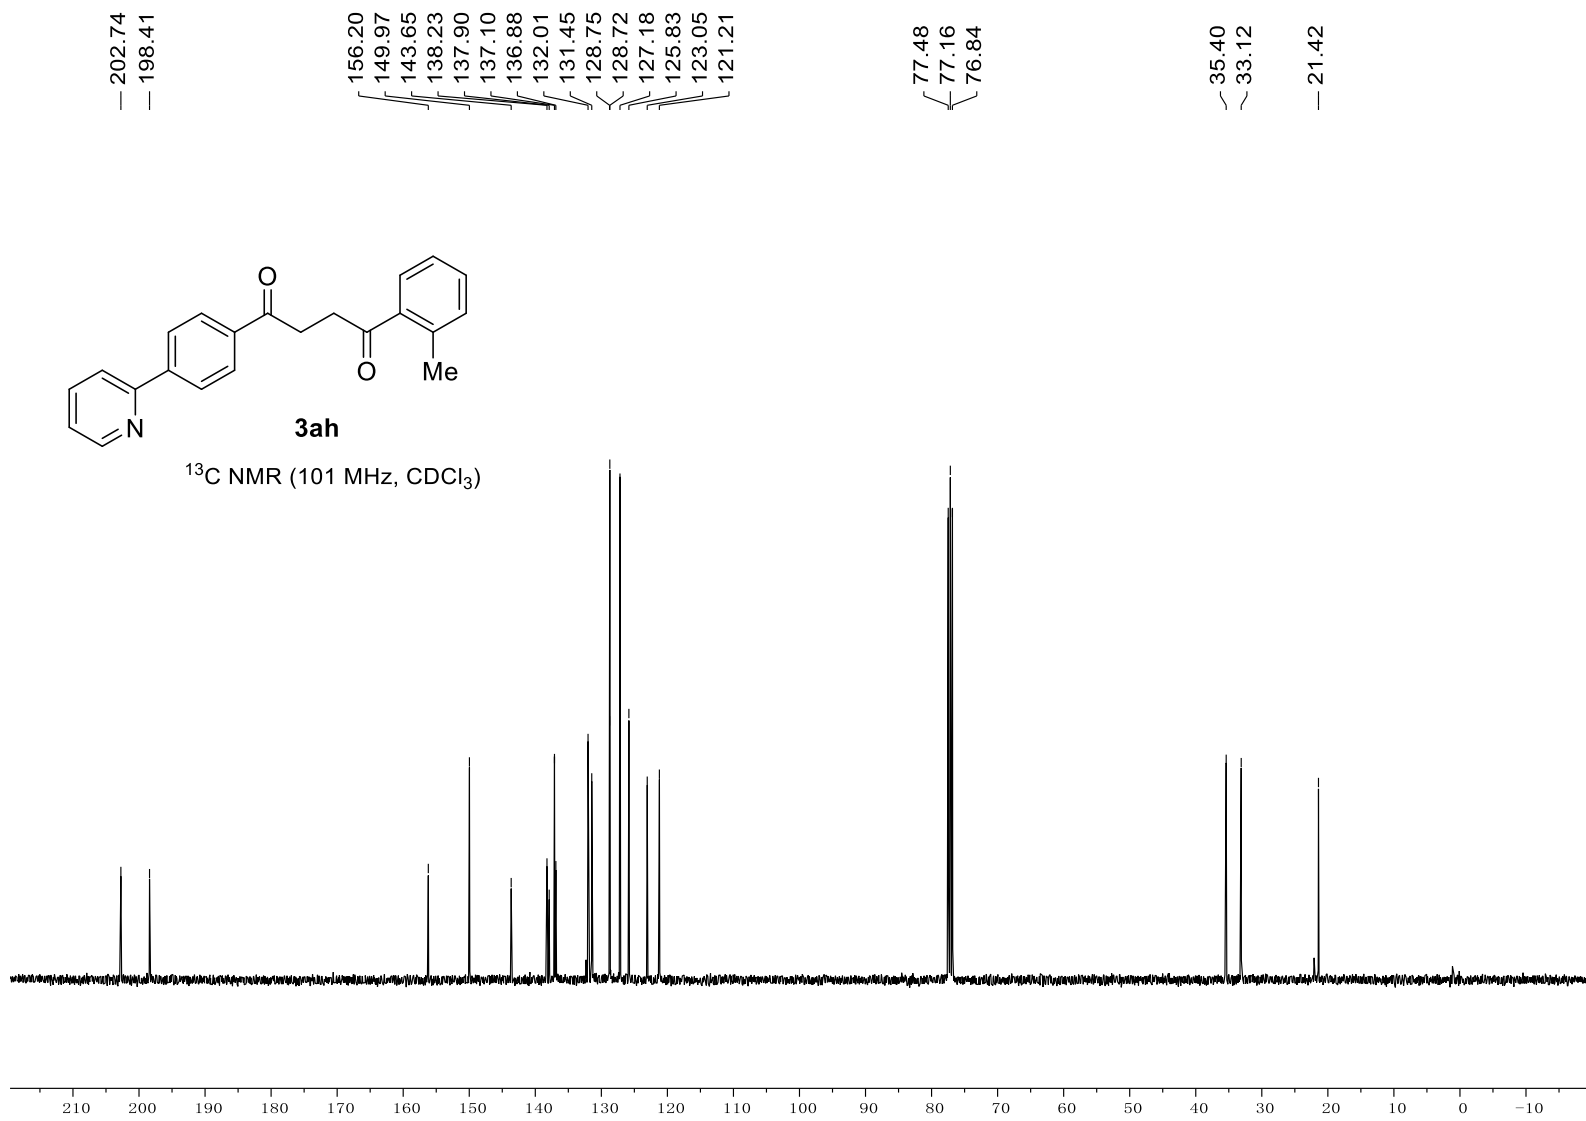

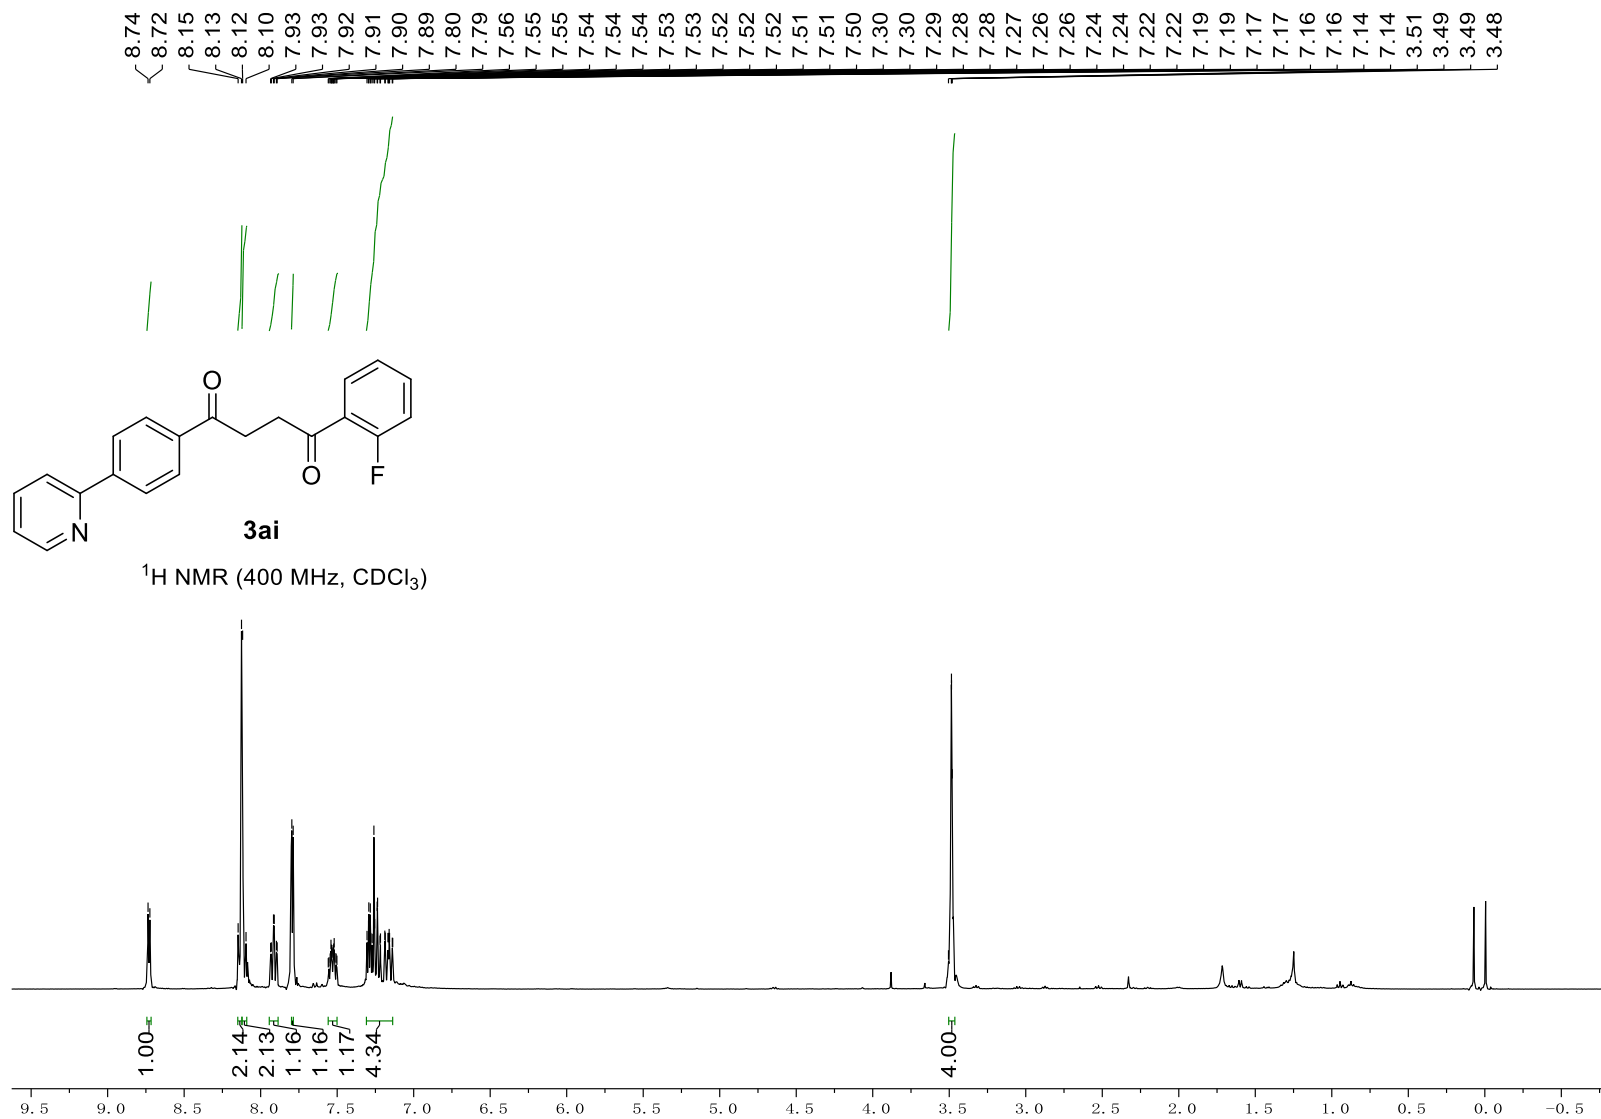

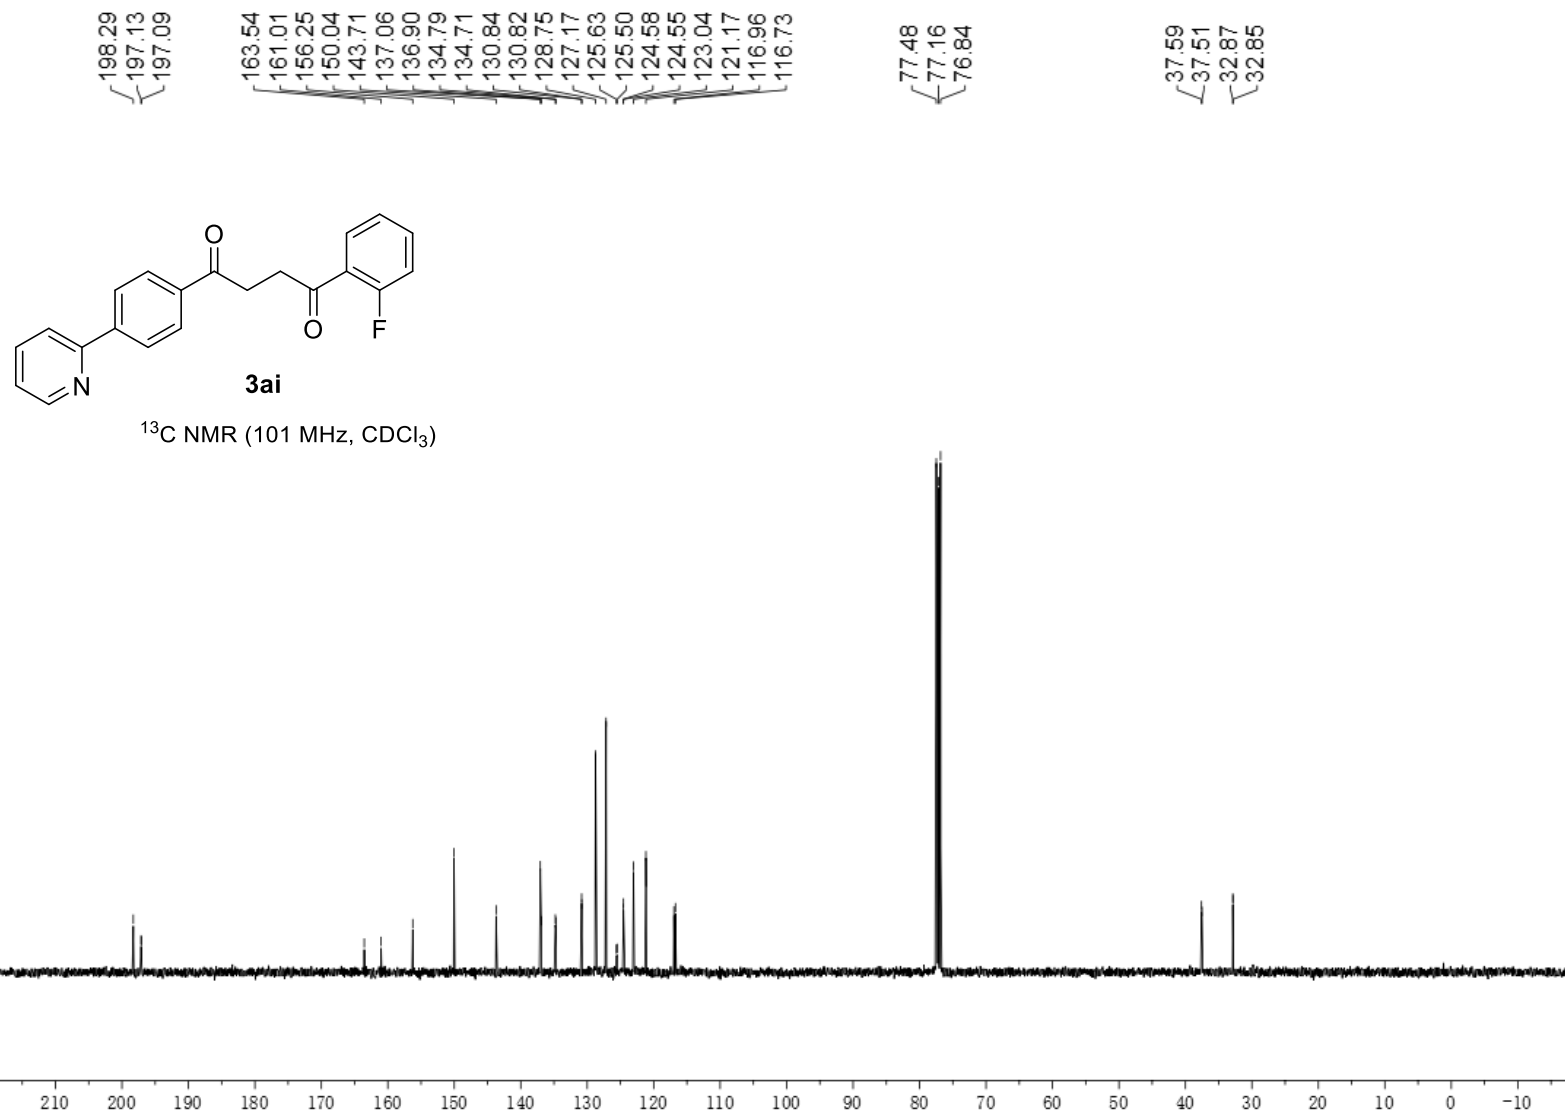

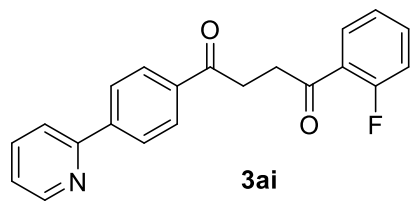

<sup>19</sup>F NMR (376 MHz, CDCl<sub>3</sub>)

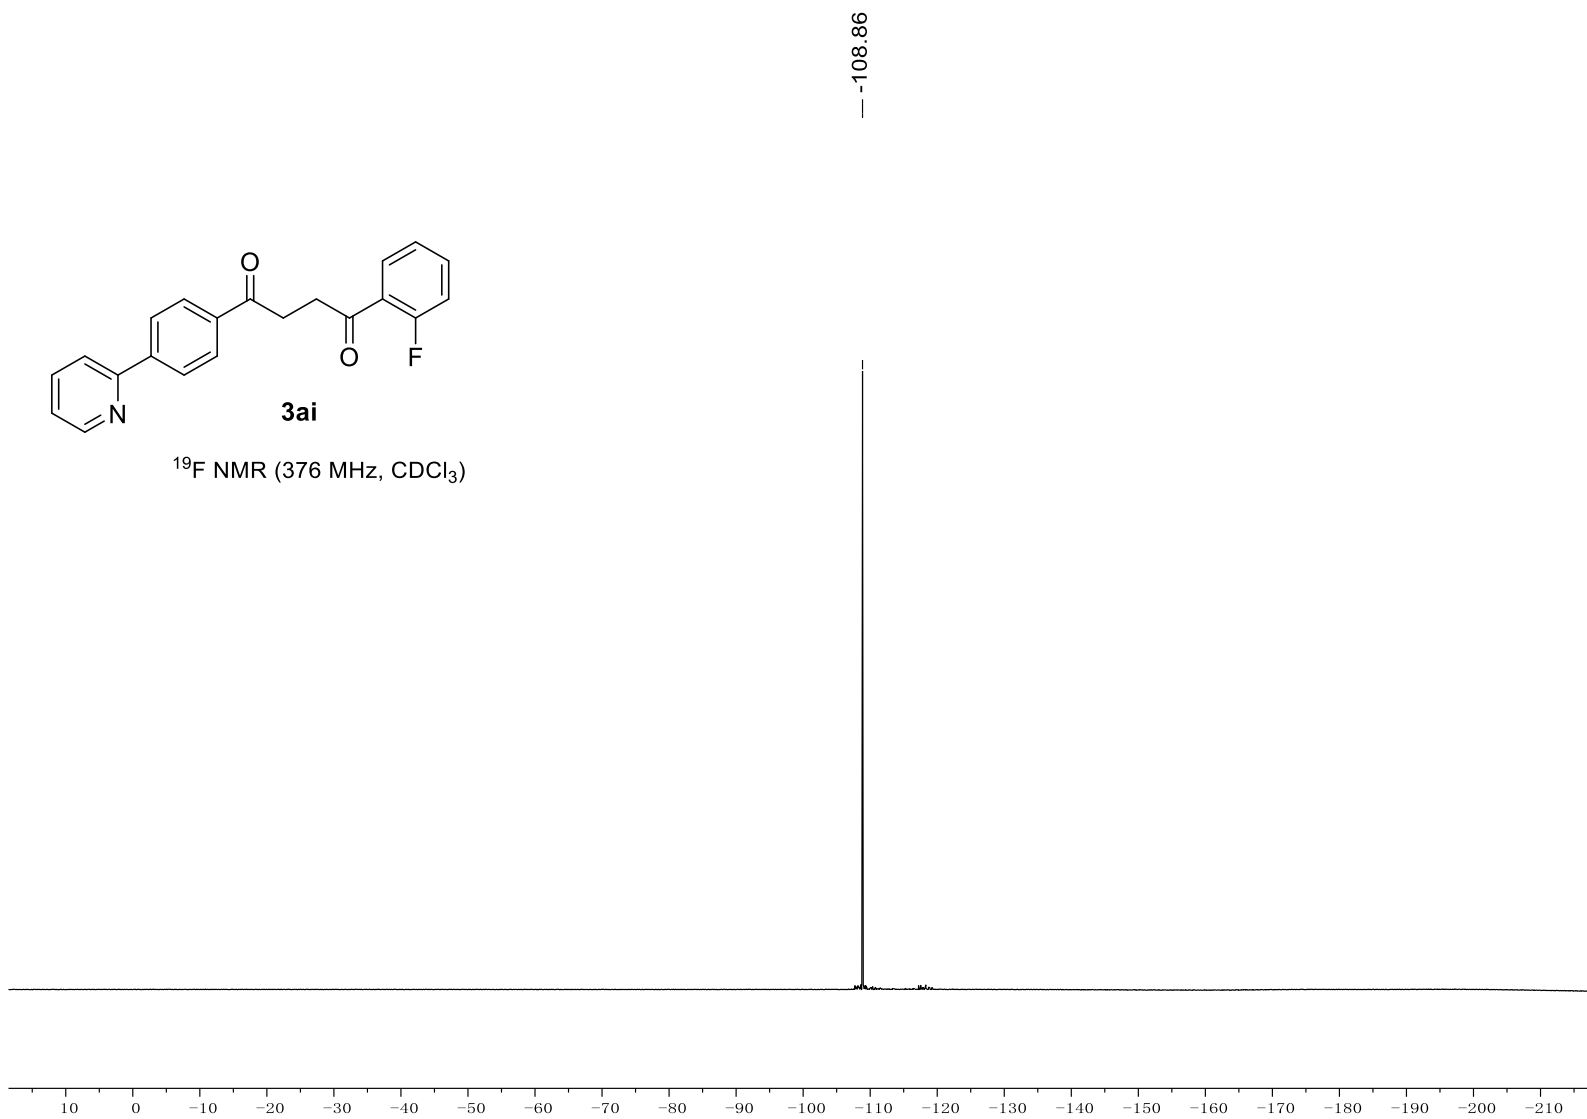



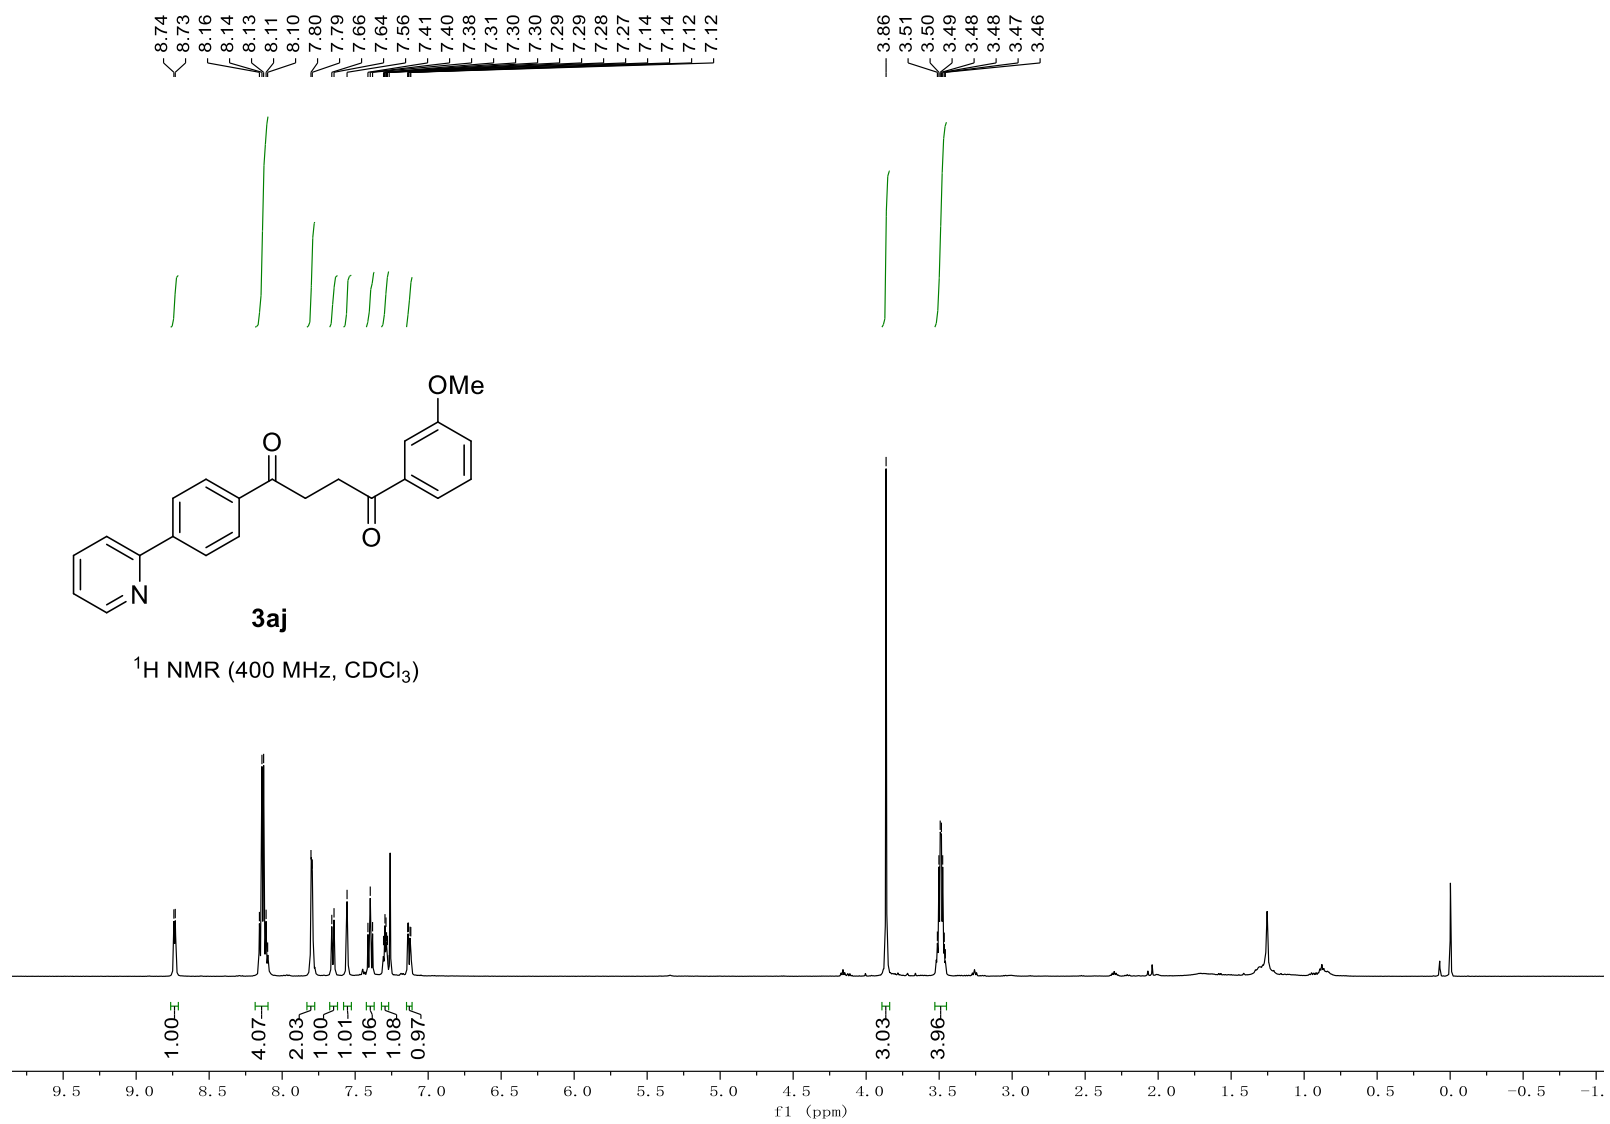

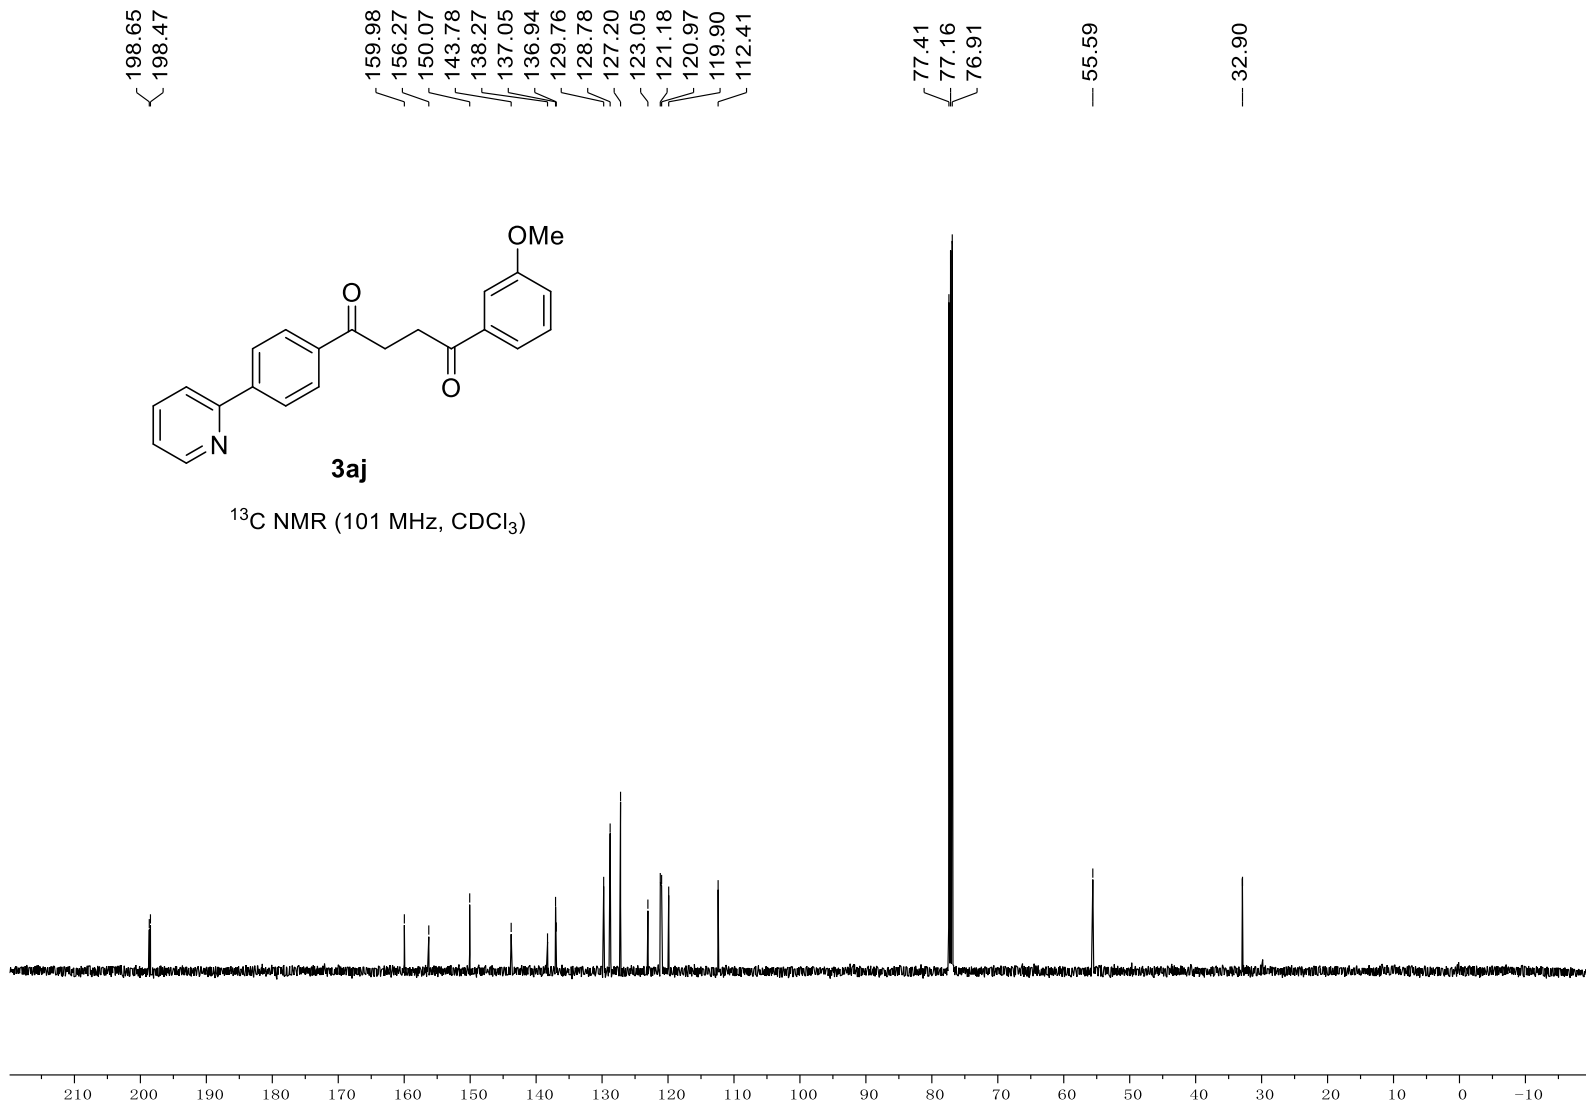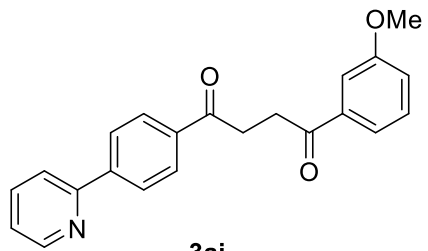

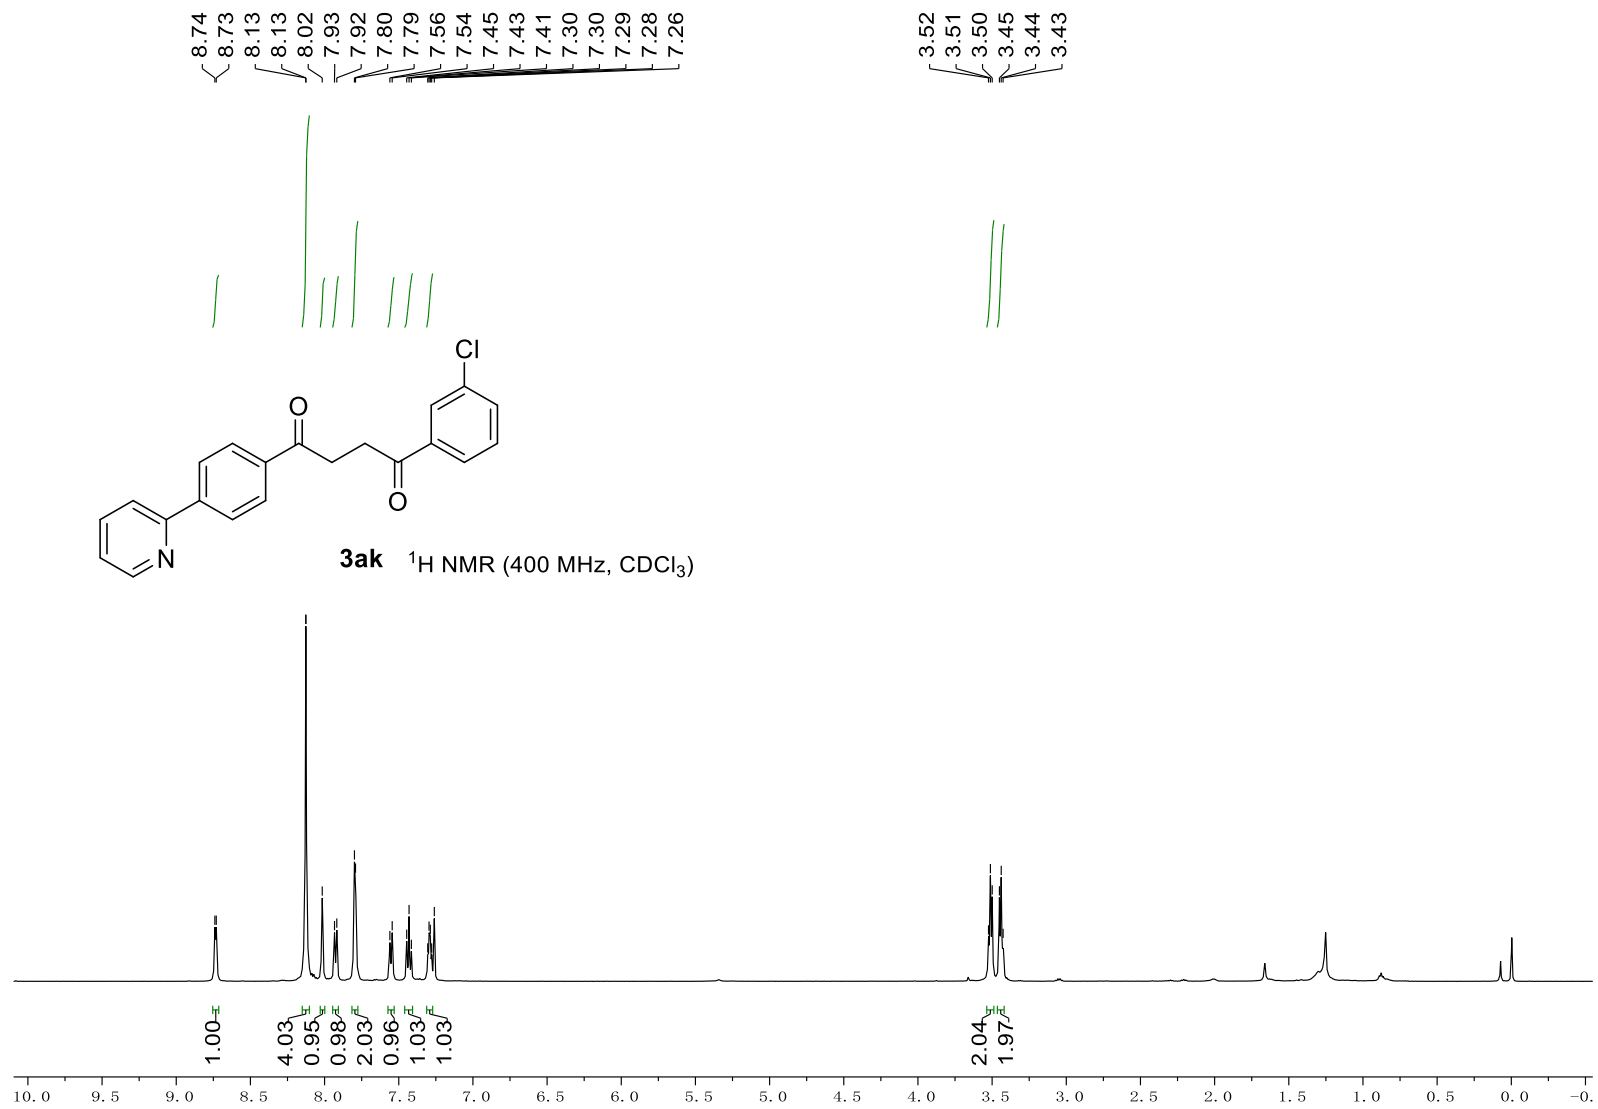

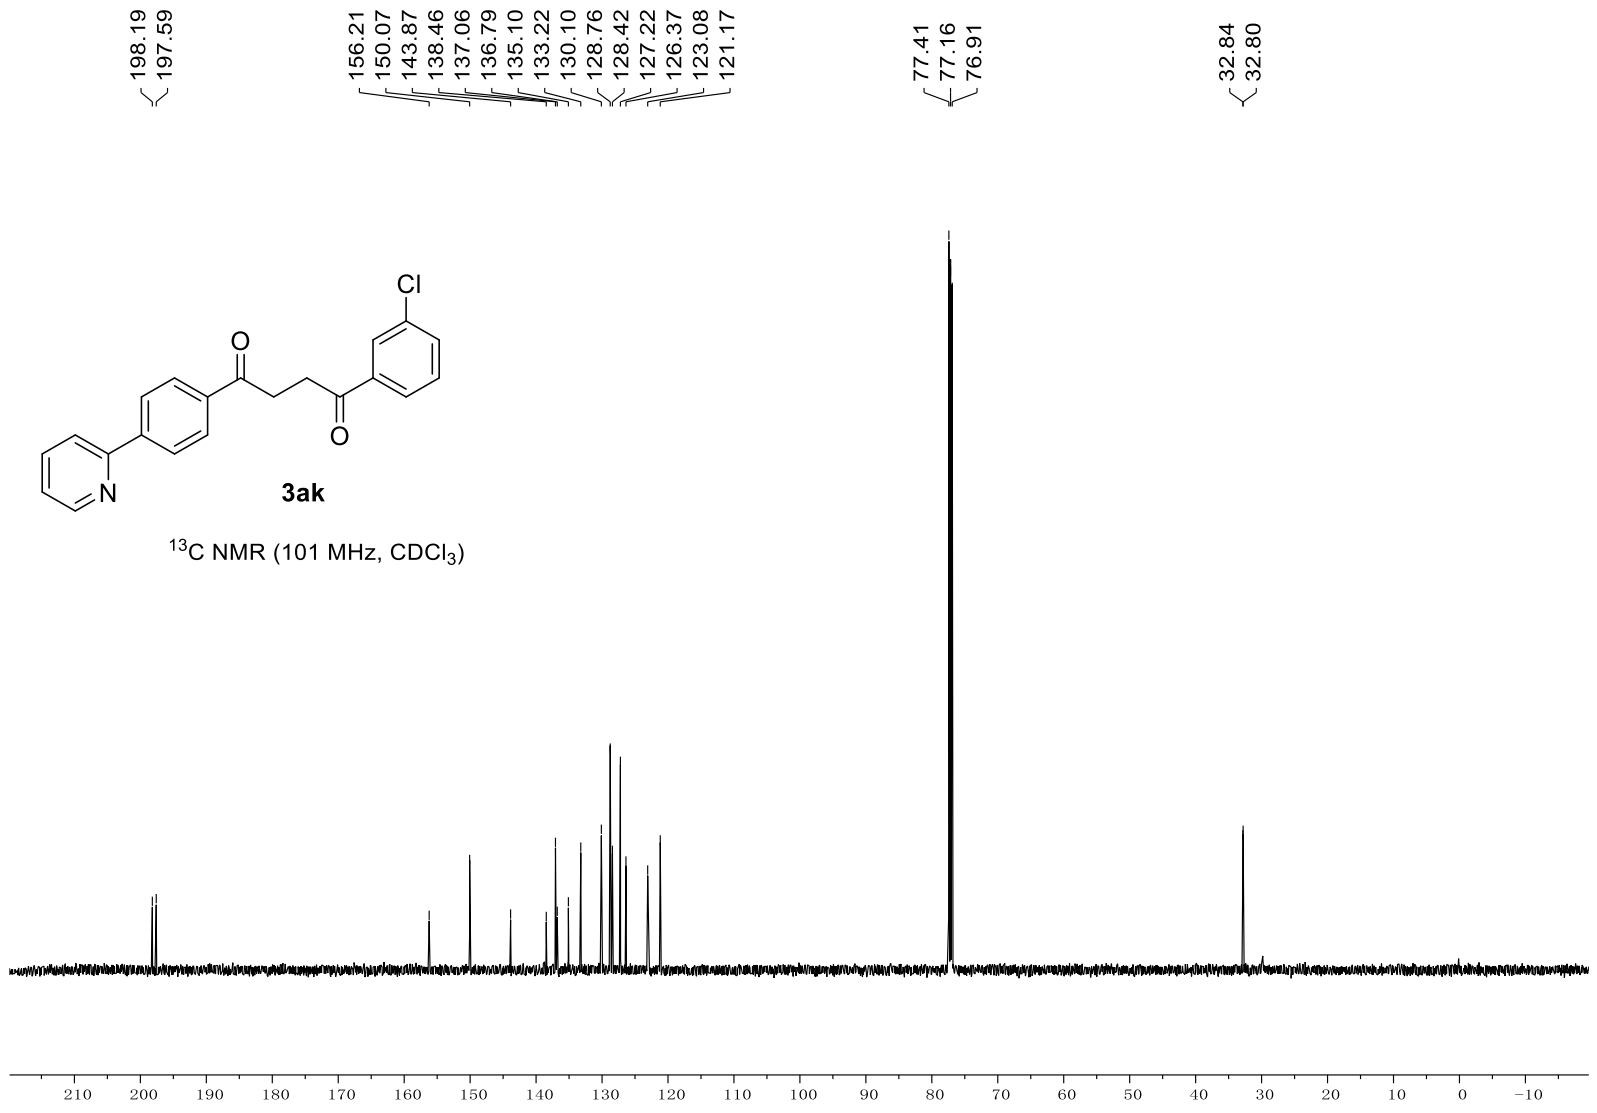

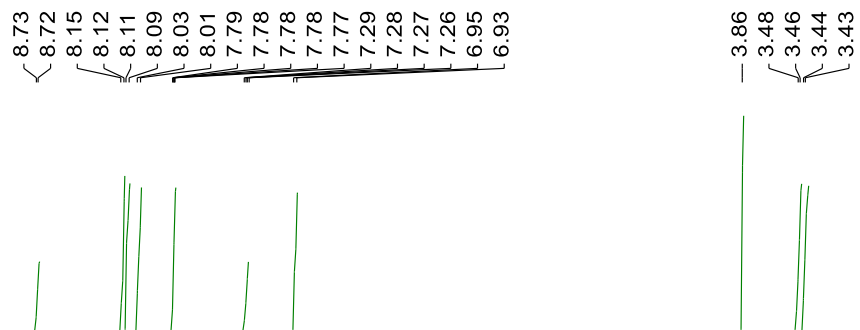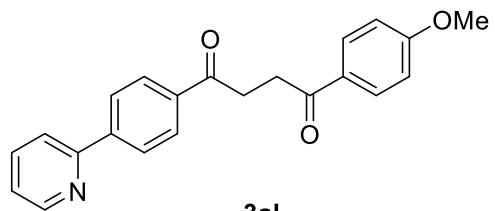

**3al**

<sup>1</sup>H NMR (400 MHz, CDCl<sub>3</sub>)

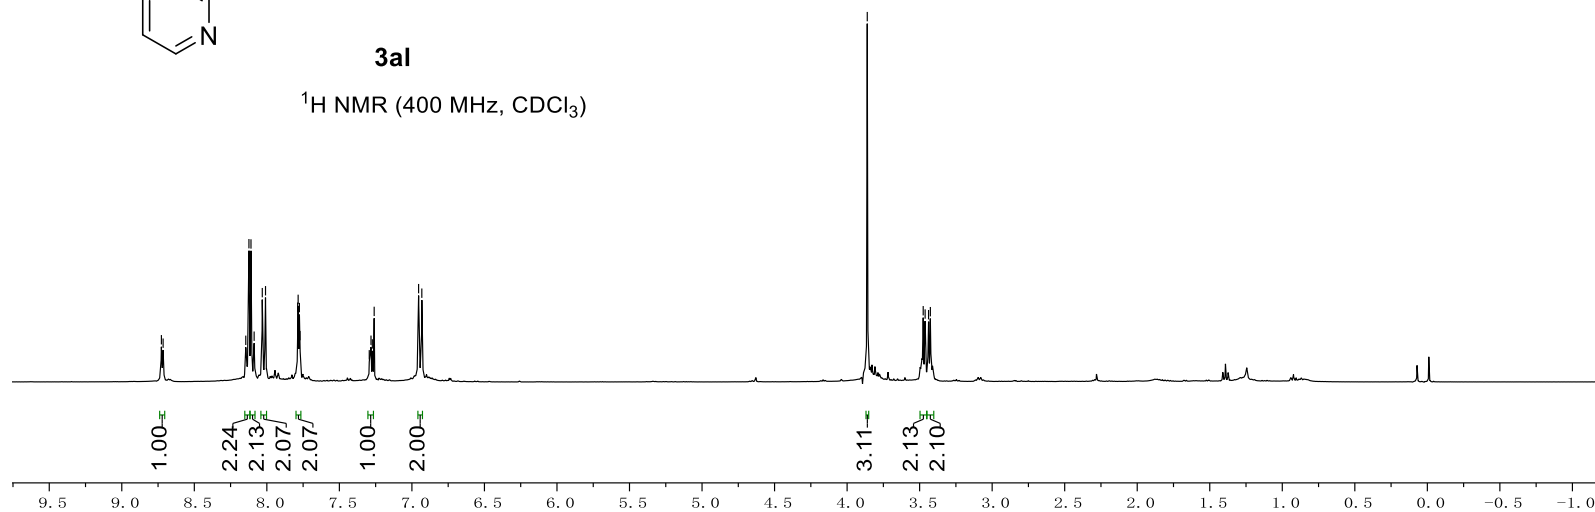

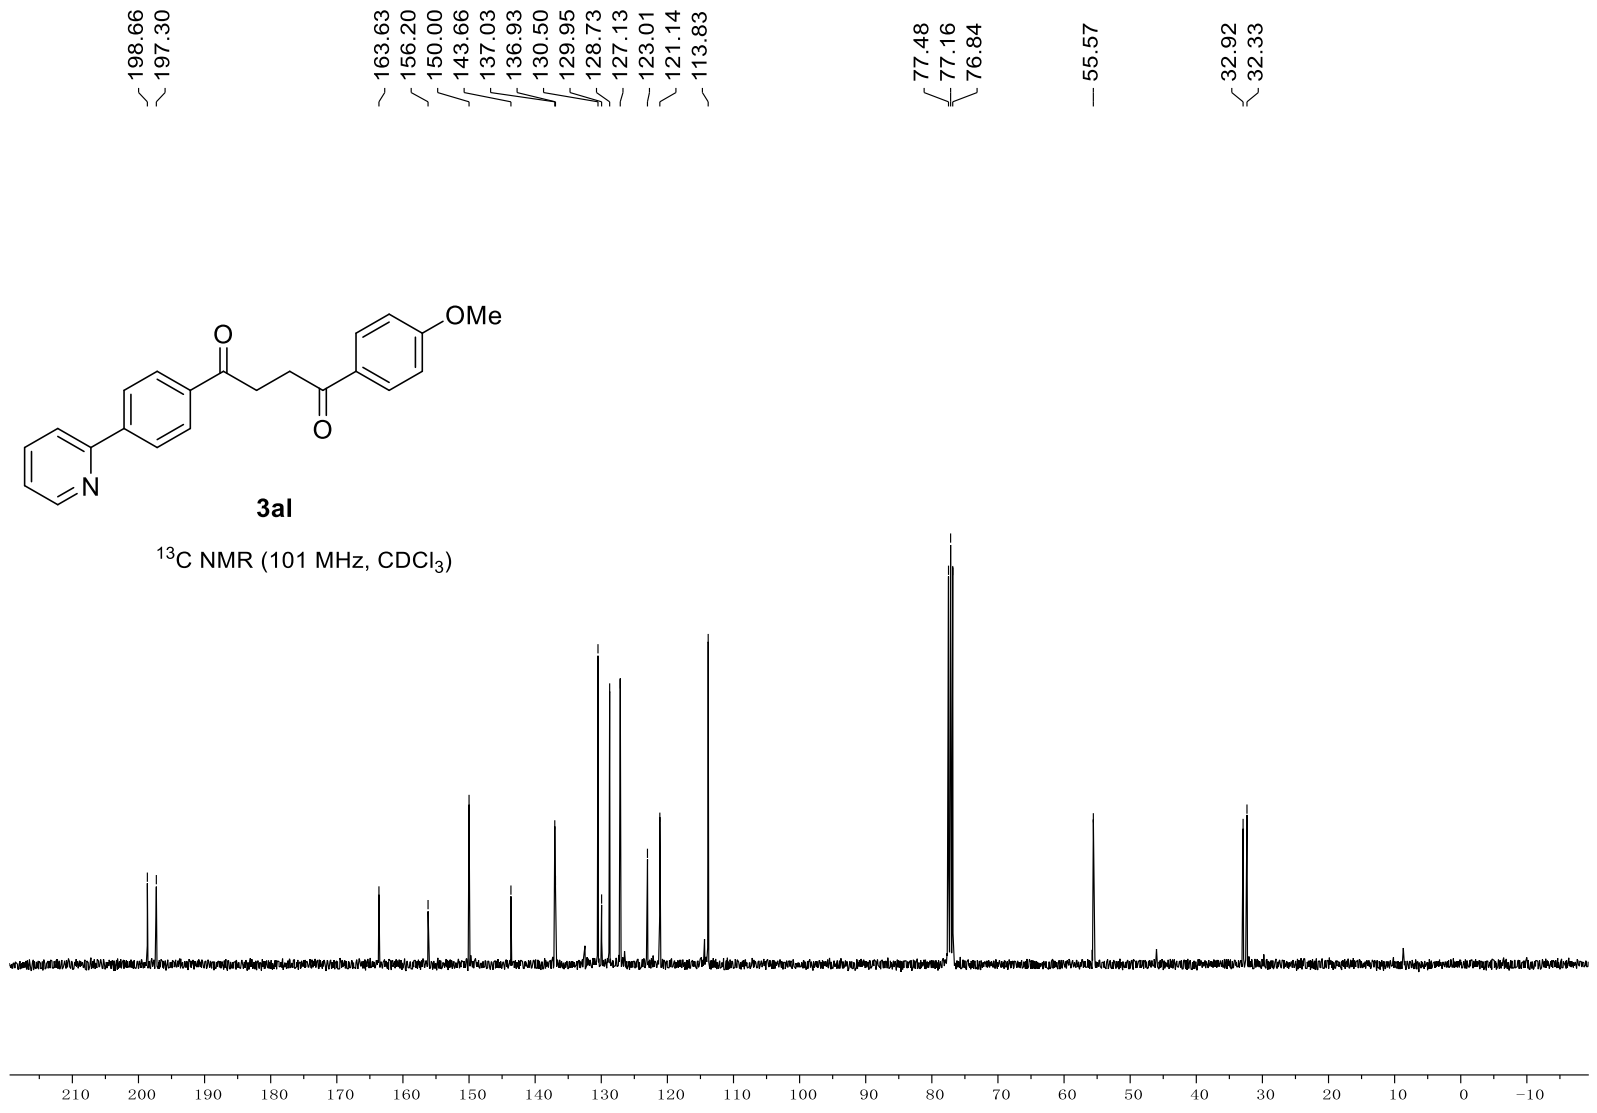

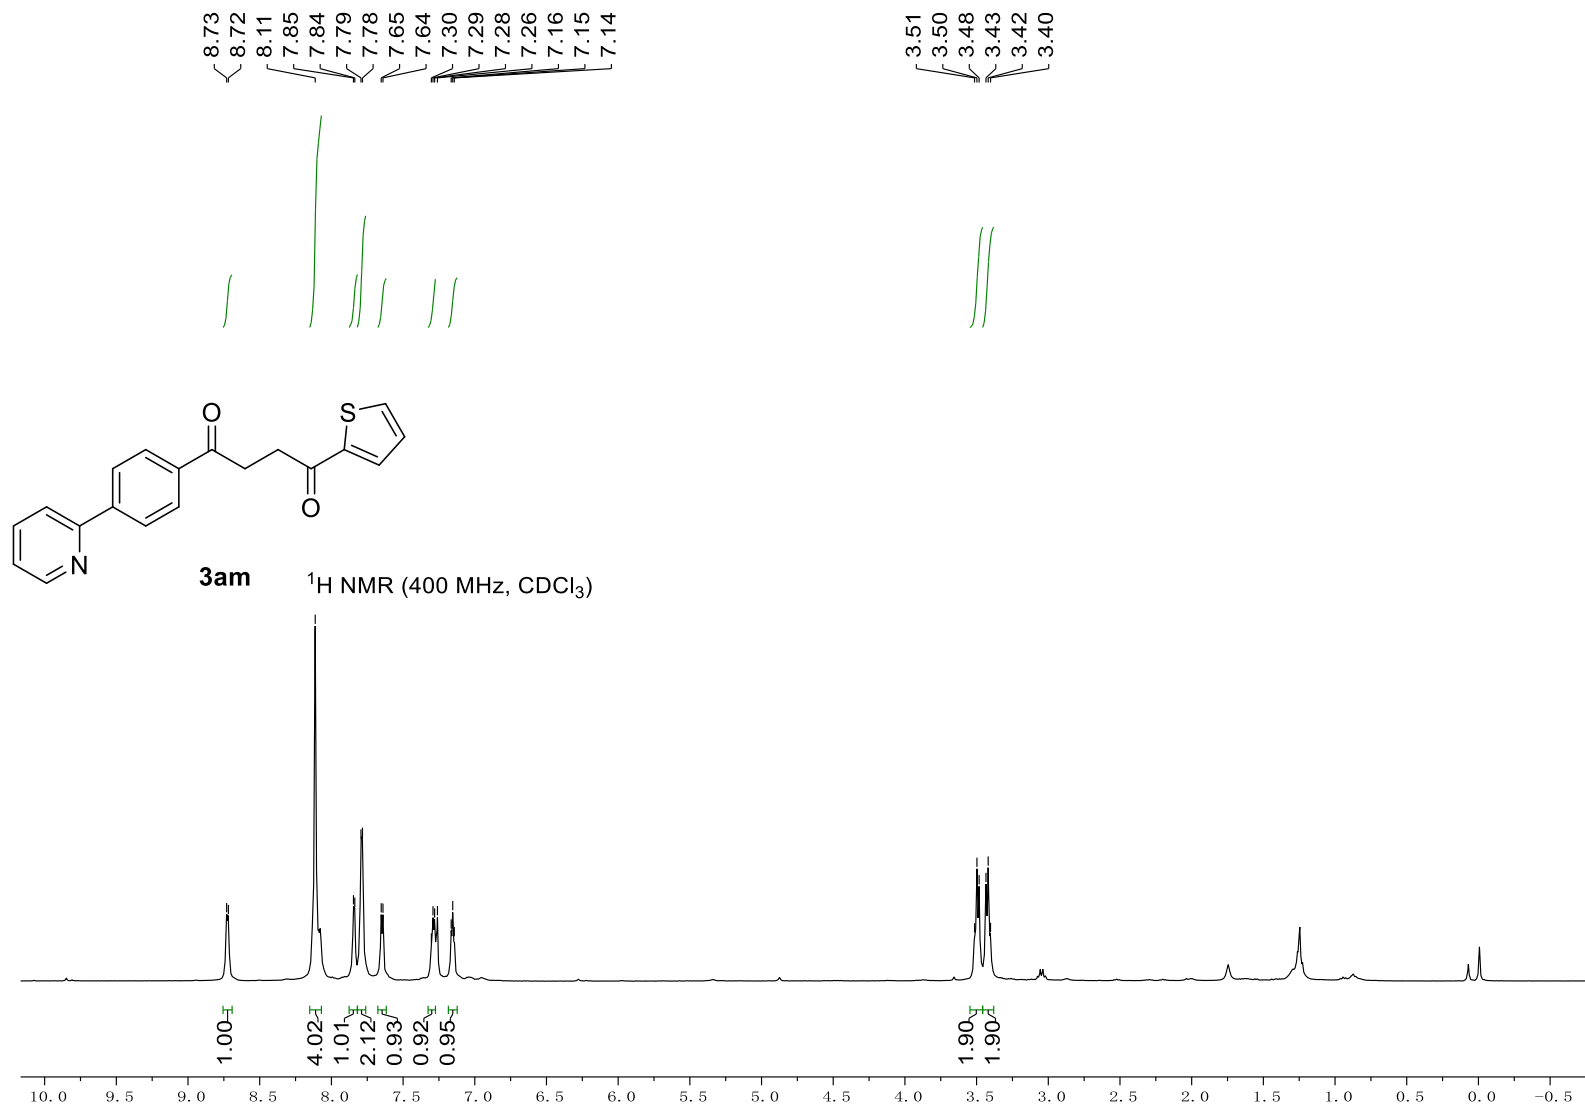

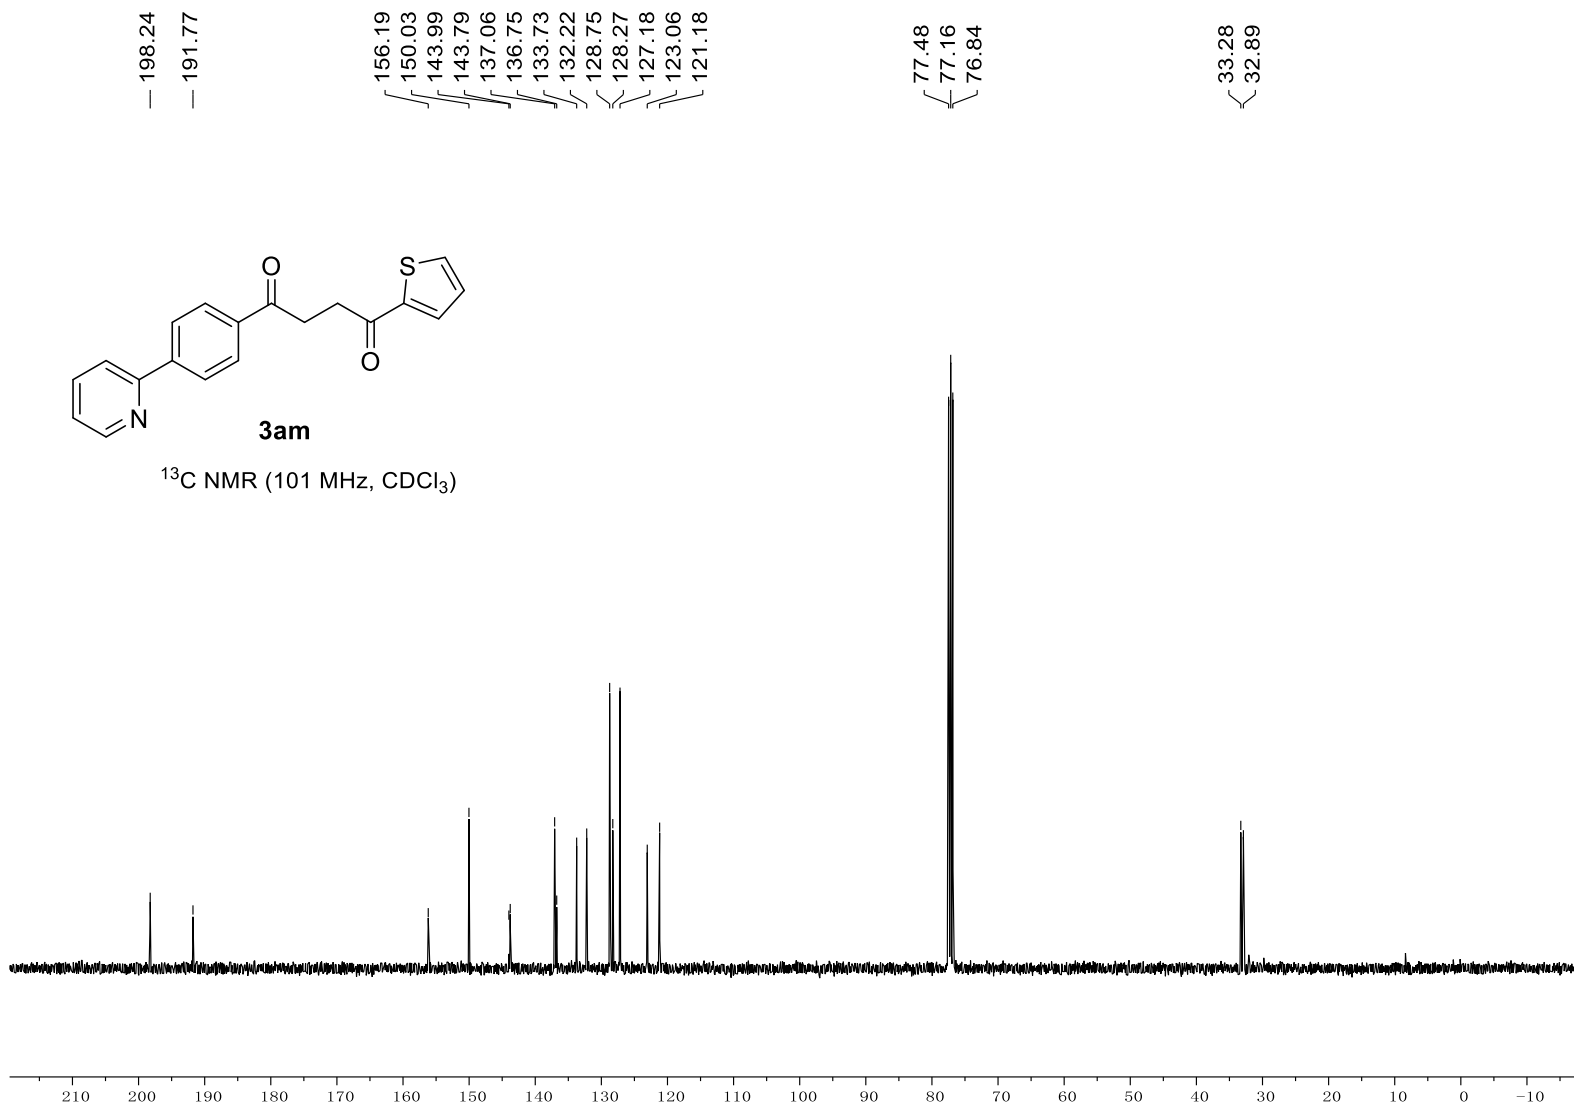



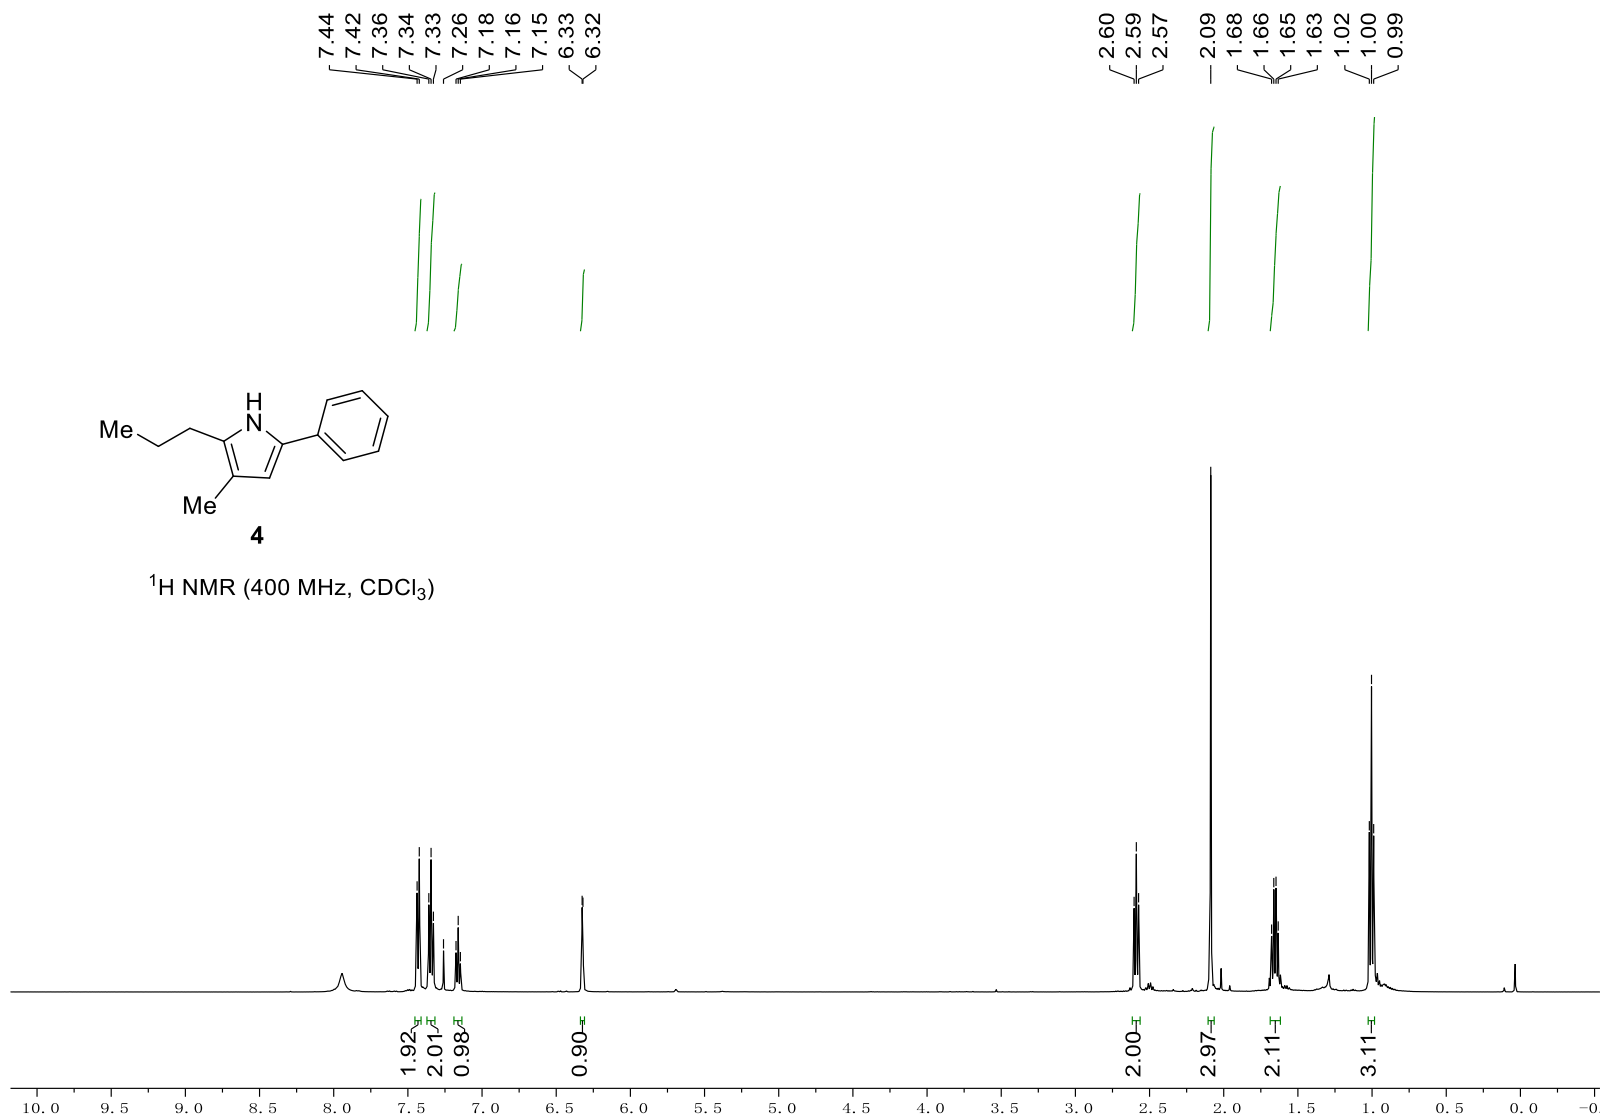

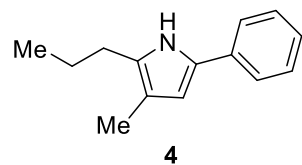

$^{13}\text{C}$  NMR (101 MHz,  $\text{CDCl}_3$ )

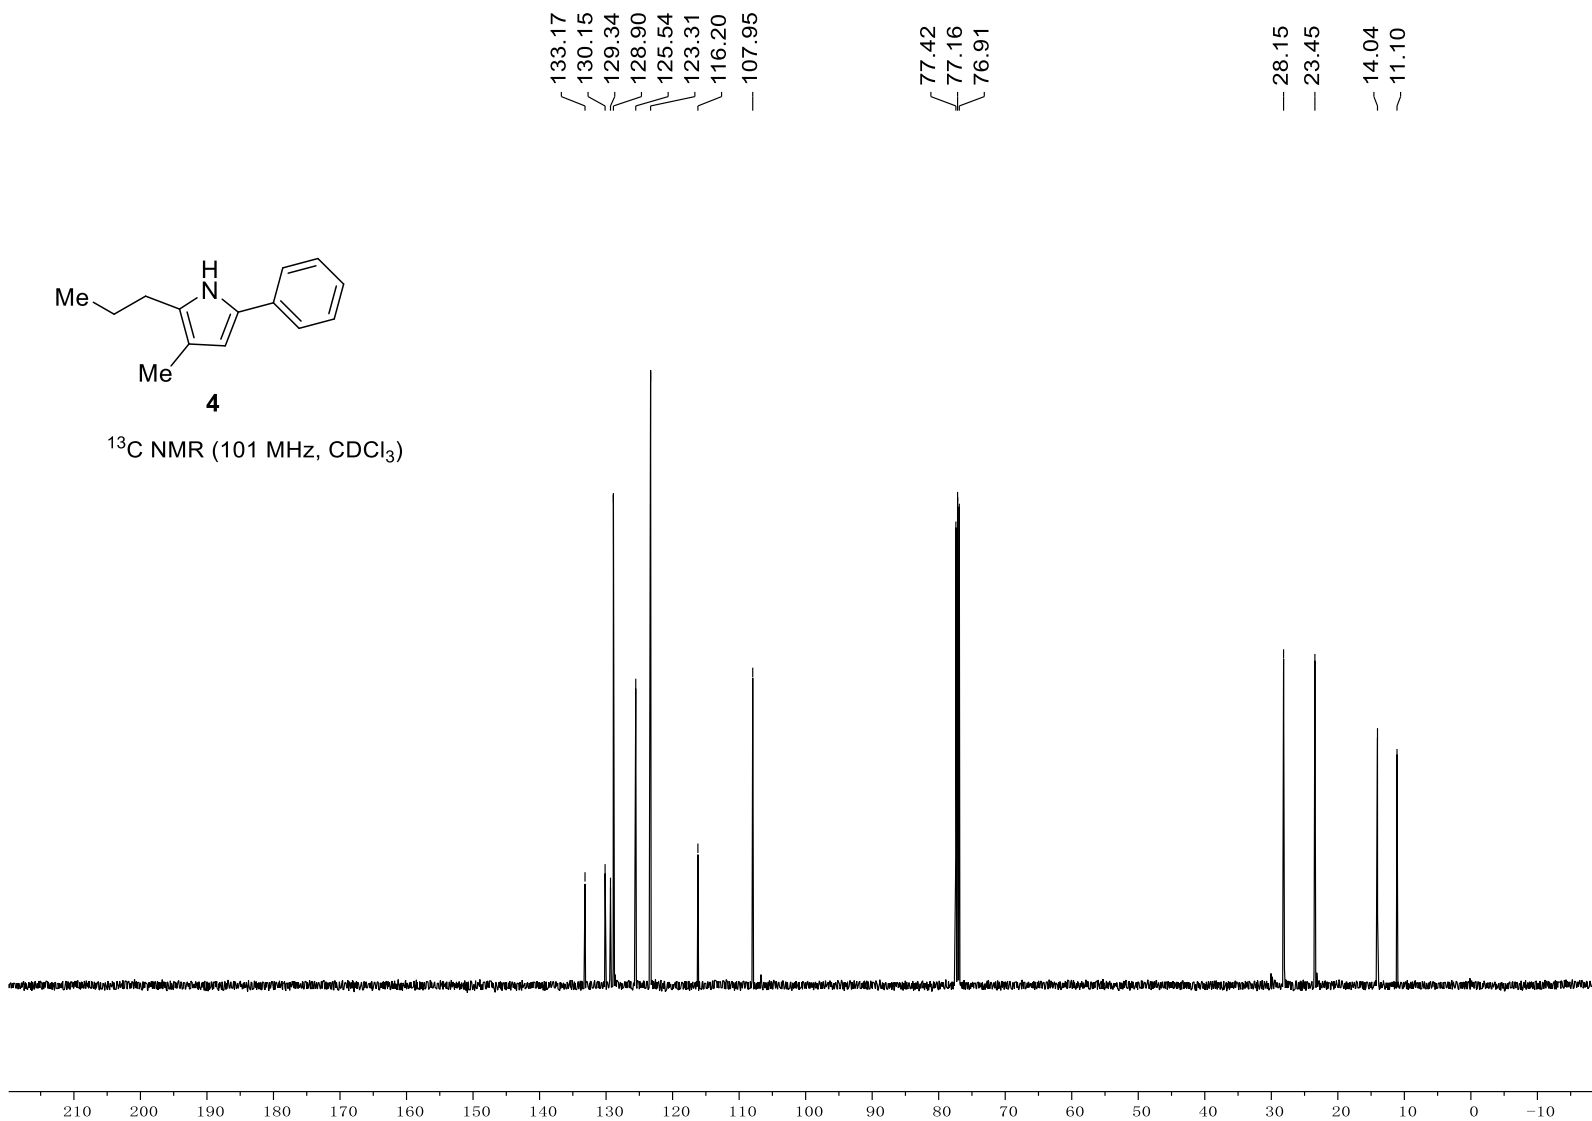

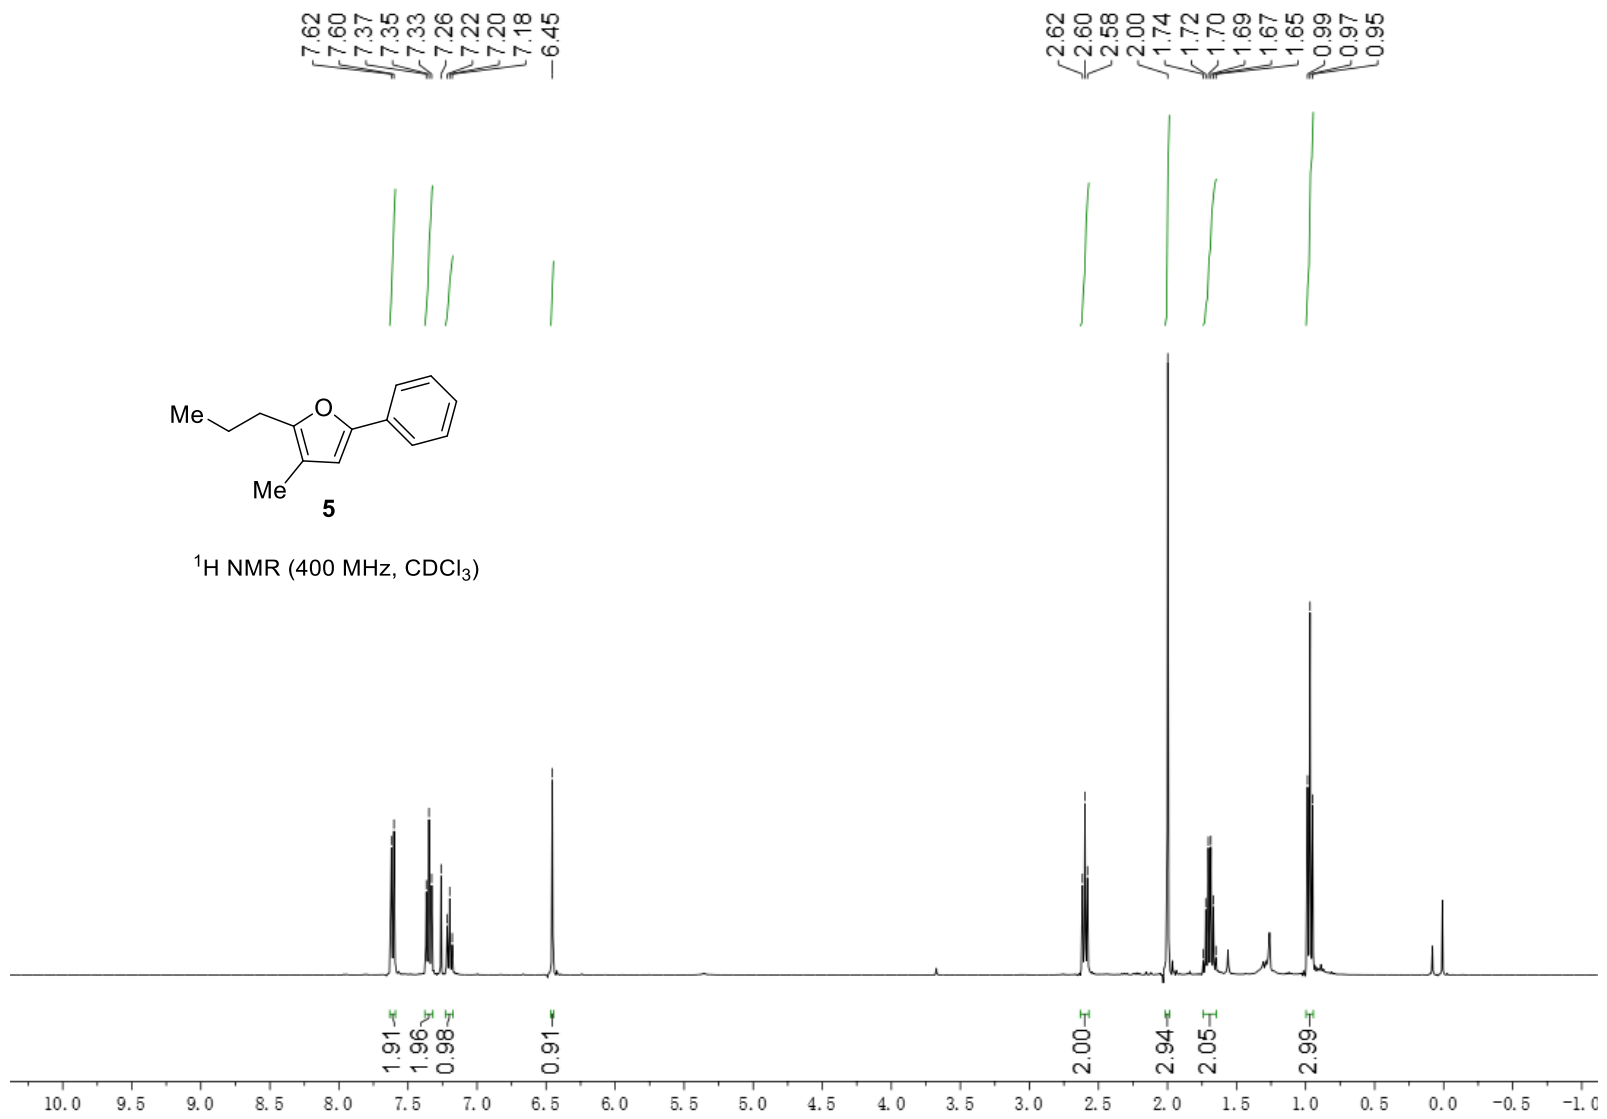

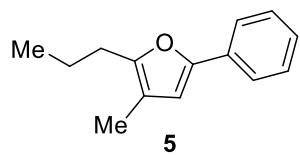

<sup>13</sup>C NMR (101 MHz, CDCl<sub>3</sub>)

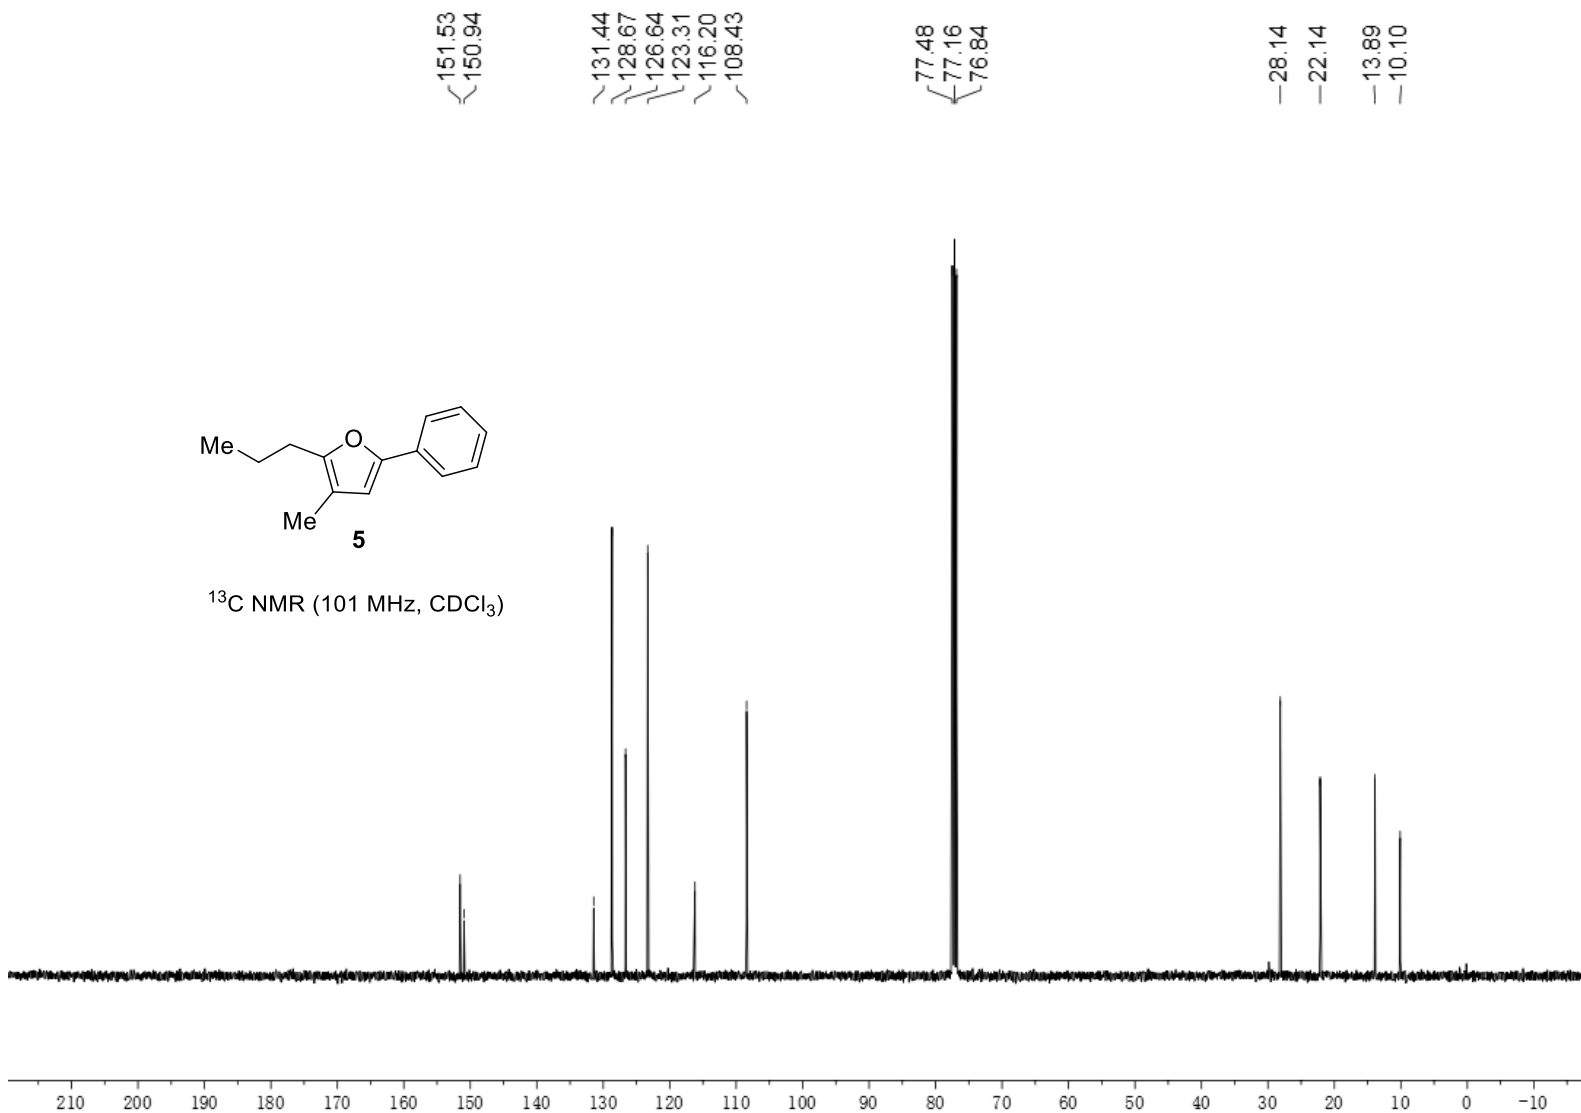

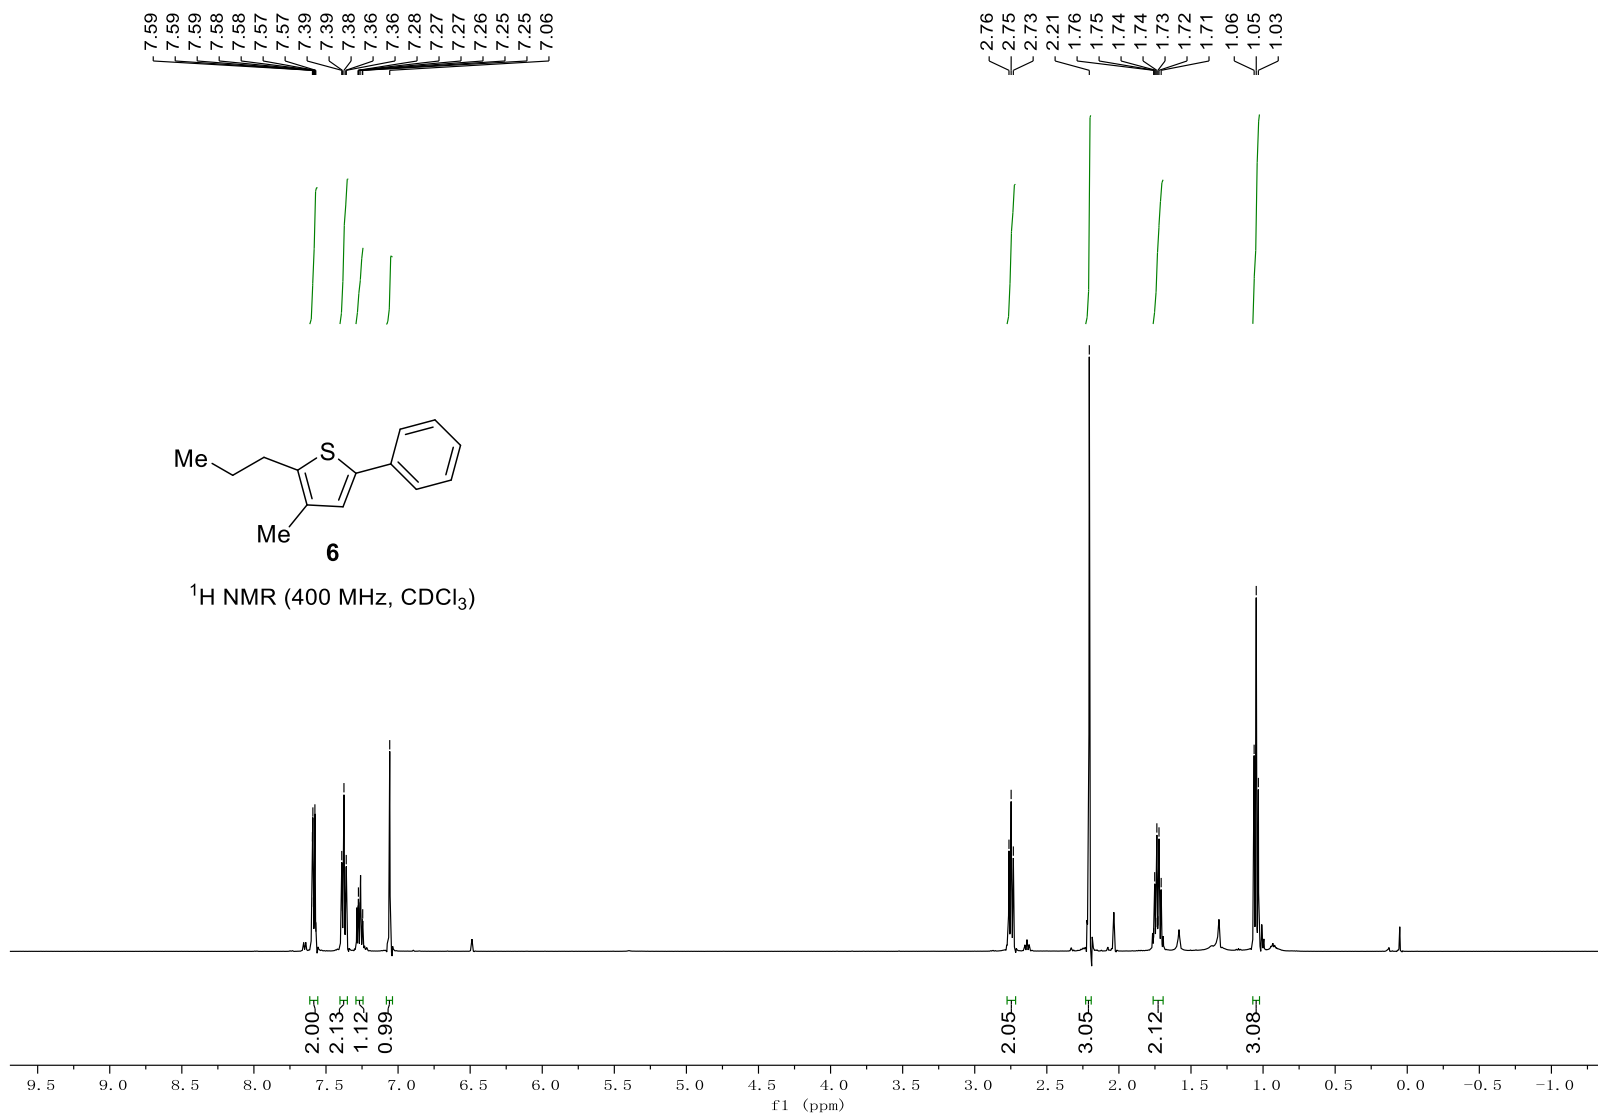

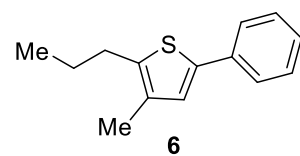

<sup>13</sup>C NMR (101 MHz, CDCl<sub>3</sub>)

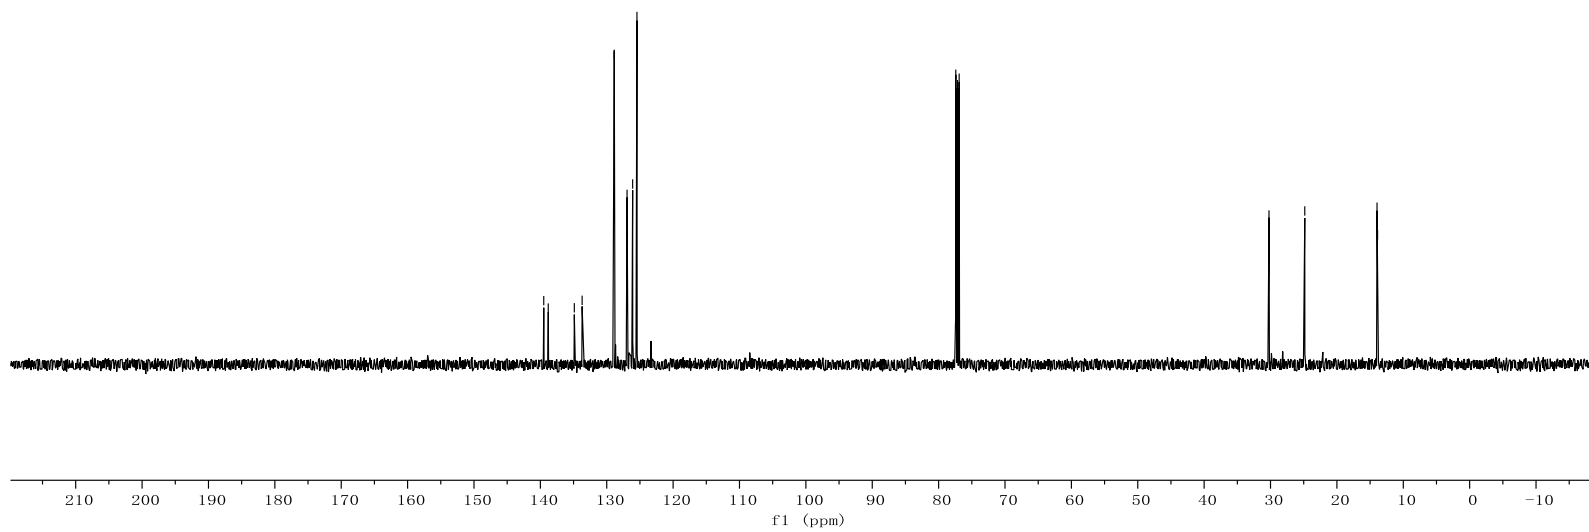

Supplement: d2qo00935h1.pdf [file d2qo00935h1.pdf]
